# Supplementary material for: Computational screening of metal-substituted HKUST-1 catalysts for chemical fixation of carbon dioxide into epoxides
Source: Royal Society of Chemistry journal article supplement (doi:10.1039/c9ta02455g), 2019-01-01
Supplement: c9ta02455g1.pdf [file c9ta02455g1.pdf]

## Supporting Information

### **Computational screening of metal-substituted HKUST-1 catalysts for chemical fixation of carbon dioxide into epoxides**

Tian-ding Hu, Yan Jiang, Yi-hong Ding\*

*Laboratory of Theoretical and Computational Chemistry, Institute of Theoretical Chemistry, Jilin University, Changchun 130023, People's Republic of China*

- S1. Supercage-based calculations for HKUST-1 S2**
- S2. The reliability of single-point energy calculations S5**
- S3. The effects of electronic properties of different metal centers on catalytic performance S8**
- S4. Table S6. The energies of M-HKUST-1 with different spin states S8**
- S5. Table S7. Relative Gibbs free energies for the stationary points along the reaction pathway for CO<sub>2</sub> fixation on M-HKUST-1 catalysts S9**
- S6. Table S8. The key geometrical parameters for the transition state of ring-opening step S10**
- S7. Table S9. The Gibbs free energy of the key steps for CO<sub>2</sub> fixation catalyzed by M-HKUST-1 S11**
- S8. The Coordinates of all stable intermediates and transition states S12**
- S9. References S126**

---

\* Corresponding author.  
E-mail addresses: [yhdd@jlu.edu.cn](mailto:yhdd@jlu.edu.cn) (Y. Ding).

## S1. Supercage-based calculations for HKUST-1

Calculations based on a supercage model with 408 atoms obtained from previous publication<sup>1</sup> were also performed with two-layer ONIOM(QM/MM) method<sup>2</sup> to verify the reliability of cluster-based calculations. The inner layer included a Cu<sub>2</sub> paddle-wheel unit and reactant molecules, and the remainder was the outer layer fixed at the crystal positions. Previous publications have demonstrated that this methodology can reproduce experimental results well in the MOF-catalyzed system.<sup>3</sup> For all geometry optimization and vibrational frequency calculations, the B3LYP was used in conjunction with the LANL2DZ effective core potential basis set and the 6-31+G\* basis set to describe the QM atoms. The Universal Force Field (UFF) parameter set was used for describing the extended framework of MM atoms. Single-point energy calculations were subsequently performed at the ONIOM (M06-2X/6-311+G (2d,p)&&SDD :UFF).

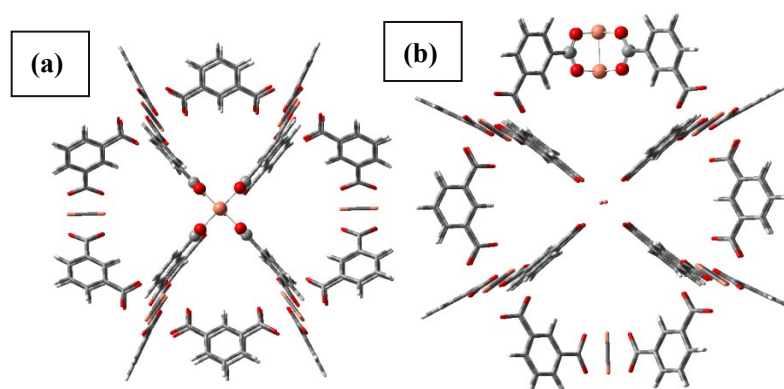

Figure S1. The top view (a) and side view (b) of the supercage model for HKUST-1.

- A. From the geometrical point of view, the supercage-based calculations give the similar geometrical parameters with the cluster-based calculations (Table S1), suggesting that our cluster-based calculations are able to replicate the HKUST-1 structure very well.

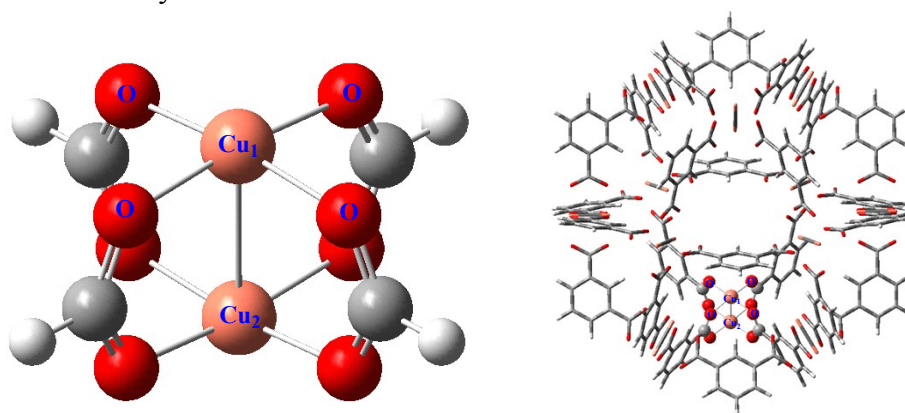

Figure S2. Optimized geometry of cluster model and supercage model for HKUST-1

Table S1. The key bond lengths and bond angles and its deviations of the optimized supercage model and cluster model for HKUST-1 (The supercage model is taken as reference).

|                        | Supercage model | Cluster model | Deviation |
|------------------------|-----------------|---------------|-----------|
| <b>Bond lengths(Å)</b> |                 |               |           |
| Cu(1)-O                | 1.9673          | 1.9885        | 1.08%     |
| Cu(1)-Cu(2)            | 2.5227          | 2.5486        | 1.03%     |
| <b>Bond angles(°)</b>  |                 |               |           |
| ∠O-Cu(1)-Cu(2)         | 85.6452         | 86.0221       | 0.44%     |

B. The stability of the catalytic center of HKUST-1 in cluster model is investigated compared with the supercage model. It was shown that the two model calculations give the same energy ordering in different spin states for Cu-HKUST-1.

Table S2. The energies (Hartrees) of Cu-HKUST-1 with different spin states.

| Spin state      | Cluster Model          |                           |                            | Supercage Model        |                           |                           |
|-----------------|------------------------|---------------------------|----------------------------|------------------------|---------------------------|---------------------------|
|                 | Total Energy (Hartree) | Relative Energy (Hartree) | Relative Energy (kcal/mol) | Total Energy (Hartree) | Relative Energy (Hartree) | Energy Barrier (kcal/mol) |
| <b>singlet</b>  | -1151.4500             | 0.1085                    | 68.08                      | -1146.6024             | 0.1086                    | 68.15                     |
| <b>triplet</b>  | -1151.5585             | 0.0000                    | 0.00                       | -1146.7110             | 0.0000                    | 0.00                      |
| <b>quintet</b>  | -1151.3829             | 0.1756                    | 110.19                     | -1146.4972             | 0.2138                    | 134.15                    |
| <b>septet</b>   | -1151.2072             | 0.3513                    | 220.44                     | -1146.3167             | 0.3942                    | 247.38                    |
| <b>nonet</b>    | -1151.0266             | 0.5319                    | 333.77                     | -1146.1812             | 0.5297                    | 332.42                    |
| <b>undectet</b> | -1150.8400             | 0.7185                    | 450.87                     | -1146.0039             | 0.7071                    | 443.71                    |
| <b>13-et</b>    | -1150.6674             | 0.8911                    | 559.17                     | -1145.8333             | 0.8777                    | 550.74                    |
| <b>15-et</b>    | -1150.4635             | 1.0950                    | 687.12                     | -1145.7023             | 1.0086                    | 632.92                    |

C. The key reaction pathway has been investigated with the supercage model. The energy profiles along the reaction catalyzed by the HKUST-1/TBAB obtained with the cluster model and supercage model are shown in Figure S3. (the corresponding energies are listed in the table S3 ) As can be seen in Figure S3, the energy profiles obtained with the cluster and supercage models show that the cluster-based calculation can capture the relative trends from the supercage-based calculation and present the same reaction mechanism with supercage-based calculation. Specifically, the CO<sub>2</sub> insertion is also the lowest-barrier step in the three steps.

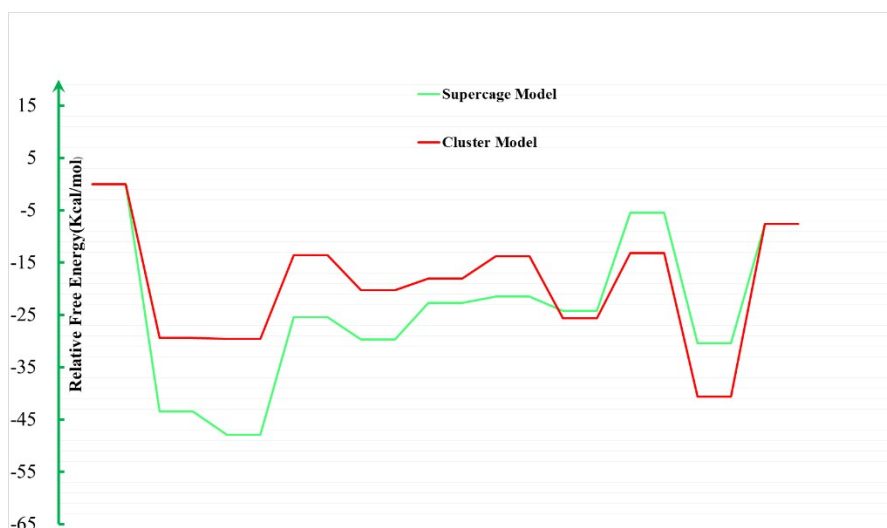

Figure S3. The energy profile along the reaction catalyzed by the HKUST-1/TBAB obtained with the cluster model and supercage model.

Table S3. The energies along the reaction catalyzed by the Cu-HKUST-1/TBAB obtained with the cluster and supercage model.

| Structures   | Supercage Model        |                            |                           | Cluster Model          |                            |                           |
|--------------|------------------------|----------------------------|---------------------------|------------------------|----------------------------|---------------------------|
|              | Total Energy (Hartree) | Relative Energy (kcal/mol) | Energy Barrier (kcal/mol) | Total Energy (Hartree) | Relative Energy (kcal/mol) | Energy Barrier (kcal/mol) |
| Cat+reactant | -1541.8108             | 0.00                       |                           | -1546.6568             | 0.00                       |                           |
| Int0         | -1541.8801             | -43.48                     |                           | -1546.7036             | -29.34                     |                           |
| Int1         | -1541.8871             | -47.87                     |                           | -1546.7040             | -29.56                     |                           |
| TS1          | -1541.8513             | -25.42                     | 22.45                     | -1546.6785             | -13.57                     | 15.99                     |
| Int2         | -1541.8604             | -31.10                     |                           | -1546.6891             | -20.24                     |                           |
| Int3         | -1541.8470             | -22.71                     |                           | -1546.6856             | -18.03                     |                           |
| TS2          | -1541.8450             | -21.46                     | 9.64                      | -1546.6788             | -13.77                     | 6.48                      |
| Int4         | -1541.8494             | -24.20                     |                           | -1546.6977             | -25.63                     |                           |
| TS3          | -1541.8195             | -5.44                      | 18.76                     | -1546.6779             | -13.22                     | 12.40                     |
| Int5         | -1541.8592             | -30.36                     |                           | -1546.7216             | -40.64                     |                           |
| Cat+product  | -1541.8229             | -7.60                      |                           | -1546.6690             | -7.60                      |                           |

Based on these evidences, we believe that the cluster-based calculations would not affect the conclusion in a significant way. As stated by Donald G. Truhlar et al, “Intuitively, one would expect that calculations based on periodic unit cells or on larger and relaxed cluster models would provide better results than those based on small clusters. The studies that we describe in the following show that when the phenomena under investigation are localized, smaller clusters can be also be quantitatively accurate.”<sup>4, 5</sup> The present work provides a similar case that the small model study can act as a very effective strategy to investigate systematically the mechanism of chemical fixation of CO<sub>2</sub> on metal-substituted HKUST-1.

## S2. The reliability of single-point energy calculations

For modeling the CO<sub>2</sub> cycloaddition reactions, the inclusion of dispersion corrections is necessary since the adsorbates have the dispersion interaction with the HKUST-1. Thus, several dispersion-containing functionals including M06,<sup>6</sup> PBE0-D3<sup>7, 8</sup>, and B3LYP-D3<sup>7, 9</sup> were chosen for the single-point energy calculation. One can see that M06-2X captures a similar trend with the M06, PBE0-D3, and B3LYP-D3 in the single-point energy calculation. In addition, we also test the basis set for this reaction and result showed that the activation energies change little as the basis set increased from 6-311+G(2df, p) to 6-311++G(3df,3p). For this reason, we believe that the M06-2X/6-311+(2df,p)&&SDD is reliable enough for our systems.

Table S4. Free energy barriers for ring-opening step ( $\Delta G_1$ ), CO<sub>2</sub>-insertion step ( $\Delta G_2$ ) and ring-closing step ( $\Delta G_3$ ) of the CO<sub>2</sub> cycloaddition catalyzed by HKUST-1/TBAB calculated with different functionals.

| Single-point calculation level               | $\Delta G_1$ (kcal mol <sup>-1</sup> ) | $\Delta G_2$ (kcal mol <sup>-1</sup> ) | $\Delta G_3$ (kcal mol <sup>-1</sup> ) |
|----------------------------------------------|----------------------------------------|----------------------------------------|----------------------------------------|
| <b>M06-2X/6-311+G(2df, p)&amp;&amp;SDD</b>   | 15.9900                                | 6.4760                                 | 12.4033                                |
| <b>PBE0-D3/6-311+G(2df, p)&amp;&amp;SDD</b>  | 17.3003                                | 7.1616                                 | 10.6911                                |
| <b>B3LYP-D3/6-311+G(2df, p)&amp;&amp;SDD</b> | 15.3920                                | 5.6685                                 | 14.4750                                |
| <b>M06/6-311+G(2df, p)&amp;&amp;SDD</b>      | 15.8602                                | 5.9525                                 | 11.1889                                |

Table S5. Free energy barriers for ring-opening step ( $\Delta G_1$ ), CO<sub>2</sub>-insertion step ( $\Delta G_2$ ) and ring-closing step ( $\Delta G_3$ ) of the CO<sub>2</sub> cycloaddition catalyzed by HKUST-1/TBAB calculated with different basis sets.

| Single-point calculation                       | $\Delta G_1$ (kcal mol <sup>-1</sup> ) | $\Delta G_2$ (kcal mol <sup>-1</sup> ) | $\Delta G_3$ (kcal mol <sup>-1</sup> ) |
|------------------------------------------------|----------------------------------------|----------------------------------------|----------------------------------------|
| <b>M06-2X/6-311+G(2df, p)&amp;&amp;LANL2DZ</b> | 16.8494                                | 6.3218                                 | 13.5546                                |
| <b>M06-2X/6-311+G(2df, p)&amp;&amp;SDD</b>     | 15.9900                                | 6.4760                                 | 12.4033                                |
| <b>M06-2X/6-311+G(2df, 2p) &amp;&amp;SDD</b>   | 15.9724                                | 6.4683                                 | 12.3772                                |
| <b>M06-2X/6-311+G(3df, 3p) &amp;&amp;SDD</b>   | 16.1988                                | 6.7883                                 | 11.8723                                |
| <b>M06-2X/6-311++G(3df, 3p) &amp;&amp;SDD</b>  | 16.2128                                | 6.7874                                 | 11.8720                                |

### S3. The effects of electronic properties of different M-HKUST-1 on catalytic performance.

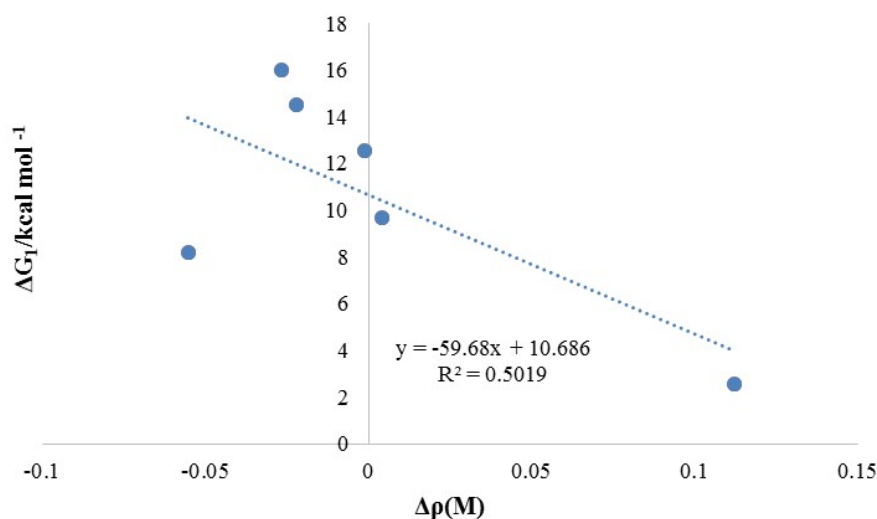

Figure S4. Relationship of the activation energy for ring-opening step  $\Delta G_1$  and the spin density difference  $\Delta\rho(M)$  for the active metal center between the **Int<sub>1</sub>** (shown in Figure 2 of the main text) and all high spin M-HKUST-1.

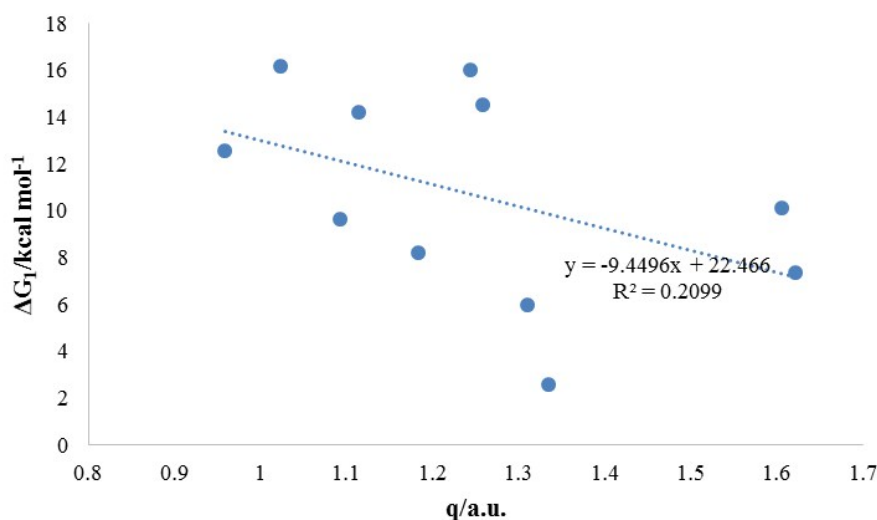

Figure S6. Relationship of NPA charge for the metal center in M-HKUST-1 and the activation energy for ring-opening step  $\Delta G_1$ .

The moderate (spin density difference  $\Delta\rho(M)$ ) and bad (NPA) correlation implies that the energy barriers for the reaction catalyzed by M-HKUST-1/TBAB are likely to be influenced by several factors (are not limited to the electronic properties of metal in the M-HKUST-1), e.g., coordination geometry. These factors lead synergistically to the deviation of the scaling line. When changing the original Cu atoms in HKUST-1 into other metal atoms in M-HKUST-1, the optimized M-HKUST-1 structures are significantly different from the Cu-HKUST-1 (i.e., the coordination number, M-M

bond interaction and/or oxidation state of the metal), which influences the activity of M-HKUST-1 to a different degree. Such deviation from the scaling line has also been mentioned by a very recent report.<sup>10</sup>

**S4.** Table S6. The energies (Hartrees) of M-HKUST-1 with different spin states. The minimum-energies for each M-HKUST-1 are marked green.

| HKUST-1   | singlet    | triplet    | quintet    | septet     | nonet      | undectet   | 13-et      | 15-et      |
|-----------|------------|------------|------------|------------|------------|------------|------------|------------|
| <b>Cu</b> | -1151.4500 | -1151.5585 | -1151.3829 | -1151.2072 | -1151.0266 | -1150.8400 | -1150.6674 | -1150.4635 |
| <b>Fe</b> | -1004.4615 | -1004.4573 | -1004.6153 | -1004.6768 | -1004.6841 | -1004.6063 | -1004.4671 | -1004.2858 |
| <b>Cr</b> | -930.5827  | -930.8091  | -930.6387  | -930.7805  | -930.8774  | -930.6369  | -930.5193  | -930.3682  |
| <b>Ru</b> | -946.2891  | -946.3126  | -946.3002  | -946.2943  | -946.2813  | -946.1205  | -945.9439  | -945.7751  |
| <b>Ti</b> | -873.3770  | -873.4501  | -873.4067  | -873.2794  | -873.0909  | -872.9141  | -872.7384  | -872.5596  |
| <b>W</b>  | -890.8206  | -890.7992  | -890.7003  | -890.7517  | -890.7192  | -890.5377  | -890.3554  | -890.1693  |
| <b>Sc</b> | -850.3961  | -850.3707  | -850.2127  | -849.8803  | -849.8549  | -849.6767  | -849.4625  | -849.2683  |
| <b>Mo</b> | -893.0475  | -892.9631  | -892.9643  | -893.0149  | -892.9999  | -892.8158  | -892.6390  | -892.4550  |
| <b>Zn</b> | -1211.2742 | -1211.1097 | -1210.9161 | -1210.7798 | -1210.6043 | -1210.4264 | -1210.2611 | -1210.0532 |
| <b>V</b>  | -900.0848  | -900.0522  | -900.0883  | -900.1410  | -900.0096  | -899.7942  | -899.6643  | -899.4878  |
| <b>Cd</b> | 1092.1368  | 1091.9957  | 1091.8293  | 1091.6894  | 1091.5180  | 1091.3533  | 1091.1921  | 1090.9764  |



**S5.** Table S7. Relative Gibbs free energies (kcal mol<sup>-1</sup>) for the stationary points along the reaction pathway for CO<sub>2</sub> fixation on M-HKUST-1 catalysts.

| <b>Structures</b> | Mo     | Cr     | Fe     | Ti     | Cu     | W      | Sc     | Ru     | Zn     | Cd     | V      |
|-------------------|--------|--------|--------|--------|--------|--------|--------|--------|--------|--------|--------|
| Cat+reactant      | 0.00   | 0.00   | 0.00   | 0.00   | 0.00   | 0.00   | 0.00   | 0.00   | 0.00   | 0.00   | 0.00   |
| Int0              | -23.96 | -28.34 | -72.87 | -40.54 | -29.34 | -23.21 | -26.14 | -40.49 | -29.59 | -24.54 | -60.50 |
| Int1              | -20.46 | -26.13 | -66.12 | -57.46 | -29.56 | -19.29 | -21.78 | -38.08 | -26.25 | -21.19 | -57.57 |
| TS1               | -4.29  | -11.63 | -63.56 | -47.79 | -13.57 | -5.11  | -15.79 | -25.54 | -18.90 | -11.08 | -49.39 |
| Int2              | -7.56  | -18.60 | -71.23 | -50.42 | -20.24 | -8.72  | -24.28 | -29.39 | -26.09 | -16.38 | -51.52 |
| Int3              | -5.05  | -16.08 | -67.84 | -47.14 | -18.03 | -5.43  | -19.42 | -26.00 | -22.30 | -11.40 | -49.09 |
| TS2               | -1.56  | -13.01 | -62.25 | -39.42 | -13.77 | -2.91  | -14.05 | -24.45 | -17.09 | -5.86  | -48.57 |
| Int4              | -14.26 | -24.92 | -73.52 | -62.58 | -25.63 | -14.26 | -27.12 | -31.92 | -29.74 | -21.82 | -63.14 |
| TS3               | -3.36  | -11.06 | -58.47 | -34.25 | -13.22 | -2.73  | -9.14  | -14.89 | -15.13 | -7.25  | -41.92 |
| Int5              | -32.48 | -38.71 | -82.00 | -69.60 | -40.64 | -31.49 | -34.59 | -47.50 | -38.05 | -33.61 | -67.30 |
| Cat+product       | -7.60  | -7.60  | -7.60  | -7.60  | -7.60  | -7.60  | -7.60  | -7.60  | -7.60  | -7.60  | -7.60  |

**S6.** Table S8. The key geometrical parameters for the transition state of ring-opening step.

| <b>M-HKUST-1</b> | <b>Energy Barriers<br/>(kcal mol<sup>-1</sup>)</b> | <b><math>d_{C(2)-Br}</math><br/>(Å)</b> | <b><math>\theta_{OC(1)C(2)}</math><br/>(deg)</b> |
|------------------|----------------------------------------------------|-----------------------------------------|--------------------------------------------------|
| <b>Zn</b>        | 7.35                                               | 2.83                                    | 69.94                                            |
| <b>V</b>         | 8.18                                               | 2.83                                    | 70.57                                            |
| <b>Ti</b>        | 9.66                                               | 2.80                                    | 71.67                                            |
| <b>Cd</b>        | 10.11                                              | 2.81                                    | 70.73                                            |
| <b>Sc</b>        | 12.54                                              | 2.77                                    | 73.33                                            |
| <b>Fe</b>        | 12.54                                              | 2.77                                    | 73.33                                            |
| <b>Ru</b>        | 12.54                                              | 2.77                                    | 73.33                                            |
| <b>W</b>         | 14.18                                              | 2.75                                    | 74.64                                            |
| <b>Cr</b>        | 14.50                                              | 2.73                                    | 75.58                                            |
| <b>Pb</b>        | 14.55                                              | 2.78                                    | 73.41                                            |
| <b>Cu</b>        | 15.99                                              | 2.66                                    | 77.98                                            |
| <b>Mo</b>        | 16.17                                              | 2.72                                    | 76.00                                            |

S7. Table S9. The Gibbs free energy (kcal mol<sup>-1</sup>) of the key steps for CO<sub>2</sub> fixation catalyzed by M-HKUST-1.

| <b>M-HKUST-1</b> | <b>PO-adsorption</b> | <b>Ring-opening</b> | <b>CO<sub>2</sub>-insertion</b> | <b>Ring-closing</b> |
|------------------|----------------------|---------------------|---------------------------------|---------------------|
| <b>Mo</b>        | -23.96               | 16.17               | 6.01                            | 10.90               |
| <b>Cr</b>        | -28.34               | 14.50               | 5.59                            | 13.86               |
| <b>Ti</b>        | -68.54               | 9.66                | 11.00                           | 28.34               |
| <b>Cu</b>        | -29.34               | 15.99               | 6.48                            | 12.40               |
| <b>W</b>         | -23.21               | 14.18               | 5.81                            | 11.53               |
| <b>Sc</b>        | -26.14               | 5.99                | 10.23                           | 17.98               |
| <b>Ru</b>        | -40.49               | 12.54               | 4.94                            | 17.03               |
| <b>Zn</b>        | -29.59               | 7.35                | 9.00                            | 14.62               |
| <b>Cd</b>        | -24.54               | 10.11               | 10.52                           | 14.57               |
| <b>V</b>         | -60.50               | 8.18                | 2.95                            | 21.22               |
| <b>Fe</b>        | -72.87               | 2.56                | 5.59                            | 15.05               |

## S8. The Coordinates of all stable intermediates and transition states.

Catalyst: Cu-HKUST-1; Co-catalyst: X<sup>-</sup> (X = F, Cl, Br, I)

Cu-HKUST-1/F<sup>-</sup>

### Cu-HKUST-1

```
-----  
Cu    -0.000845   0.000072  -1.273814  
Cu     0.001419  -0.000084   1.274814  
O     -0.331103  -1.955835  -1.137057  
O      0.328968   1.956093  -1.137254  
O      1.955459  -0.330105  -1.137144  
O     -1.956996   0.330170  -1.134876  
O     -1.955957   0.322801   1.137654  
O      1.958186  -0.323260   1.135367  
O      0.323353   1.957379   1.135270  
O     -0.323024  -1.957200   1.135459  
C     -0.418298  -2.505718  -0.000795  
C      0.416957   2.506008  -0.001076  
C      2.506060  -0.417743  -0.001308  
C     -2.505706   0.417457   0.001945  
H     -0.598611  -3.590763  -0.000795  
H     -3.590778   0.597623   0.003049  
H      3.591099  -0.598070  -0.002001  
H      0.596456   3.591188  -0.001221  
-----
```

### F-Int<sub>1</sub>

```
-----  
Cu    -0.290358   0.182531  -0.330736  
Cu     2.267509  -0.199064   0.351285  
O     -0.317042  -1.841289   0.075532  
O      0.395801   2.096212  -0.560071  
O      0.539734  -0.260977  -2.165946  
O     -0.362989   0.516400   1.710765  
O      1.867942   0.476520   2.169658  
O      2.625921  -0.868084  -1.477480  
O      2.613763   1.653487  -0.259777  
O      1.789625  -2.030767   0.925914  
C      0.630995  -2.452123   0.626204
```

|   |           |           |           |
|---|-----------|-----------|-----------|
| C | 1.616547  | 2.387729  | -0.533152 |
| C | 1.697372  | -0.712356 | -2.328391 |
| C | 0.641575  | 0.642109  | 2.449760  |
| H | 0.449123  | -3.497922 | 0.890978  |
| H | 0.442853  | 0.936482  | 3.482423  |
| H | 1.953596  | -1.018397 | -3.344977 |
| H | 1.873295  | 3.422765  | -0.778721 |
| O | -2.384445 | 0.388990  | -0.783360 |
| C | -3.459046 | 0.443349  | 0.227676  |
| C | -4.475770 | 1.534157  | 0.051771  |
| C | -3.387296 | -0.692729 | -0.671624 |
| H | -3.078316 | 0.299210  | 1.237028  |
| H | -5.371084 | 1.248165  | 0.612370  |
| H | -4.091318 | 2.497726  | 0.412134  |
| H | -4.751756 | 1.635558  | -1.003638 |
| F | -5.716648 | -1.179301 | 0.413200  |
| H | -4.062121 | -0.739125 | -1.519302 |
| H | -2.984561 | -1.636054 | -0.318380 |

-----

**F-TS<sub>1</sub>**

-----

|    |           |           |           |
|----|-----------|-----------|-----------|
| Cu | 0.347320  | -0.164481 | -0.296221 |
| Cu | -2.252531 | 0.200594  | 0.307319  |
| O  | -0.367311 | 0.422400  | -2.130960 |
| O  | 0.365422  | -0.672926 | 1.695452  |
| O  | -0.470212 | -2.038129 | -0.687118 |
| O  | 0.326260  | 1.801494  | 0.279408  |
| O  | -1.911758 | 2.143030  | 0.507843  |
| O  | -2.582177 | -1.739544 | 0.109871  |
| O  | -1.775115 | -0.075375 | 2.203835  |
| O  | -2.589974 | 0.458806  | -1.619029 |
| C  | -1.587763 | 0.549038  | -2.393452 |
| C  | -0.604592 | -0.484069 | 2.471168  |
| C  | -1.622223 | -2.415210 | -0.377792 |
| C  | -0.694384 | 2.499805  | 0.483362  |
| H  | -1.847498 | 0.770771  | -3.435576 |
| H  | -0.513599 | 3.561793  | 0.664499  |
| H  | -1.842199 | -3.472827 | -0.546501 |
| H  | -0.434583 | -0.698811 | 3.532665  |
| O  | 2.371924  | -0.472380 | -0.750786 |
| C  | 3.411597  | -0.567934 | 0.256881  |
| C  | 4.391895  | -1.698151 | 0.077899  |

|   |          |           |           |
|---|----------|-----------|-----------|
| C | 3.511361 | 0.645595  | -0.526494 |
| H | 3.030497 | -0.458791 | 1.273936  |
| H | 5.264760 | -1.517362 | 0.715809  |
| H | 3.934764 | -2.658605 | 0.351017  |
| H | 4.729505 | -1.751771 | -0.963141 |
| F | 5.332370 | 1.462311  | 0.319062  |
| H | 4.115586 | 0.664861  | -1.419594 |
| H | 3.050717 | 1.559210  | -0.184061 |

-----

### F-Int<sub>2</sub>

-----

|    |           |           |           |
|----|-----------|-----------|-----------|
| Cu | 0.456001  | -0.461504 | -0.667399 |
| Cu | -2.117112 | 0.389779  | 0.484550  |
| O  | 0.478463  | 1.727991  | -0.496740 |
| O  | -0.669916 | -2.261424 | -0.262035 |
| O  | -0.875472 | -0.175127 | -2.182865 |
| O  | 0.440053  | -0.242383 | 1.631181  |
| O  | -1.700001 | -0.085909 | 2.358109  |
| O  | -2.685151 | 0.916583  | -1.359414 |
| O  | -2.756667 | -1.428366 | 0.151657  |
| O  | -1.383520 | 2.183385  | 0.745040  |
| C  | -0.277088 | 2.458908  | 0.180630  |
| C  | -1.903419 | -2.344171 | -0.085515 |
| C  | -1.941641 | 0.477237  | -2.282738 |
| C  | -0.445187 | -0.280506 | 2.502105  |
| H  | 0.023446  | 3.502472  | 0.327500  |
| H  | -0.132741 | -0.510656 | 3.529059  |
| H  | -2.271552 | 0.692260  | -3.304372 |
| H  | -2.358711 | -3.340317 | -0.134710 |
| O  | 2.244993  | -0.981423 | -0.636225 |
| C  | 3.245619  | -0.448132 | 0.175421  |
| C  | 4.340662  | -1.496232 | 0.416654  |
| C  | 3.790455  | 0.809442  | -0.508682 |
| H  | 2.818320  | -0.154562 | 1.147999  |
| H  | 5.150028  | -1.087386 | 1.034509  |
| H  | 3.908125  | -2.367458 | 0.920941  |
| H  | 4.761991  | -1.829412 | -0.541452 |
| F  | 4.826239  | 1.419933  | 0.272946  |
| H  | 4.238878  | 0.557404  | -1.477009 |
| H  | 2.999602  | 1.552380  | -0.633269 |

-----

**F-Int<sub>3</sub>**

-----

|    |           |           |           |
|----|-----------|-----------|-----------|
| Cu | 0.277321  | 0.375498  | -0.107099 |
| Cu | -2.594036 | -0.269848 | 0.035410  |
| O  | -0.551653 | 1.642143  | 1.425983  |
| O  | -0.116614 | -1.247524 | -1.529699 |
| O  | -0.710894 | 1.559838  | -1.409369 |
| O  | -0.299876 | -1.316511 | 1.360989  |
| O  | -2.537543 | -1.344724 | 1.699095  |
| O  | -2.830006 | 0.790424  | -1.650238 |
| O  | -2.262165 | -1.863935 | -1.043657 |
| O  | -2.794142 | 1.368979  | 1.080815  |
| C  | -1.760359 | 1.917056  | 1.584137  |
| C  | -1.125529 | -1.984055 | -1.602364 |
| C  | -1.831683 | 1.495887  | -1.969116 |
| C  | -1.327354 | -1.650451 | 1.973897  |
| H  | -2.012102 | 2.751477  | 2.250520  |
| H  | -1.198084 | -2.282677 | 2.862318  |
| H  | -1.952713 | 2.139973  | -2.846288 |
| H  | -1.062578 | -2.875403 | -2.238235 |
| O  | 2.084160  | 0.139443  | 0.330450  |
| O  | 2.410661  | 3.059209  | -0.247866 |
| C  | 2.682942  | -1.118819 | 0.476047  |
| C  | 3.423012  | 2.483375  | -0.154670 |
| C  | 3.314916  | -1.482245 | -0.870949 |
| H  | 1.913064  | -1.870947 | 0.705095  |
| C  | 3.704066  | -1.106845 | 1.620066  |
| O  | 4.488171  | 1.996984  | -0.086330 |
| H  | 2.549086  | -1.529806 | -1.648979 |
| H  | 4.100238  | -0.766687 | -1.139054 |
| F  | 3.940945  | -2.770128 | -0.818869 |
| H  | 4.481341  | -0.355327 | 1.433446  |
| H  | 3.194733  | -0.852903 | 2.556525  |
| H  | 4.182396  | -2.088443 | 1.729804  |

-----

**F-TS<sub>2</sub>**

-----

|    |           |           |           |
|----|-----------|-----------|-----------|
| Cu | 0.219751  | 0.607162  | -0.151849 |
| Cu | -2.512012 | -0.514620 | 0.058552  |
| O  | -0.662500 | 1.539160  | 1.563398  |
| O  | 0.011975  | -0.868224 | -1.722878 |

|   |           |           |           |
|---|-----------|-----------|-----------|
| O | -0.944261 | 1.761101  | -1.229775 |
| O | -0.094786 | -1.302458 | 1.136768  |
| O | -2.247969 | -1.868552 | 1.497225  |
| O | -2.985223 | 0.785868  | -1.405878 |
| O | -2.022015 | -1.824133 | -1.302956 |
| O | -2.843136 | 0.875988  | 1.384732  |
| C | -1.874664 | 1.542040  | 1.874550  |
| C | -0.905827 | -1.705274 | -1.898131 |
| C | -2.107300 | 1.643781  | -1.691626 |
| C | -0.989411 | -1.956423 | 1.698559  |
| H | -2.197437 | 2.207337  | 2.688981  |
| H | -0.668603 | -2.690174 | 2.450764  |
| H | -2.366561 | 2.402188  | -2.438239 |
| H | -0.765255 | -2.465403 | -2.680074 |
| O | 2.105513  | 0.367984  | 0.226763  |
| O | 1.929915  | 2.705618  | -0.278899 |
| C | 2.817075  | -0.846986 | 0.403348  |
| C | 2.892064  | 2.024175  | -0.061743 |
| C | 3.631844  | -1.109752 | -0.864758 |
| H | 2.070797  | -1.644317 | 0.489214  |
| C | 3.662786  | -0.830910 | 1.678680  |
| O | 4.080353  | 1.906788  | 0.043199  |
| H | 2.977403  | -1.096982 | -1.740775 |
| H | 4.453135  | -0.397879 | -0.979796 |
| F | 4.221600  | -2.411675 | -0.800511 |
| H | 4.406907  | -0.028711 | 1.647043  |
| H | 3.009285  | -0.670513 | 2.543563  |
| H | 4.179190  | -1.791216 | 1.802655  |

-----

#### **F-Int<sub>4</sub>**

-----

|    |          |           |           |
|----|----------|-----------|-----------|
| Cu | 0.281064 | -0.502003 | -0.084346 |
| Cu | 2.765722 | 0.624265  | 0.063795  |
| O  | 0.109697 | 0.602400  | 1.621682  |
| O  | 1.211003 | -1.286476 | -1.750032 |
| O  | 1.366833 | -1.872094 | 1.031160  |
| O  | 0.042881 | 1.225464  | -1.155975 |
| O  | 2.177583 | 2.014936  | -1.212624 |
| O  | 3.333602 | -0.769793 | 1.340963  |
| O  | 3.334165 | -0.520020 | -1.440925 |
| O  | 2.091883 | 1.725228  | 1.561888  |
| C  | 0.944170 | 1.447013  | 2.028170  |



|   |           |           |           |
|---|-----------|-----------|-----------|
| C | 2.428594  | -1.189870 | -2.030741 |
| C | 2.514583  | -1.728571 | 1.509157  |
| C | 0.942374  | 2.024073  | -1.508203 |
| H | 0.651775  | 2.033442  | 2.910402  |
| H | 0.625201  | 2.847742  | -2.160686 |
| H | 2.872514  | -2.534442 | 2.163569  |
| H | 2.776519  | -1.756748 | -2.906153 |
| O | -1.431122 | -1.634114 | -0.235448 |
| C | -2.649218 | -1.305041 | -0.137635 |
| O | -2.807417 | 0.076656  | 0.098388  |
| O | -3.660809 | -2.013126 | -0.233163 |
| C | -4.118370 | 0.589221  | 0.347025  |
| C | -5.097105 | 0.288460  | -0.793128 |
| H | -3.966468 | 1.675682  | 0.330601  |
| C | -4.655115 | 0.183059  | 1.721082  |
| H | -4.587751 | 0.313402  | -1.759996 |
| H | -5.636243 | -0.648868 | -0.668177 |
| F | -6.081921 | 1.335409  | -0.813022 |
| H | -4.785575 | -0.901828 | 1.773363  |
| H | -3.953773 | 0.494170  | 2.503789  |
| H | -5.621577 | 0.670641  | 1.904804  |

-----

**F-TS<sub>3</sub>**

-----

|    |           |           |           |
|----|-----------|-----------|-----------|
| Cu | -0.359803 | -0.446710 | -0.106483 |
| Cu | -2.855787 | 0.524812  | 0.150305  |
| O  | -0.148163 | 1.326906  | -1.066856 |
| O  | -1.238059 | -1.980316 | 0.908392  |
| O  | -1.243770 | -1.173250 | -1.806249 |
| O  | -0.213142 | 0.540374  | 1.668214  |
| O  | -2.265484 | 1.521174  | 1.749249  |
| O  | -3.387599 | -0.491751 | -1.456959 |
| O  | -3.280110 | -1.042754 | 1.280593  |
| O  | -2.308342 | 2.044698  | -0.991795 |
| C  | -1.084875 | 2.124157  | -1.320108 |
| C  | -2.399516 | -1.951566 | 1.383939  |
| C  | -2.462802 | -1.089205 | -2.090361 |
| C  | -1.089403 | 1.287488  | 2.167334  |
| H  | -0.816341 | 3.013816  | -1.904434 |
| H  | -0.809081 | 1.812575  | 3.089229  |
| H  | -2.783016 | -1.597765 | -3.009172 |
| H  | -2.704465 | -2.828613 | 1.970273  |
| O  | 1.507945  | -1.369272 | -0.373803 |

|   |          |           |           |
|---|----------|-----------|-----------|
| C | 2.673278 | -0.961538 | -0.218380 |
| O | 2.895920 | 0.288530  | 0.233513  |
| O | 3.738482 | -1.646401 | -0.452285 |
| C | 4.328226 | 0.612053  | 0.245683  |
| C | 5.097034 | -0.691587 | 0.113737  |
| H | 4.522329 | 1.052392  | 1.221476  |
| C | 4.619599 | 1.606397  | -0.868103 |
| H | 5.291319 | -1.285843 | 0.992458  |
| H | 5.717959 | -0.872338 | -0.748228 |
| F | 6.688598 | 0.349512  | 0.723486  |
| H | 4.417318 | 1.158522  | -1.849886 |
| H | 3.992202 | 2.498649  | -0.760397 |
| H | 5.675838 | 1.877364  | -0.802103 |

-----

**F-Int<sub>5</sub>**

-----

|    |           |           |           |
|----|-----------|-----------|-----------|
| Cu | -0.407996 | -0.425292 | -0.089976 |
| Cu | -2.899992 | 0.515621  | 0.125293  |
| O  | -0.182330 | 1.330342  | -1.076288 |
| O  | -1.254502 | -1.964312 | 0.937058  |
| O  | -1.235079 | -1.199352 | -1.791261 |
| O  | -0.264261 | 0.586334  | 1.670432  |
| O  | -2.435328 | 1.230742  | 1.907558  |
| O  | -3.290414 | -0.226433 | -1.664931 |
| O  | -3.405478 | -1.213514 | 0.950105  |
| O  | -2.258429 | 2.193015  | -0.710355 |
| C  | -1.066912 | 2.219941  | -1.144782 |
| C  | -2.481044 | -2.047505 | 1.194198  |
| C  | -2.389128 | -0.935304 | -2.208826 |
| C  | -1.223196 | 1.131450  | 2.270176  |
| H  | -0.776270 | 3.149351  | -1.648191 |
| H  | -0.989421 | 1.586127  | 3.239612  |
| H  | -2.665270 | -1.373340 | -3.175260 |
| H  | -2.806397 | -2.964898 | 1.699484  |
| O  | 1.532279  | -1.301058 | -0.303675 |
| C  | 2.677270  | -0.882106 | -0.144876 |
| O  | 2.973350  | 0.341298  | 0.269970  |
| O  | 3.748631  | -1.630366 | -0.379167 |
| C  | 4.454670  | 0.539463  | 0.258993  |
| C  | 4.973276  | -0.877883 | 0.008849  |
| H  | 4.720079  | 0.895324  | 1.249953  |
| C  | 4.814194  | 1.551945  | -0.808769 |

|   |          |           |           |
|---|----------|-----------|-----------|
| H | 5.381911 | -1.356761 | 0.893810  |
| H | 5.674574 | -0.951745 | -0.815701 |
| F | 6.963139 | 0.406381  | 0.631120  |
| H | 4.532322 | 1.189925  | -1.806901 |
| H | 4.309646 | 2.508480  | -0.628342 |
| H | 5.899938 | 1.666971  | -0.738055 |

-----

**Cu-HKUST-1/Cl**

**Cl-Int<sub>0</sub>**

-----

|    |           |           |           |
|----|-----------|-----------|-----------|
| Cu | 0.035443  | 0.248010  | -0.330121 |
| Cu | 2.541835  | -0.334101 | 0.361056  |
| O  | -0.158142 | -1.769450 | -0.009581 |
| O  | 0.838621  | 2.115822  | -0.477464 |
| O  | 0.826527  | -0.177381 | -2.171780 |
| O  | -0.066300 | 0.514983  | 1.712343  |
| O  | 2.143193  | 0.263206  | 2.206573  |
| O  | 2.876344  | -0.915438 | -1.501917 |
| O  | 3.015560  | 1.526264  | -0.137063 |
| O  | 1.928300  | -2.161090 | 0.819612  |
| C  | 0.742577  | -2.479363 | 0.503035  |
| C  | 2.073832  | 2.331854  | -0.403558 |
| C  | 1.964048  | -0.675966 | -2.349677 |
| C  | 0.930163  | 0.516361  | 2.475247  |
| H  | 0.478996  | -3.520457 | 0.709411  |
| H  | 0.734676  | 0.771119  | 3.519466  |
| H  | 2.212746  | -0.944772 | -3.378953 |
| H  | 2.395416  | 3.359867  | -0.594577 |
| O  | -2.049502 | 0.632725  | -0.787967 |
| C  | -3.112201 | 0.751937  | 0.220501  |
| C  | -4.036652 | 1.927148  | 0.069007  |
| C  | -3.121887 | -0.368196 | -0.713294 |
| H  | -2.743026 | 0.555200  | 1.225734  |
| H  | -4.966328 | 1.711465  | 0.606196  |
| H  | -3.577067 | 2.840792  | 0.468014  |
| H  | -4.286118 | 2.087033  | -0.985225 |
| Cl | -6.227615 | -0.878227 | 0.202743  |
| H  | -3.803209 | -0.343629 | -1.557962 |
| H  | -2.793764 | -1.349902 | -0.385472 |

-----

**Cl-TS<sub>1</sub>**

|    |           |           |           |
|----|-----------|-----------|-----------|
| Cu | -0.066758 | 0.325464  | -0.275567 |
| Cu | 2.462841  | -0.424604 | 0.293295  |
| O  | 0.601350  | -0.141079 | -2.153178 |
| O  | -0.059517 | 0.612109  | 1.745749  |
| O  | 0.961975  | 2.110657  | -0.437164 |
| O  | -0.289632 | -1.674491 | 0.062022  |
| O  | 1.800296  | -2.229789 | 0.765145  |
| O  | 3.103660  | 1.385098  | -0.178633 |
| O  | 2.140011  | 0.173469  | 2.147917  |
| O  | 2.643857  | -0.981908 | -1.588986 |
| C  | 1.704239  | -0.691288 | -2.392356 |
| C  | 0.964389  | 0.523162  | 2.469880  |
| C  | 2.205663  | 2.254262  | -0.408918 |
| C  | 0.577837  | -2.459656 | 0.514936  |
| H  | 1.901589  | -0.965918 | -3.437007 |
| H  | 0.235064  | -3.477793 | 0.721472  |
| H  | 2.576522  | 3.265018  | -0.608826 |
| H  | 0.839299  | 0.780704  | 3.529576  |
| O  | -2.003015 | 0.909764  | -0.729775 |
| C  | -3.073744 | 0.941743  | 0.216659  |
| C  | -3.962004 | 2.163979  | 0.142975  |
| C  | -3.357281 | -0.217688 | -0.615898 |
| H  | -2.756363 | 0.711876  | 1.239179  |
| H  | -4.865477 | 1.999202  | 0.740617  |
| H  | -3.427744 | 3.044306  | 0.523312  |
| H  | -4.259837 | 2.357317  | -0.894088 |
| Cl | -5.558927 | -1.175465 | 0.175668  |
| H  | -3.858839 | -0.081390 | -1.560257 |
| H  | -2.915367 | -1.173087 | -0.382899 |

**Cl-Int<sub>2</sub>**

|    |           |           |           |
|----|-----------|-----------|-----------|
| Cu | -0.162350 | 0.640752  | -0.627408 |
| Cu | 2.275813  | -0.587156 | 0.460203  |
| O  | -0.412065 | -1.529849 | -0.735262 |
| O  | 1.108809  | 2.265186  | 0.017067  |
| O  | 1.175987  | 0.418305  | -2.139013 |
| O  | -0.244009 | 0.147900  | 1.621915  |
| O  | 1.842951  | -0.315177 | 2.370586  |
| O  | 2.854090  | -0.929796 | -1.425221 |

|    |           |           |           |
|----|-----------|-----------|-----------|
| O  | 3.090964  | 1.187554  | 0.377711  |
| O  | 1.363496  | -2.315673 | 0.467551  |
| C  | 0.253774  | -2.410731 | -0.145801 |
| C  | 2.337018  | 2.204633  | 0.236430  |
| C  | 2.183199  | -0.311828 | -2.299923 |
| C  | 0.608759  | -0.014818 | 2.510773  |
| H  | -0.145733 | -3.430917 | -0.141721 |
| H  | 0.282334  | 0.113236  | 3.550869  |
| H  | 2.523369  | -0.424585 | -3.334301 |
| H  | 2.885648  | 3.149533  | 0.327717  |
| O  | -1.895982 | 1.329659  | -0.558475 |
| C  | -2.967752 | 0.815207  | 0.171087  |
| C  | -3.969487 | 1.937225  | 0.473116  |
| C  | -3.552160 | -0.315218 | -0.680677 |
| H  | -2.606103 | 0.392119  | 1.120906  |
| H  | -4.824892 | 1.567665  | 1.050123  |
| H  | -3.463452 | 2.723465  | 1.043698  |
| H  | -4.337977 | 2.377688  | -0.462939 |
| Cl | -5.015097 | -1.204221 | 0.152929  |
| H  | -3.963545 | 0.056890  | -1.619773 |
| H  | -2.817454 | -1.099321 | -0.850312 |

-----

#### Cl-Int<sub>4</sub>

-----

|    |           |           |           |
|----|-----------|-----------|-----------|
| Cu | 0.045030  | 0.518779  | -0.065316 |
| Cu | -2.691818 | -0.553809 | -0.011705 |
| O  | -1.026501 | 1.689726  | 1.389465  |
| O  | -0.022415 | -1.173129 | -1.449134 |
| O  | -1.047356 | 1.504972  | -1.442966 |
| O  | -0.322757 | -1.194264 | 1.432909  |
| O  | -2.539941 | -1.571356 | 1.681831  |
| O  | -3.016665 | 0.420536  | -1.734870 |
| O  | -2.069311 | -2.098247 | -1.032926 |
| O  | -3.183579 | 1.056245  | 0.978701  |
| C  | -2.268694 | 1.773720  | 1.498868  |
| C  | -0.904310 | -2.057530 | -1.540625 |
| C  | -2.123514 | 1.259803  | -2.039895 |
| C  | -1.310403 | -1.674044 | 2.014279  |
| H  | -2.673985 | 2.574186  | 2.130267  |
| H  | -1.120722 | -2.256449 | 2.925321  |
| H  | -2.303384 | 1.857155  | -2.939589 |
| H  | -0.677720 | -2.943205 | -2.145921 |

|    |          |           |           |
|----|----------|-----------|-----------|
| O  | 1.849587 | 0.587028  | 0.450979  |
| O  | 1.773660 | 3.512383  | -0.288466 |
| C  | 2.635363 | -0.543820 | 0.711158  |
| C  | 2.850252 | 3.058863  | -0.295315 |
| C  | 3.264089 | -0.925767 | -0.631648 |
| H  | 1.993960 | -1.371417 | 1.046298  |
| C  | 3.657913 | -0.236191 | 1.811487  |
| O  | 3.964075 | 2.693373  | -0.333087 |
| H  | 2.497355 | -1.168079 | -1.364452 |
| H  | 3.946237 | -0.158035 | -0.996991 |
| Cl | 4.335765 | -2.494594 | -0.533768 |
| H  | 4.320785 | 0.581719  | 1.503017  |
| H  | 3.122471 | 0.075226  | 2.715217  |
| H  | 4.269303 | -1.115459 | 2.045149  |

-----

### Cl-TS<sub>2</sub>

-----

|    |           |           |           |
|----|-----------|-----------|-----------|
| Cu | -0.039693 | 0.724583  | -0.156219 |
| Cu | -2.590223 | -0.761295 | 0.052205  |
| O  | -1.129919 | 1.655914  | 1.438958  |
| O  | 0.052948  | -0.874994 | -1.600367 |
| O  | -1.297749 | 1.610305  | -1.369541 |
| O  | -0.145134 | -1.095740 | 1.278916  |
| O  | -2.203495 | -1.957346 | 1.600241  |
| O  | -3.176707 | 0.348194  | -1.525040 |
| O  | -1.848617 | -2.075180 | -1.185911 |
| O  | -3.177563 | 0.655559  | 1.254204  |
| C  | -2.340594 | 1.498050  | 1.714009  |
| C  | -0.731737 | -1.844737 | -1.743906 |
| C  | -2.413964 | 1.295684  | -1.854406 |
| C  | -0.958031 | -1.837171 | 1.856699  |
| H  | -2.793602 | 2.167558  | 2.460178  |
| H  | -0.567157 | -2.455849 | 2.676161  |
| H  | -2.742272 | 1.950849  | -2.668678 |
| H  | -0.448322 | -2.632667 | -2.456100 |
| O  | 1.844868  | 0.785375  | 0.335514  |
| O  | 1.360933  | 2.976550  | -0.488242 |
| C  | 2.712755  | -0.301799 | 0.627609  |
| C  | 2.404909  | 2.465073  | -0.190827 |
| C  | 3.488262  | -0.593625 | -0.658047 |
| H  | 2.074147  | -1.162276 | 0.849423  |
| C  | 3.584933  | -0.004789 | 1.849603  |

|    |          |           |           |
|----|----------|-----------|-----------|
| O  | 3.597726 | 2.529240  | -0.088147 |
| H  | 2.804624 | -0.787433 | -1.482590 |
| H  | 4.208093 | 0.184899  | -0.903355 |
| Cl | 4.521261 | -2.172149 | -0.514168 |
| H  | 4.241080 | 0.851750  | 1.667512  |
| H  | 2.934123 | 0.227797  | 2.699791  |
| H  | 4.197899 | -0.876609 | 2.105841  |

-----

**Cl-Int<sub>4</sub>**

-----

|    |           |           |           |
|----|-----------|-----------|-----------|
| Cu | 0.566297  | -0.519353 | -0.169906 |
| Cu | 2.977367  | 0.714042  | 0.156639  |
| O  | 0.362660  | 0.241329  | 1.711100  |
| O  | 1.499410  | -0.929285 | -1.959089 |
| O  | 1.744983  | -2.003327 | 0.662937  |
| O  | 0.198180  | 1.354806  | -0.905980 |
| O  | 2.278532  | 2.276918  | -0.830734 |
| O  | 3.651037  | -0.856560 | 1.144423  |
| O  | 3.577690  | -0.094283 | -1.542171 |
| O  | 2.274468  | 1.474285  | 1.841753  |
| C  | 1.154872  | 1.045566  | 2.259484  |
| C  | 2.701394  | -0.703032 | -2.233318 |
| C  | 2.894063  | -1.878595 | 1.144045  |
| C  | 1.039546  | 2.261452  | -1.109808 |
| H  | 0.846816  | 1.439662  | 3.237799  |
| H  | 0.659918  | 3.170210  | -1.594386 |
| H  | 3.314646  | -2.766661 | 1.634155  |
| H  | 3.060642  | -1.076561 | -3.202697 |
| O  | -1.090929 | -1.697810 | -0.509444 |
| C  | -2.321726 | -1.470945 | -0.331913 |
| O  | -2.553149 | -0.165082 | 0.157250  |
| O  | -3.293115 | -2.210942 | -0.538825 |
| C  | -3.879322 | 0.214234  | 0.539207  |
| C  | -4.843257 | 0.081465  | -0.643129 |
| H  | -3.772198 | 1.282877  | 0.755190  |
| C  | -4.354113 | -0.506323 | 1.802562  |
| H  | -4.381552 | 0.408276  | -1.573029 |
| H  | -5.288460 | -0.901655 | -0.746317 |
| Cl | -6.314831 | 1.261868  | -0.405150 |
| H  | -4.447435 | -1.580030 | 1.617382  |
| H  | -3.628560 | -0.348096 | 2.608330  |
| H  | -5.324827 | -0.109099 | 2.123314  |

-----  
**Cl-TS<sub>3</sub>**  
-----

|    |           |           |           |
|----|-----------|-----------|-----------|
| Cu | -0.632343 | -0.488893 | -0.059771 |
| Cu | -3.084415 | 0.612458  | 0.150133  |
| O  | -0.391641 | 1.150101  | -1.234822 |
| O  | -1.543111 | -1.847114 | 1.159844  |
| O  | -1.606919 | -1.373015 | -1.632723 |
| O  | -0.392249 | 0.702329  | 1.576825  |
| O  | -2.519640 | 1.470038  | 1.835838  |
| O  | -3.594673 | -0.266917 | -1.542388 |
| O  | -3.654507 | -0.993125 | 1.154939  |
| O  | -2.396308 | 2.165596  | -0.864207 |
| C  | -1.227646 | 2.079938  | -1.351755 |
| C  | -2.762015 | -1.843853 | 1.458788  |
| C  | -2.757590 | -1.083025 | -2.039263 |
| C  | -1.297299 | 1.348516  | 2.158121  |
| H  | -0.912286 | 2.939658  | -1.957367 |
| H  | -1.000071 | 1.884468  | 3.068427  |
| H  | -3.096199 | -1.599767 | -2.946874 |
| H  | -3.114142 | -2.688432 | 2.066167  |
| O  | 1.177071  | -1.524342 | -0.251730 |
| C  | 2.368167  | -1.150450 | -0.234112 |
| O  | 2.616022  | 0.172939  | 0.012545  |
| O  | 3.399700  | -1.871621 | -0.409906 |
| C  | 4.008713  | 0.530951  | -0.173011 |
| C  | 4.883970  | -0.670110 | 0.145532  |
| H  | 4.190925  | 1.313190  | 0.562925  |
| C  | 4.221713  | 1.062399  | -1.587164 |
| H  | 4.861779  | -1.107748 | 1.130183  |
| H  | 5.496532  | -1.138147 | -0.605163 |
| Cl | 6.774209  | 0.547412  | 0.774416  |
| H  | 4.026357  | 0.277003  | -2.326925 |
| H  | 3.538912  | 1.896809  | -1.778831 |
| H  | 5.254593  | 1.408413  | -1.694610 |

-----  
**Cl-Int<sub>5</sub>**  
-----

|    |           |           |           |
|----|-----------|-----------|-----------|
| Cu | -0.732698 | -0.446836 | -0.067725 |
| Cu | -3.181774 | 0.576492  | 0.146235  |
| O  | -0.453868 | 1.262794  | -1.120555 |



|    |           |           |           |
|----|-----------|-----------|-----------|
| O  | -1.598578 | -1.926561 | 1.022753  |
| O  | -1.592969 | -1.258326 | -1.731998 |
| O  | -0.518376 | 0.618035  | 1.653337  |
| O  | -2.667926 | 1.328165  | 1.900980  |
| O  | -3.611662 | -0.209313 | -1.617425 |
| O  | -3.726924 | -1.113129 | 1.029568  |
| O  | -2.493676 | 2.206280  | -0.748636 |
| C  | -1.310065 | 2.179289  | -1.202450 |
| C  | -2.824873 | -1.964598 | 1.293446  |
| C  | -2.742417 | -0.967127 | -2.145907 |
| C  | -1.454005 | 1.207469  | 2.249056  |
| H  | -0.997243 | 3.081774  | -1.739020 |
| H  | -1.194082 | 1.685506  | 3.199746  |
| H  | -3.044800 | -1.426856 | -3.093547 |
| H  | -3.170702 | -2.854107 | 1.832223  |
| O  | 1.210643  | -1.376563 | -0.261308 |
| C  | 2.363409  | -0.973964 | -0.185127 |
| O  | 2.711290  | 0.268505  | 0.134417  |
| O  | 3.416957  | -1.758626 | -0.421626 |
| C  | 4.174368  | 0.434316  | -0.015749 |
| C  | 4.648727  | -1.022976 | -0.106431 |
| H  | 4.534002  | 0.915778  | 0.890206  |
| C  | 4.459521  | 1.280968  | -1.241764 |
| H  | 5.045457  | -1.404917 | 0.833147  |
| H  | 5.363765  | -1.202495 | -0.905447 |
| Cl | 7.298947  | 0.447526  | 0.631039  |
| H  | 4.115284  | 0.781505  | -2.156801 |
| H  | 3.956824  | 2.251276  | -1.163197 |
| H  | 5.541774  | 1.434206  | -1.288280 |

-----  
**Cu-HKUST-1/Br<sup>-</sup>**

**Br-Int<sub>1</sub>**

-----

|    |          |           |           |
|----|----------|-----------|-----------|
| Cu | 0.634589 | 0.259837  | -0.342498 |
| Cu | 3.112656 | -0.396530 | 0.368252  |
| O  | 0.292656 | -1.642883 | 0.347603  |
| O  | 1.569819 | 1.998558  | -0.848354 |
| O  | 1.300245 | -0.553489 | -2.099382 |
| O  | 0.634639 | 0.894419  | 1.622452  |
| O  | 2.840126 | 0.555410  | 2.083554  |
| O  | 3.315012 | -1.328638 | -1.366872 |

|    |           |           |           |
|----|-----------|-----------|-----------|
| O  | 3.708081  | 1.297550  | -0.475095 |
| O  | 2.377889  | -2.054028 | 1.170499  |
| C  | 1.158603  | -2.322721 | 0.953211  |
| C  | 2.820166  | 2.118756  | -0.854070 |
| C  | 2.387463  | -1.169333 | -2.216497 |
| C  | 1.663468  | 0.951318  | 2.339457  |
| H  | 0.824315  | -3.283463 | 1.353090  |
| H  | 1.537647  | 1.405040  | 3.324999  |
| H  | 2.569651  | -1.638216 | -3.185823 |
| H  | 3.210149  | 3.064681  | -1.239376 |
| O  | -1.451699 | 0.727755  | -0.789156 |
| C  | -2.454922 | 0.997031  | 0.243828  |
| C  | -3.321598 | 2.205905  | 0.023000  |
| C  | -2.564165 | -0.202111 | -0.586142 |
| H  | -2.048541 | 0.872077  | 1.246584  |
| H  | -4.241499 | 2.100662  | 0.608988  |
| H  | -2.796771 | 3.121527  | 0.323977  |
| H  | -3.605391 | 2.288669  | -1.030925 |
| Br | -6.097004 | -0.491838 | 0.081632  |
| H  | -3.284083 | -0.215442 | -1.399419 |
| H  | -2.268707 | -1.167407 | -0.184798 |

-----

**Br-TS<sub>1</sub>**

-----

|    |           |           |           |
|----|-----------|-----------|-----------|
| Cu | 0.484011  | 0.435976  | -0.401046 |
| Cu | 2.867680  | -0.583070 | 0.392508  |
| O  | -0.093767 | -1.373336 | 0.406311  |
| O  | 1.699577  | 1.952696  | -0.982486 |
| O  | 1.045879  | -0.572767 | -2.068219 |
| O  | 0.683527  | 1.142722  | 1.551898  |
| O  | 2.603296  | 0.119108  | 2.217047  |
| O  | 3.119109  | -1.277568 | -1.445823 |
| O  | 3.663524  | 1.139560  | -0.155519 |
| O  | 1.950187  | -2.250350 | 0.896369  |
| C  | 0.682192  | -2.269360 | 0.819574  |
| C  | 2.930141  | 1.999523  | -0.730120 |
| C  | 2.149297  | -1.141744 | -2.250917 |
| C  | 1.572354  | 0.844508  | 2.381248  |
| H  | 0.220371  | -3.202494 | 1.165003  |
| H  | 1.453418  | 1.261401  | 3.386014  |
| H  | 2.295492  | -1.581158 | -3.241824 |
| H  | 3.458869  | 2.907346  | -1.047293 |
| O  | -1.406979 | 1.184463  | -0.769431 |

|    |           |           |           |
|----|-----------|-----------|-----------|
| C  | -2.453717 | 1.213318  | 0.192545  |
| C  | -3.215871 | 2.520142  | 0.266016  |
| C  | -2.903523 | 0.160121  | -0.715074 |
| H  | -2.145336 | 0.856257  | 1.181471  |
| H  | -4.120327 | 2.391859  | 0.871132  |
| H  | -2.583689 | 3.296641  | 0.715100  |
| H  | -3.509165 | 2.847670  | -0.738259 |
| Br | -5.286605 | -0.702159 | 0.091521  |
| H  | -3.385379 | 0.432711  | -1.641041 |
| H  | -2.532195 | -0.844194 | -0.586777 |

-----

### Br-Int<sub>2</sub>

-----

|    |           |           |           |
|----|-----------|-----------|-----------|
| Cu | 0.349540  | 0.752012  | -0.617712 |
| Cu | 2.642213  | -0.737437 | 0.454204  |
| O  | -0.112578 | -1.375936 | -0.786829 |
| O  | 1.767902  | 2.226672  | 0.078411  |
| O  | 1.672176  | 0.442807  | -2.125237 |
| O  | 0.198221  | 0.207725  | 1.617921  |
| O  | 2.223616  | -0.472524 | 2.368962  |
| O  | 3.197484  | -1.087802 | -1.437370 |
| O  | 3.630497  | 0.948979  | 0.422001  |
| O  | 1.561248  | -2.366143 | 0.410490  |
| C  | 0.454243  | -2.333985 | -0.213767 |
| C  | 2.982375  | 2.039194  | 0.303137  |
| C  | 2.600868  | -0.382457 | -2.299490 |
| C  | 1.023162  | -0.056857 | 2.508464  |
| H  | -0.046490 | -3.308334 | -0.238258 |
| H  | 0.701403  | 0.079455  | 3.548953  |
| H  | 2.935745  | -0.502542 | -3.334791 |
| H  | 3.621422  | 2.922400  | 0.422275  |
| O  | -1.309805 | 1.605495  | -0.532024 |
| C  | -2.434413 | 1.161304  | 0.164028  |
| C  | -3.324012 | 2.360325  | 0.516414  |
| C  | -3.108815 | 0.139585  | -0.756555 |
| H  | -2.125831 | 0.657001  | 1.092401  |
| H  | -4.217403 | 2.051064  | 1.070849  |
| H  | -2.748291 | 3.063673  | 1.127624  |
| H  | -3.637837 | 2.880364  | -0.398396 |
| Br | -4.774273 | -0.764761 | 0.075164  |
| H  | -3.490183 | 0.597846  | -1.669780 |
| H  | -2.444325 | -0.693856 | -0.973840 |

-----  
**Br-Int<sub>3</sub>**  
-----

|    |           |           |           |
|----|-----------|-----------|-----------|
| Cu | -0.422568 | 0.649688  | -0.093589 |
| Cu | -2.890176 | -0.944241 | 0.005212  |
| O  | -1.756790 | 1.699460  | 1.232892  |
| O  | -0.098612 | -1.128918 | -1.318439 |
| O  | -1.637758 | 1.278413  | -1.569860 |
| O  | -0.499653 | -0.972250 | 1.545300  |
| O  | -2.604199 | -1.766718 | 1.786120  |
| O  | -3.337972 | -0.202355 | -1.804990 |
| O  | -1.934070 | -2.410236 | -0.861895 |
| O  | -3.727425 | 0.611524  | 0.837873  |
| C  | -2.994081 | 1.539702  | 1.310041  |
| C  | -0.782598 | -2.177857 | -1.348122 |
| C  | -2.619559 | 0.771842  | -2.165019 |
| C  | -1.391694 | -1.590858 | 2.149408  |
| H  | -3.574643 | 2.291411  | 1.859601  |
| H  | -1.121882 | -2.043795 | 3.112434  |
| H  | -2.879489 | 1.244303  | -3.117870 |
| H  | -0.361794 | -3.046888 | -1.867668 |
| O  | 1.312267  | 1.112169  | 0.463432  |
| O  | 0.629744  | 3.854737  | -0.556329 |
| C  | 2.293488  | 0.174301  | 0.812893  |
| C  | 1.772630  | 3.709696  | -0.362094 |
| C  | 3.033175  | -0.136826 | -0.491715 |
| H  | 1.814072  | -0.745848 | 1.175567  |
| C  | 3.188920  | 0.736097  | 1.923264  |
| O  | 2.933365  | 3.657038  | -0.203065 |
| H  | 2.353954  | -0.546105 | -1.236413 |
| H  | 3.583305  | 0.724148  | -0.872131 |
| Br | 4.480517  | -1.599973 | -0.299349 |
| H  | 3.687621  | 1.653691  | 1.587975  |
| H  | 2.565322  | 0.979917  | 2.790425  |
| H  | 3.952169  | 0.010773  | 2.227980  |

-----  
**Br-TS<sub>2</sub>**  
-----

|    |           |           |           |
|----|-----------|-----------|-----------|
| Cu | -0.528460 | 0.827980  | -0.179099 |
| Cu | -2.796821 | -1.058368 | 0.063144  |

|    |           |           |           |
|----|-----------|-----------|-----------|
| O  | -1.825517 | 1.653687  | 1.320554  |
| O  | -0.108884 | -0.818341 | -1.505305 |
| O  | -1.871912 | 1.405293  | -1.482938 |
| O  | -0.380340 | -0.890899 | 1.375710  |
| O  | -2.273807 | -2.070787 | 1.699690  |
| O  | -3.500941 | -0.169460 | -1.603105 |
| O  | -1.793263 | -2.299254 | -1.060531 |
| O  | -3.665409 | 0.307667  | 1.147180  |
| C  | -3.001833 | 1.308430  | 1.571679  |
| C  | -0.711239 | -1.916112 | -1.602547 |
| C  | -2.898590 | 0.872855  | -1.975484 |
| C  | -1.077597 | -1.722527 | 1.981170  |
| H  | -3.590985 | 1.935591  | 2.257150  |
| H  | -0.619584 | -2.211292 | 2.852043  |
| H  | -3.301789 | 1.409334  | -2.841310 |
| H  | -0.270590 | -2.686877 | -2.250640 |
| O  | 1.297577  | 1.237578  | 0.368149  |
| O  | 0.478886  | 3.247768  | -0.628145 |
| C  | 2.325406  | 0.328487  | 0.741870  |
| C  | 1.583094  | 2.947294  | -0.265842 |
| C  | 3.163838  | 0.089736  | -0.515562 |
| H  | 1.828886  | -0.607482 | 1.014738  |
| C  | 3.107970  | 0.846207  | 1.951059  |
| O  | 2.741732  | 3.226148  | -0.135973 |
| H  | 2.536704  | -0.251325 | -1.337077 |
| H  | 3.767342  | 0.950961  | -0.796205 |
| Br | 4.527903  | -1.426758 | -0.273871 |
| H  | 3.622258  | 1.783035  | 1.716529  |
| H  | 2.406923  | 1.028865  | 2.772975  |
| H  | 3.846126  | 0.105527  | 2.279622  |

-----

#### Br-Int<sub>4</sub>

-----

|    |           |           |           |
|----|-----------|-----------|-----------|
| Cu | -1.097604 | 0.541175  | -0.209480 |
| Cu | -3.428561 | -0.815823 | 0.200820  |
| O  | -0.874346 | -0.038613 | 1.733022  |
| O  | -2.027463 | 0.732770  | -2.036449 |
| O  | -2.382838 | 2.009900  | 0.479749  |
| O  | -0.596843 | -1.361559 | -0.774232 |
| O  | -2.614321 | -2.408229 | -0.640179 |
| O  | -4.218174 | 0.786535  | 1.040917  |
| O  | -4.053296 | -0.198226 | -1.567749 |

|    |           |           |           |
|----|-----------|-----------|-----------|
| O  | -2.703452 | -1.379852 | 1.952217  |
| C  | -1.620703 | -0.843336 | 2.341733  |
| C  | -3.207983 | 0.404792  | -2.301162 |
| C  | -3.528753 | 1.852139  | 0.958771  |
| C  | -1.374708 | -2.335601 | -0.907097 |
| H  | -1.302356 | -1.130171 | 3.353561  |
| H  | -0.929782 | -3.255826 | -1.307180 |
| H  | -4.013153 | 2.749781  | 1.365460  |
| H  | -3.576178 | 0.668359  | -3.302821 |
| O  | 0.485107  | 1.792130  | -0.635257 |
| C  | 1.724632  | 1.666620  | -0.421544 |
| O  | 2.031883  | 0.426294  | 0.184597  |
| O  | 2.647927  | 2.450577  | -0.679330 |
| C  | 3.371860  | 0.169332  | 0.620439  |
| C  | 4.338392  | 0.242855  | -0.564888 |
| H  | 3.320818  | -0.875074 | 0.946674  |
| C  | 3.779642  | 1.044229  | 1.807587  |
| H  | 3.915638  | -0.219131 | -1.455126 |
| H  | 4.712432  | 1.238877  | -0.774379 |
| Br | 6.030217  | -0.876484 | -0.187059 |
| H  | 3.821647  | 2.095713  | 1.510842  |
| H  | 3.043399  | 0.932928  | 2.611491  |
| H  | 4.760976  | 0.736276  | 2.188187  |

-----

**Br-TS<sub>3</sub>**

-----

|    |           |           |           |
|----|-----------|-----------|-----------|
| Cu | -1.181162 | 0.507770  | -0.047976 |
| Cu | -3.594717 | -0.698246 | -0.048297 |
| O  | -0.949080 | -0.756454 | 1.525095  |
| O  | -2.073065 | 1.463115  | -1.614123 |
| O  | -2.250136 | 1.735752  | 1.200125  |
| O  | -0.837978 | -1.061355 | -1.301926 |
| O  | -2.928520 | -1.955283 | -1.416883 |
| O  | -4.209047 | 0.582333  | 1.322981  |
| O  | -4.157203 | 0.555576  | -1.470470 |
| O  | -2.915869 | -1.895213 | 1.373183  |
| C  | -1.770401 | -1.645859 | 1.859275  |
| C  | -3.274633 | 1.331502  | -1.951742 |
| C  | -3.413294 | 1.526883  | 1.620269  |
| C  | -1.697518 | -1.875255 | -1.718254 |
| H  | -1.463370 | -2.301556 | 2.684486  |
| H  | -1.345115 | -2.622750 | -2.440209 |

|    |           |           |           |
|----|-----------|-----------|-----------|
| H  | -3.805720 | 2.253870  | 2.343242  |
| H  | -3.619165 | 1.970887  | -2.775471 |
| O  | 0.585843  | 1.628694  | -0.061014 |
| C  | 1.789835  | 1.317027  | 0.055616  |
| O  | 2.088909  | -0.020065 | 0.137711  |
| O  | 2.786113  | 2.101093  | 0.093470  |
| C  | 3.475068  | -0.277253 | 0.468209  |
| C  | 4.350969  | 0.815756  | -0.123474 |
| H  | 3.695702  | -1.224482 | -0.023646 |
| C  | 3.633233  | -0.410541 | 1.980540  |
| H  | 4.329615  | 1.006070  | -1.184484 |
| H  | 4.913105  | 1.488863  | 0.500583  |
| Br | 6.431546  | -0.498039 | -0.423320 |
| H  | 3.395949  | 0.537743  | 2.476629  |
| H  | 2.952364  | -1.180129 | 2.358712  |
| H  | 4.663699  | -0.692433 | 2.220458  |

-----

#### Br-Int<sub>5</sub>

-----

|    |           |           |           |
|----|-----------|-----------|-----------|
| Cu | 1.340568  | -0.463776 | 0.024375  |
| Cu | 3.757799  | 0.637778  | -0.131740 |
| O  | 1.065693  | 1.075336  | 1.318797  |
| O  | 2.187206  | -1.756694 | -1.295383 |
| O  | 2.278054  | -1.479990 | 1.527179  |
| O  | 1.035394  | 0.826754  | -1.521142 |
| O  | 3.161163  | 1.613606  | -1.745511 |
| O  | 4.270679  | -0.376118 | 1.488910  |
| O  | 4.298892  | -0.900390 | -1.261439 |
| O  | 3.072007  | 2.109447  | 1.007200  |
| C  | 1.908263  | 1.991155  | 1.495625  |
| C  | 3.403121  | -1.727056 | -1.610553 |
| C  | 3.436941  | -1.220803 | 1.936087  |
| C  | 1.936934  | 1.514218  | -2.061939 |
| H  | 1.601385  | 2.802772  | 2.163573  |
| H  | 1.631772  | 2.113483  | -2.925993 |
| H  | 3.784255  | -1.800184 | 2.798300  |
| H  | 3.744855  | -2.523655 | -2.280199 |
| O  | -0.591390 | -1.454945 | 0.166857  |
| C  | -1.752159 | -1.077033 | 0.179065  |
| O  | -2.142831 | 0.183871  | 0.004371  |
| O  | -2.781812 | -1.908193 | 0.373822  |
| C  | -3.594643 | 0.295005  | 0.238207  |

|    |           |           |           |
|----|-----------|-----------|-----------|
| C  | -4.034867 | -1.176269 | 0.184526  |
| H  | -4.008138 | 0.865672  | -0.591071 |
| C  | -3.839891 | 0.993667  | 1.562992  |
| H  | -4.460856 | -1.461242 | -0.777549 |
| H  | -4.718005 | -1.458381 | 0.983072  |
| Br | -7.008851 | 0.339815  | -0.398931 |
| H  | -3.445028 | 0.404892  | 2.400808  |
| H  | -3.359052 | 1.977762  | 1.570777  |
| H  | -4.920698 | 1.120527  | 1.681095  |

-----

**Cu-HKUST-1/I**

**I-Int<sub>1</sub>**

-----

|    |           |           |           |
|----|-----------|-----------|-----------|
| Cu | 1.230295  | 0.276448  | -0.334200 |
| Cu | 3.689315  | -0.447047 | 0.363531  |
| O  | 1.857505  | -0.465473 | -2.125338 |
| O  | 1.185531  | 0.843773  | 1.637825  |
| O  | 2.224189  | 2.015964  | -0.754101 |
| O  | 0.873615  | -1.656918 | 0.285594  |
| O  | 2.950522  | -2.132091 | 1.094128  |
| O  | 4.345614  | 1.262514  | -0.390123 |
| O  | 3.379714  | 0.446208  | 2.111211  |
| O  | 3.860943  | -1.298025 | -1.421519 |
| C  | 2.938453  | -1.089389 | -2.265044 |
| C  | 2.208050  | 0.852026  | 2.368420  |
| C  | 3.475819  | 2.115010  | -0.741340 |
| C  | 1.728298  | -2.373997 | 0.862845  |
| H  | 3.118140  | -1.517141 | -3.253730 |
| H  | 1.379804  | -3.345399 | 1.220107  |
| H  | 3.885274  | 3.069617  | -1.079344 |
| H  | 2.076973  | 1.267256  | 3.370103  |
| O  | -0.858761 | 0.788348  | -0.790319 |
| C  | -1.844165 | 1.096523  | 0.245348  |
| C  | -2.688161 | 2.318960  | 0.009103  |
| C  | -1.981914 | -0.116533 | -0.563944 |
| H  | -1.429677 | 0.982285  | 1.246076  |
| H  | -3.601761 | 2.253681  | 0.611031  |
| H  | -2.138559 | 3.228628  | 0.281618  |
| H  | -2.984978 | 2.385354  | -1.042375 |
| I  | -6.040288 | -0.328581 | 0.049926  |
| H  | -2.709444 | -0.131311 | -1.371083 |



H -1.698463 -1.080787 -0.150308

**I-TS<sub>1</sub>**

Cu 0.917621 0.447834 -0.268387  
Cu 3.326070 -0.645417 0.289061  
O 1.644517 0.176783 -2.163885  
O 0.841989 0.438337 1.771454  
O 2.143746 2.111620 -0.139197  
O 0.467757 -1.540244 -0.223052  
O 2.540579 -2.443498 0.021190  
O 4.089142 1.156886 0.556665  
O 2.776506 -0.691672 2.185652  
O 3.742827 -0.540470 -1.634791  
C 2.815993 -0.188615 -2.428568  
C 1.692726 -0.119480 2.510782  
C 3.332878 2.132115 0.252303  
C 1.284013 -2.490396 -0.145030  
H 3.095687 -0.214647 -3.490116  
H 0.854669 -3.492848 -0.232678  
H 3.789929 3.122558 0.348629  
H 1.482669 -0.117568 3.588101  
O -0.897530 1.336544 -0.711119  
C -1.990961 1.397990 0.185855  
C -2.703871 2.736445 0.217396  
C -2.474323 0.349347 -0.720111  
H -1.750885 1.039519 1.194383  
H -3.636702 2.657525 0.786894  
H -2.056666 3.489534 0.684256  
H -2.939253 3.066528 -0.801298  
I -5.045880 -0.504425 0.057554  
H -2.887182 0.638235 -1.675173  
H -2.122625 -0.663114 -0.591989

**I-Int<sub>2</sub>**

Cu 0.794166 0.811574 -0.606346  
Cu 2.989833 -0.828067 0.446389  
O 0.215103 -1.280378 -0.834167  
O 2.284034 2.188609 0.139740

|   |           |           |           |
|---|-----------|-----------|-----------|
| O | 2.111742  | 0.468440  | -2.109271 |
| O | 0.590068  | 0.222094  | 1.613200  |
| O | 2.567044  | -0.588707 | 2.363571  |
| O | 3.543843  | -1.161057 | -1.449018 |
| O | 4.069801  | 0.801329  | 0.465491  |
| O | 1.820351  | -2.391751 | 0.350803  |
| C | 0.722951  | -2.282760 | -0.281544 |
| C | 3.484065  | 1.928492  | 0.369951  |
| C | 2.995565  | -0.401987 | -2.297349 |
| C | 1.390066  | -0.110736 | 2.503620  |
| H | 0.169736  | -3.227030 | -0.335841 |
| H | 1.065702  | 0.016457  | 3.544437  |
| H | 3.333456  | -0.513188 | -3.332626 |
| H | 4.169661  | 2.771609  | 0.517943  |
| O | -0.815255 | 1.756282  | -0.510192 |
| C | -1.970314 | 1.359366  | 0.163569  |
| C | -2.791317 | 2.601307  | 0.534799  |
| C | -2.688782 | 0.398834  | -0.792579 |
| H | -1.699983 | 0.817625  | 1.082728  |
| H | -3.704778 | 2.337385  | 1.079927  |
| H | -2.178909 | 3.257965  | 1.161958  |
| H | -3.068406 | 3.155883  | -0.371477 |
| I | -4.540952 | -0.559690 | 0.048661  |
| H | -3.042615 | 0.903292  | -1.692879 |
| H | -2.056658 | -0.452117 | -1.038517 |

-----

### I-Int<sub>3</sub>

-----

|    |           |           |           |
|----|-----------|-----------|-----------|
| Cu | -0.841662 | 0.697275  | -0.103378 |
| Cu | -3.106819 | -1.174818 | 0.011059  |
| O  | -2.305799 | 1.611245  | 1.187444  |
| O  | -0.295104 | -1.054779 | -1.283461 |
| O  | -2.103383 | 1.146782  | -1.602684 |
| O  | -0.750381 | -0.888647 | 1.570704  |
| O  | -2.745241 | -1.928331 | 1.809006  |
| O  | -3.621709 | -0.523008 | -1.816204 |
| O  | -1.975536 | -2.531787 | -0.820626 |
| O  | -4.128690 | 0.285795  | 0.808040  |
| C  | -3.515246 | 1.304799  | 1.263607  |
| C  | -0.853541 | -2.176033 | -1.300846 |
| C  | -3.016938 | 0.519908  | -2.191979 |
| C  | -1.566746 | -1.600746 | 2.178860  |

|   |           |           |           |
|---|-----------|-----------|-----------|
| H | -4.185697 | 1.991432  | 1.795811  |
| H | -1.253085 | -2.001171 | 3.151757  |
| H | -3.322322 | 0.942155  | -3.154796 |
| H | -0.330379 | -2.999149 | -1.801828 |
| O | 0.817740  | 1.372940  | 0.468683  |
| O | -0.179835 | 3.969648  | -0.663084 |
| C | 1.896645  | 0.568852  | 0.859646  |
| C | 0.959318  | 3.996034  | -0.404942 |
| C | 2.684937  | 0.305460  | -0.429637 |
| H | 1.521869  | -0.387655 | 1.250241  |
| C | 2.701045  | 1.272749  | 1.959200  |
| O | 2.104787  | 4.114672  | -0.183503 |
| H | 2.058696  | -0.186324 | -1.171332 |
| H | 3.142523  | 1.211900  | -0.827822 |
| I | 4.413820  | -1.109890 | -0.201322 |
| H | 3.096924  | 2.228131  | 1.593927  |
| H | 2.036750  | 1.476750  | 2.806108  |
| H | 3.536562  | 0.654481  | 2.307269  |

-----

**I-TS<sub>2</sub>**

-----

|    |           |           |           |
|----|-----------|-----------|-----------|
| Cu | -0.952153 | 0.865017  | -0.191375 |
| Cu | -3.026396 | -1.232936 | 0.070135  |
| O  | -2.357127 | 1.596005  | 1.262913  |
| O  | -0.345003 | -0.768357 | -1.458514 |
| O  | -2.323702 | 1.265521  | -1.531820 |
| O  | -0.663854 | -0.788617 | 1.417137  |
| O  | -2.439175 | -2.138212 | 1.747008  |
| O  | -3.782081 | -0.469390 | -1.635396 |
| O  | -1.880262 | -2.398577 | -0.996721 |
| O  | -4.050634 | 0.069396  | 1.094942  |
| C  | -3.498552 | 1.142524  | 1.502249  |
| C  | -0.831832 | -1.923941 | -1.531941 |
| C  | -3.280422 | 0.618049  | -2.027409 |
| C  | -1.288380 | -1.666068 | 2.037100  |
| H  | -4.161558 | 1.726175  | 2.158097  |
| H  | -0.802134 | -2.081342 | 2.930567  |
| H  | -3.716946 | 1.086747  | -2.916176 |
| H  | -0.303025 | -2.664484 | -2.148432 |
| O  | 0.811153  | 1.470265  | 0.382555  |
| O  | -0.186990 | 3.344216  | -0.708379 |
| C  | 1.919696  | 0.678046  | 0.791934  |

|   |          |           |           |
|---|----------|-----------|-----------|
| C | 0.933391 | 3.176154  | -0.310924 |
| C | 2.786706 | 0.480797  | -0.455615 |
| H | 1.510994 | -0.289936 | 1.096655  |
| C | 2.634471 | 1.314343  | 1.986997  |
| O | 2.051858 | 3.581912  | -0.166235 |
| H | 2.194152 | 0.067081  | -1.269740 |
| H | 3.306220 | 1.388200  | -0.759452 |
| I | 4.415524 | -1.018965 | -0.182236 |
| H | 3.065106 | 2.283676  | 1.718801  |
| H | 1.906986 | 1.466388  | 2.791907  |
| H | 3.431438 | 0.659564  | 2.357975  |

-----

**I-Int<sub>4</sub>**

-----

|    |           |           |           |
|----|-----------|-----------|-----------|
| Cu | -1.574579 | 0.555812  | -0.222345 |
| Cu | -3.848361 | -0.886258 | 0.217889  |
| O  | -1.325294 | 0.023009  | 1.730143  |
| O  | -2.515960 | 0.674972  | -2.050216 |
| O  | -2.916167 | 1.984847  | 0.442441  |
| O  | -0.999146 | -1.336509 | -0.751958 |
| O  | -2.973860 | -2.459335 | -0.598697 |
| O  | -4.697999 | 0.698009  | 1.033346  |
| O  | -4.502848 | -0.325405 | -1.558662 |
| O  | -3.095703 | -1.390357 | 1.976083  |
| C  | -2.036060 | -0.802012 | 2.354118  |
| C  | -3.683297 | 0.296461  | -2.305558 |
| C  | -4.053200 | 1.789247  | 0.928661  |
| C  | -1.738103 | -2.342539 | -0.867772 |
| H  | -1.704282 | -1.057780 | 3.370024  |
| H  | -1.257492 | -3.251251 | -1.252611 |
| H  | -4.572955 | 2.673736  | 1.320274  |
| H  | -4.063608 | 0.526899  | -3.310901 |
| O  | -0.043954 | 1.857952  | -0.683828 |
| C  | 1.198512  | 1.791865  | -0.459521 |
| O  | 1.548984  | 0.585406  | 0.192988  |
| O  | 2.089728  | 2.604059  | -0.739399 |
| C  | 2.894415  | 0.386741  | 0.645853  |
| C  | 3.846953  | 0.400619  | -0.554214 |
| H  | 2.861023  | -0.632903 | 1.045040  |
| C  | 3.282323  | 1.348954  | 1.770889  |
| H  | 3.432377  | -0.158988 | -1.391296 |
| H  | 4.148160  | 1.397064  | -0.860965 |

|   |          |           |           |
|---|----------|-----------|-----------|
| I | 5.764061 | -0.664271 | -0.112492 |
| H | 3.320844 | 2.376625  | 1.400637  |
| H | 2.535137 | 1.289497  | 2.570253  |
| H | 4.259288 | 1.077195  | 2.188196  |

-----

**I-TS<sub>3</sub>**

-----

|    |           |           |           |
|----|-----------|-----------|-----------|
| Cu | -1.680825 | 0.508577  | -0.132153 |
| Cu | -4.057756 | -0.754021 | 0.047955  |
| O  | -1.435151 | -0.464600 | 1.634534  |
| O  | -2.576041 | 1.159693  | -1.845119 |
| O  | -2.802195 | 1.895079  | 0.883213  |
| O  | -1.277128 | -1.238167 | -1.102043 |
| O  | -3.224610 | -2.360052 | -0.741821 |
| O  | -4.838596 | 0.878588  | 0.837093  |
| O  | -4.483961 | -0.081574 | -1.762332 |
| O  | -3.515844 | -1.366268 | 1.849710  |
| C  | -2.330502 | -1.115836 | 2.227388  |
| C  | -3.673197 | 0.741769  | -2.288892 |
| C  | -4.034749 | 1.825241  | 1.104644  |
| C  | -2.034100 | -2.236994 | -1.166383 |
| H  | -2.058122 | -1.529200 | 3.207356  |
| H  | -1.618474 | -3.128129 | -1.653693 |
| H  | -4.489690 | 2.695293  | 1.596112  |
| H  | -3.983222 | 1.137543  | -3.265263 |
| O  | 0.054400  | 1.664562  | -0.312391 |
| C  | 1.263897  | 1.415798  | -0.121347 |
| O  | 1.594196  | 0.114494  | 0.177466  |
| O  | 2.236041  | 2.225266  | -0.185930 |
| C  | 2.971186  | -0.052049 | 0.589589  |
| C  | 3.854197  | 0.925937  | -0.170498 |
| H  | 3.210466  | -1.072771 | 0.290904  |
| C  | 3.084948  | 0.099141  | 2.104861  |
| H  | 3.830002  | 0.942082  | -1.248685 |
| H  | 4.382255  | 1.717489  | 0.333213  |
| I  | 6.138758  | -0.435513 | -0.252584 |
| H  | 2.827624  | 1.120175  | 2.408732  |
| H  | 2.396624  | -0.594639 | 2.598241  |
| H  | 4.108250  | -0.121986 | 2.426557  |

-----

**I-Int<sub>5</sub>**

---

|    |           |           |           |
|----|-----------|-----------|-----------|
| Cu | -1.910524 | 0.471594  | -0.016400 |
| Cu | -4.303866 | -0.681451 | -0.104240 |
| O  | -1.619170 | -0.948956 | 1.405883  |
| O  | -2.761591 | 1.635405  | -1.449562 |
| O  | -2.881005 | 1.594352  | 1.387655  |
| O  | -1.559763 | -0.938076 | -1.445217 |
| O  | -3.672486 | -1.769525 | -1.631742 |
| O  | -4.849398 | 0.447411  | 1.428091  |
| O  | -4.861160 | 0.753290  | -1.356290 |
| O  | -3.600750 | -2.045691 | 1.153701  |
| C  | -2.446738 | -1.864432 | 1.645140  |
| C  | -3.974889 | 1.561069  | -1.767680 |
| C  | -4.037604 | 1.344205  | 1.808645  |
| C  | -2.445710 | -1.678686 | -1.939817 |
| H  | -2.133928 | -2.613093 | 2.379893  |
| H  | -2.121860 | -2.340771 | -2.748987 |
| H  | -4.404615 | 1.985031  | 2.617014  |
| H  | -4.323500 | 2.293610  | -2.502977 |
| O  | 0.016061  | 1.504142  | 0.070450  |
| C  | 1.178875  | 1.146474  | 0.140497  |
| O  | 1.593992  | -0.118309 | 0.061552  |
| O  | 2.194468  | 2.004203  | 0.307749  |
| C  | 3.034112  | -0.190578 | 0.348991  |
| C  | 3.457362  | 1.280940  | 0.204794  |
| H  | 3.481239  | -0.813121 | -0.424923 |
| C  | 3.246996  | -0.791125 | 1.726989  |
| H  | 3.908493  | 1.504305  | -0.763060 |
| H  | 4.114874  | 1.626715  | 1.000868  |
| I  | 6.786935  | -0.274022 | -0.277612 |
| H  | 2.818635  | -0.151224 | 2.508588  |
| H  | 2.778210  | -1.778829 | 1.788930  |
| H  | 4.324169  | -0.896743 | 1.893140  |

---

**Catalyst: M-HKUST-1 (M = Mo, Cr, Ti, Cu, W, Sc, Fe, Ru, Zn, Cd  
and V); Co-catalyst: Br<sup>-</sup>**

**Cu-HKUST-1**

**Cu-HKUST-1**

-----  
Cu -0.000845 0.000072 -1.273814  
Cu 0.001419 -0.000084 1.274814  
O -0.331103 -1.955835 -1.137057  
O 0.328968 1.956093 -1.137254  
O 1.955459 -0.330104 -1.137144  
O -1.956996 0.330169 -1.134876  
O -1.955957 0.322800 1.137654  
O 1.958186 -0.323260 1.135367  
O 0.323352 1.957379 1.135270  
O -0.323023 -1.957200 1.135459  
C -0.418297 -2.505718 -0.000795  
C 0.416957 2.506008 -0.001076  
C 2.506060 -0.417742 -0.001308  
C -2.505706 0.417457 0.001945  
H -0.598610 -3.590763 -0.000795  
H -3.590779 0.597622 0.003049  
H 3.591099 -0.598069 -0.002001  
H 0.596455 3.591188 -0.001221  
-----

**PO**

-----  
C 1.045532 0.618438 -0.058795  
C -0.153400 -0.036372 0.488109  
O 0.829685 -0.790173 -0.242933  
H 0.961329 1.217787 -0.965972  
H 1.878173 0.875102 0.596442  
H -0.154300 -0.261705 1.557102  
C -1.513810 0.099789 -0.148751  
H -2.081234 -0.833758 -0.051389  
H -2.088544 0.897881 0.338548  
H -1.422838 0.334952 -1.214647  
-----

**PC**

---

|   |           |           |           |
|---|-----------|-----------|-----------|
| C | -2.299350 | -0.562585 | -0.264468 |
| H | -2.567309 | -1.562282 | 0.090954  |
| H | -2.158027 | -0.604602 | -1.349902 |
| H | -3.134690 | 0.113538  | -0.044825 |
| C | -1.040952 | -0.070358 | 0.423612  |
| O | 0.071393  | -0.949067 | 0.127319  |
| C | -0.506182 | 1.286954  | -0.057074 |
| H | -0.809324 | 1.512023  | -1.086753 |
| H | -0.768896 | 2.120800  | 0.596687  |
| H | -1.167957 | -0.073790 | 1.513590  |
| C | 1.210683  | -0.219455 | -0.019738 |
| O | 0.919640  | 1.112722  | -0.024243 |
| O | 2.311592  | -0.677782 | -0.129794 |

---

**Cu-Int<sub>0</sub>**

---

|    |           |           |           |
|----|-----------|-----------|-----------|
| Cu | -0.522738 | -0.085332 | -0.275052 |
| Cu | 2.027482  | 0.134211  | 0.279923  |
| O  | -0.479155 | -1.481331 | 1.180370  |
| O  | -0.116916 | 1.346561  | -1.604020 |
| O  | 0.145988  | -1.462924 | -1.572033 |
| O  | -0.685169 | 1.328771  | 1.162352  |
| O  | 1.540070  | 1.530638  | 1.588463  |
| O  | 2.354814  | -1.276146 | -1.059041 |
| O  | 2.106683  | 1.502401  | -1.145676 |
| O  | 1.732196  | -1.255923 | 1.662713  |
| C  | 0.581521  | -1.756473 | 1.809718  |
| C  | 1.045762  | 1.810708  | -1.762555 |
| C  | 1.367502  | -1.756766 | -1.688300 |
| C  | 0.319461  | 1.818929  | 1.749646  |
| H  | 0.494704  | -2.527562 | 2.583093  |
| H  | 0.112698  | 2.593559  | 2.496440  |
| H  | 1.609341  | -2.527547 | -2.428121 |
| H  | 1.152272  | 2.580856  | -2.533870 |
| O  | -2.703362 | -0.289104 | -0.610538 |
| C  | -3.693463 | 0.090141  | 0.386476  |
| C  | -4.840335 | 0.923912  | -0.119300 |
| C  | -3.509053 | -1.320833 | 0.013674  |
| H  | -3.231875 | 0.421231  | 1.315937  |
| H  | -5.656925 | 0.922668  | 0.613589  |



|   |           |           |           |
|---|-----------|-----------|-----------|
| H | -4.522048 | 1.961371  | -0.271856 |
| H | -5.220455 | 0.533990  | -1.069158 |
| H | -4.213942 | -1.789917 | -0.670826 |
| H | -2.950902 | -1.987380 | 0.666641  |

-----

### **Cu-Int<sub>1</sub>**

-----

|    |           |           |           |
|----|-----------|-----------|-----------|
| Cu | 0.634589  | 0.259837  | -0.342498 |
| Cu | 3.112656  | -0.396530 | 0.368252  |
| O  | 0.292656  | -1.642883 | 0.347603  |
| O  | 1.569819  | 1.998558  | -0.848354 |
| O  | 1.300245  | -0.553489 | -2.099382 |
| O  | 0.634639  | 0.894419  | 1.622452  |
| O  | 2.840126  | 0.555410  | 2.083554  |
| O  | 3.315012  | -1.328638 | -1.366872 |
| O  | 3.708081  | 1.297550  | -0.475095 |
| O  | 2.377889  | -2.054028 | 1.170499  |
| C  | 1.158603  | -2.322721 | 0.953211  |
| C  | 2.820166  | 2.118756  | -0.854070 |
| C  | 2.387463  | -1.169333 | -2.216497 |
| C  | 1.663468  | 0.951318  | 2.339457  |
| H  | 0.824315  | -3.283463 | 1.353090  |
| H  | 1.537647  | 1.405040  | 3.324999  |
| H  | 2.569651  | -1.638216 | -3.185823 |
| H  | 3.210149  | 3.064681  | -1.239376 |
| O  | -1.451699 | 0.727755  | -0.789156 |
| C  | -2.454922 | 0.997031  | 0.243828  |
| C  | -3.321598 | 2.205905  | 0.023000  |
| C  | -2.564165 | -0.202111 | -0.586142 |
| H  | -2.048541 | 0.872077  | 1.246584  |
| H  | -4.241499 | 2.100662  | 0.608988  |
| H  | -2.796771 | 3.121527  | 0.323977  |
| H  | -3.605391 | 2.288669  | -1.030925 |
| Br | -6.097004 | -0.491838 | 0.081632  |
| H  | -3.284083 | -0.215442 | -1.399419 |
| H  | -2.268707 | -1.167407 | -0.184798 |

-----

### **Cu-TS<sub>1</sub>**

-----

|    |          |          |           |
|----|----------|----------|-----------|
| Cu | 0.484011 | 0.435976 | -0.401046 |
|----|----------|----------|-----------|

|    |           |           |           |
|----|-----------|-----------|-----------|
| Cu | 2.867680  | -0.583070 | 0.392508  |
| O  | -0.093767 | -1.373336 | 0.406311  |
| O  | 1.699577  | 1.952696  | -0.982486 |
| O  | 1.045879  | -0.572767 | -2.068219 |
| O  | 0.683527  | 1.142722  | 1.551898  |
| O  | 2.603296  | 0.119108  | 2.217047  |
| O  | 3.119109  | -1.277568 | -1.445823 |
| O  | 3.663524  | 1.139560  | -0.155519 |
| O  | 1.950187  | -2.250350 | 0.896369  |
| C  | 0.682192  | -2.269360 | 0.819574  |
| C  | 2.930141  | 1.999523  | -0.730120 |
| C  | 2.149297  | -1.141744 | -2.250917 |
| C  | 1.572354  | 0.844508  | 2.381248  |
| H  | 0.220371  | -3.202494 | 1.165003  |
| H  | 1.453418  | 1.261401  | 3.386014  |
| H  | 2.295492  | -1.581158 | -3.241824 |
| H  | 3.458869  | 2.907346  | -1.047293 |
| O  | -1.406979 | 1.184463  | -0.769431 |
| C  | -2.453717 | 1.213318  | 0.192545  |
| C  | -3.215871 | 2.520142  | 0.266016  |
| C  | -2.903523 | 0.160121  | -0.715074 |
| H  | -2.145336 | 0.856257  | 1.181471  |
| H  | -4.120327 | 2.391859  | 0.871132  |
| H  | -2.583689 | 3.296641  | 0.715100  |
| H  | -3.509165 | 2.847670  | -0.738259 |
| Br | -5.286605 | -0.702159 | 0.091521  |
| H  | -3.385379 | 0.432711  | -1.641041 |
| H  | -2.532195 | -0.844194 | -0.586777 |

-----

### **Cu-Int<sub>2</sub>**

-----

|    |           |           |           |
|----|-----------|-----------|-----------|
| Cu | 0.349540  | 0.752012  | -0.617712 |
| Cu | 2.642213  | -0.737437 | 0.454204  |
| O  | -0.112578 | -1.375936 | -0.786829 |
| O  | 1.767902  | 2.226672  | 0.078411  |
| O  | 1.672176  | 0.442807  | -2.125237 |
| O  | 0.198221  | 0.207725  | 1.617921  |
| O  | 2.223616  | -0.472524 | 2.368962  |
| O  | 3.197484  | -1.087802 | -1.437370 |
| O  | 3.630497  | 0.948979  | 0.422001  |
| O  | 1.561248  | -2.366143 | 0.410490  |
| C  | 0.454243  | -2.333985 | -0.213767 |

|    |           |           |           |
|----|-----------|-----------|-----------|
| C  | 2.982375  | 2.039194  | 0.303137  |
| C  | 2.600868  | -0.382457 | -2.299490 |
| C  | 1.023162  | -0.056857 | 2.508464  |
| H  | -0.046490 | -3.308334 | -0.238258 |
| H  | 0.701403  | 0.079455  | 3.548953  |
| H  | 2.935745  | -0.502542 | -3.334791 |
| H  | 3.621422  | 2.922400  | 0.422275  |
| O  | -1.309805 | 1.605495  | -0.532024 |
| C  | -2.434413 | 1.161304  | 0.164028  |
| C  | -3.324012 | 2.360325  | 0.516414  |
| C  | -3.108815 | 0.139585  | -0.756555 |
| H  | -2.125831 | 0.657001  | 1.092401  |
| H  | -4.217403 | 2.051064  | 1.070849  |
| H  | -2.748291 | 3.063673  | 1.127624  |
| H  | -3.637837 | 2.880364  | -0.398396 |
| Br | -4.774273 | -0.764761 | 0.075164  |
| H  | -3.490183 | 0.597846  | -1.669780 |
| H  | -2.444325 | -0.693856 | -0.973840 |

-----

**Cu-Int<sub>3</sub>**

-----

|    |           |           |           |
|----|-----------|-----------|-----------|
| Cu | -0.422568 | 0.649688  | -0.093589 |
| Cu | -2.890176 | -0.944241 | 0.005212  |
| O  | -1.756790 | 1.699460  | 1.232892  |
| O  | -0.098612 | -1.128918 | -1.318439 |
| O  | -1.637758 | 1.278413  | -1.569860 |
| O  | -0.499653 | -0.972250 | 1.545300  |
| O  | -2.604199 | -1.766718 | 1.786120  |
| O  | -3.337972 | -0.202355 | -1.804990 |
| O  | -1.934070 | -2.410236 | -0.861895 |
| O  | -3.727425 | 0.611524  | 0.837873  |
| C  | -2.994081 | 1.539702  | 1.310041  |
| C  | -0.782598 | -2.177857 | -1.348122 |
| C  | -2.619559 | 0.771842  | -2.165019 |
| C  | -1.391694 | -1.590858 | 2.149408  |
| H  | -3.574643 | 2.291411  | 1.859601  |
| H  | -1.121882 | -2.043795 | 3.112434  |
| H  | -2.879489 | 1.244303  | -3.117870 |
| H  | -0.361794 | -3.046888 | -1.867668 |
| O  | 1.312267  | 1.112169  | 0.463432  |
| O  | 0.629744  | 3.854737  | -0.556329 |
| C  | 2.293488  | 0.174301  | 0.812893  |

|    |          |           |           |
|----|----------|-----------|-----------|
| C  | 1.772630 | 3.709696  | -0.362094 |
| C  | 3.033175 | -0.136826 | -0.491715 |
| H  | 1.814072 | -0.745848 | 1.175567  |
| C  | 3.188920 | 0.736097  | 1.923264  |
| O  | 2.933365 | 3.657038  | -0.203065 |
| H  | 2.353954 | -0.546105 | -1.236413 |
| H  | 3.583305 | 0.724148  | -0.872131 |
| Br | 4.480517 | -1.599973 | -0.299349 |
| H  | 3.687621 | 1.653691  | 1.587975  |
| H  | 2.565322 | 0.979917  | 2.790425  |
| H  | 3.952169 | 0.010773  | 2.227980  |

-----

### **Cu-TS<sub>2</sub>**

-----

|    |           |           |           |
|----|-----------|-----------|-----------|
| Cu | -0.528460 | 0.827980  | -0.179099 |
| Cu | -2.796821 | -1.058368 | 0.063144  |
| O  | -1.825517 | 1.653687  | 1.320554  |
| O  | -0.108884 | -0.818341 | -1.505305 |
| O  | -1.871912 | 1.405293  | -1.482938 |
| O  | -0.380340 | -0.890899 | 1.375710  |
| O  | -2.273807 | -2.070787 | 1.699690  |
| O  | -3.500941 | -0.169460 | -1.603105 |
| O  | -1.793263 | -2.299254 | -1.060531 |
| O  | -3.665409 | 0.307667  | 1.147180  |
| C  | -3.001833 | 1.308430  | 1.571679  |
| C  | -0.711239 | -1.916112 | -1.602547 |
| C  | -2.898590 | 0.872855  | -1.975484 |
| C  | -1.077597 | -1.722527 | 1.981170  |
| H  | -3.590985 | 1.935591  | 2.257150  |
| H  | -0.619584 | -2.211292 | 2.852043  |
| H  | -3.301789 | 1.409334  | -2.841310 |
| H  | -0.270590 | -2.686877 | -2.250640 |
| O  | 1.297577  | 1.237578  | 0.368149  |
| O  | 0.478886  | 3.247768  | -0.628145 |
| C  | 2.325406  | 0.328487  | 0.741870  |
| C  | 1.583094  | 2.947294  | -0.265842 |
| C  | 3.163838  | 0.089736  | -0.515562 |
| H  | 1.828886  | -0.607482 | 1.014738  |
| C  | 3.107970  | 0.846207  | 1.951059  |
| O  | 2.741732  | 3.226148  | -0.135973 |
| H  | 2.536704  | -0.251325 | -1.337077 |
| H  | 3.767342  | 0.950961  | -0.796205 |

|    |          |           |           |
|----|----------|-----------|-----------|
| Br | 4.527903 | -1.426758 | -0.273871 |
| H  | 3.622258 | 1.783035  | 1.716529  |
| H  | 2.406923 | 1.028865  | 2.772975  |
| H  | 3.846126 | 0.105527  | 2.279622  |

-----

**Cu-Int<sub>4</sub>**

-----

|    |           |           |           |
|----|-----------|-----------|-----------|
| Cu | -1.097604 | 0.541175  | -0.209480 |
| Cu | -3.428561 | -0.815823 | 0.200820  |
| O  | -0.874346 | -0.038613 | 1.733022  |
| O  | -2.027463 | 0.732770  | -2.036449 |
| O  | -2.382838 | 2.009900  | 0.479749  |
| O  | -0.596843 | -1.361559 | -0.774232 |
| O  | -2.614321 | -2.408229 | -0.640179 |
| O  | -4.218174 | 0.786535  | 1.040917  |
| O  | -4.053296 | -0.198226 | -1.567749 |
| O  | -2.703452 | -1.379852 | 1.952217  |
| C  | -1.620703 | -0.843336 | 2.341733  |
| C  | -3.207983 | 0.404792  | -2.301162 |
| C  | -3.528753 | 1.852139  | 0.958771  |
| C  | -1.374708 | -2.335601 | -0.907097 |
| H  | -1.302356 | -1.130171 | 3.353561  |
| H  | -0.929782 | -3.255826 | -1.307180 |
| H  | -4.013153 | 2.749781  | 1.365460  |
| H  | -3.576178 | 0.668359  | -3.302821 |
| O  | 0.485107  | 1.792130  | -0.635257 |
| C  | 1.724632  | 1.666620  | -0.421544 |
| O  | 2.031883  | 0.426294  | 0.184597  |
| O  | 2.647927  | 2.450577  | -0.679330 |
| C  | 3.371860  | 0.169332  | 0.620439  |
| C  | 4.338392  | 0.242855  | -0.564888 |
| H  | 3.320818  | -0.875074 | 0.946674  |
| C  | 3.779642  | 1.044229  | 1.807587  |
| H  | 3.915638  | -0.219131 | -1.455126 |
| H  | 4.712432  | 1.238877  | -0.774379 |
| Br | 6.030217  | -0.876484 | -0.187059 |
| H  | 3.821647  | 2.095713  | 1.510842  |
| H  | 3.043399  | 0.932928  | 2.611491  |
| H  | 4.760976  | 0.736276  | 2.188187  |

-----

**Cu-TS<sub>3</sub>**

---

|    |           |           |           |
|----|-----------|-----------|-----------|
| Cu | -1.181162 | 0.507770  | -0.047976 |
| Cu | -3.594717 | -0.698246 | -0.048297 |
| O  | -0.949080 | -0.756454 | 1.525095  |
| O  | -2.073065 | 1.463115  | -1.614123 |
| O  | -2.250136 | 1.735752  | 1.200125  |
| O  | -0.837978 | -1.061355 | -1.301926 |
| O  | -2.928520 | -1.955283 | -1.416883 |
| O  | -4.209047 | 0.582333  | 1.322981  |
| O  | -4.157203 | 0.555576  | -1.470470 |
| O  | -2.915869 | -1.895213 | 1.373183  |
| C  | -1.770401 | -1.645859 | 1.859275  |
| C  | -3.274633 | 1.331502  | -1.951742 |
| C  | -3.413294 | 1.526883  | 1.620269  |
| C  | -1.697518 | -1.875255 | -1.718254 |
| H  | -1.463370 | -2.301556 | 2.684486  |
| H  | -1.345115 | -2.622750 | -2.440209 |
| H  | -3.805720 | 2.253870  | 2.343242  |
| H  | -3.619165 | 1.970887  | -2.775471 |
| O  | 0.585843  | 1.628694  | -0.061014 |
| C  | 1.789835  | 1.317027  | 0.055616  |
| O  | 2.088909  | -0.020065 | 0.137711  |
| O  | 2.786113  | 2.101093  | 0.093470  |
| C  | 3.475068  | -0.277253 | 0.468209  |
| C  | 4.350969  | 0.815756  | -0.123474 |
| H  | 3.695702  | -1.224482 | -0.023646 |
| C  | 3.633233  | -0.410541 | 1.980540  |
| H  | 4.329615  | 1.006070  | -1.184484 |
| H  | 4.913105  | 1.488863  | 0.500583  |
| Br | 6.431546  | -0.498039 | -0.423320 |
| H  | 3.395949  | 0.537743  | 2.476629  |
| H  | 2.952364  | -1.180129 | 2.358712  |
| H  | 4.663699  | -0.692433 | 2.220458  |

---

**Cu-Int<sub>5</sub>**

---

|    |          |           |           |
|----|----------|-----------|-----------|
| Cu | 1.340568 | -0.463776 | 0.024375  |
| Cu | 3.757799 | 0.637778  | -0.131740 |
| O  | 1.065693 | 1.075336  | 1.318797  |
| O  | 2.187206 | -1.756694 | -1.295383 |

|    |           |           |           |
|----|-----------|-----------|-----------|
| O  | 2.278054  | -1.479990 | 1.527179  |
| O  | 1.035394  | 0.826754  | -1.521142 |
| O  | 3.161163  | 1.613606  | -1.745511 |
| O  | 4.270679  | -0.376118 | 1.488910  |
| O  | 4.298892  | -0.900390 | -1.261439 |
| O  | 3.072007  | 2.109447  | 1.007200  |
| C  | 1.908263  | 1.991155  | 1.495625  |
| C  | 3.403121  | -1.727056 | -1.610553 |
| C  | 3.436941  | -1.220803 | 1.936087  |
| C  | 1.936934  | 1.514218  | -2.061939 |
| H  | 1.601385  | 2.802772  | 2.163573  |
| H  | 1.631772  | 2.113483  | -2.925993 |
| H  | 3.784255  | -1.800184 | 2.798300  |
| H  | 3.744855  | -2.523655 | -2.280199 |
| O  | -0.591390 | -1.454945 | 0.166857  |
| C  | -1.752159 | -1.077033 | 0.179065  |
| O  | -2.142831 | 0.183871  | 0.004371  |
| O  | -2.781812 | -1.908193 | 0.373822  |
| C  | -3.594643 | 0.295005  | 0.238207  |
| C  | -4.034867 | -1.176269 | 0.184526  |
| H  | -4.008138 | 0.865672  | -0.591071 |
| C  | -3.839891 | 0.993667  | 1.562992  |
| H  | -4.460856 | -1.461242 | -0.777549 |
| H  | -4.718005 | -1.458381 | 0.983072  |
| Br | -7.008851 | 0.339815  | -0.398931 |
| H  | -3.445028 | 0.404892  | 2.400808  |
| H  | -3.359052 | 1.977762  | 1.570777  |
| H  | -4.920698 | 1.120527  | 1.681095  |

-----

**Zn-HKUST-1**

**Zn-HKUST-1**

-----

|    |           |           |           |
|----|-----------|-----------|-----------|
| Zn | -1.427603 | 0.013269  | -0.002662 |
| Zn | 1.427628  | -0.013411 | 0.002920  |
| O  | -1.695293 | 1.431170  | -1.361975 |
| O  | -1.728351 | -1.399448 | 1.355657  |
| O  | -0.536363 | 1.359023  | 1.409607  |
| O  | -0.557253 | -1.349903 | -1.412952 |
| O  | 1.701401  | -1.375418 | -1.411183 |
| O  | 1.722221  | 1.343841  | 1.418000  |
| O  | 0.530257  | -1.415798 | 1.355332  |
| O  | 0.563343  | 1.406549  | -1.353914 |

|   |           |           |           |
|---|-----------|-----------|-----------|
| C | -0.550368 | 1.832371  | -1.754455 |
| C | -0.592333 | -1.820779 | 1.752812  |
| C | 0.584431  | 1.748733  | 1.826965  |
| C | 0.558215  | -1.759846 | -1.824993 |
| H | -0.551557 | 2.626269  | -2.515413 |
| H | 0.562786  | -2.522308 | -2.617431 |
| H | 0.599045  | 2.510733  | 2.619711  |
| H | -0.610408 | -2.613426 | 2.514844  |

-----  
**Zn-Int<sub>0</sub>**  
 -----

|    |           |           |           |
|----|-----------|-----------|-----------|
| Zn | -2.092629 | -0.138995 | 0.456805  |
| Zn | 0.697817  | 0.119465  | -0.536692 |
| O  | -1.761104 | 0.007792  | 2.416476  |
| O  | -3.132674 | -0.349920 | -1.226228 |
| O  | -1.182194 | -2.040711 | 0.338668  |
| O  | -1.624692 | 1.892465  | 0.120238  |
| O  | 0.482557  | 2.083758  | -0.687733 |
| O  | 0.924680  | -1.848696 | -0.470390 |
| O  | -1.016495 | -0.153309 | -1.980323 |
| O  | 0.366672  | 0.203051  | 1.677147  |
| C  | -0.509622 | 0.156459  | 2.582592  |
| C  | -2.254726 | -0.302465 | -2.149542 |
| C  | -0.074298 | -2.499128 | -0.032000 |
| C  | -0.641199 | 2.541230  | -0.311835 |
| H  | -0.187435 | 0.251049  | 3.630133  |
| H  | -0.734459 | 3.627482  | -0.375000 |
| H  | 0.075791  | -3.579303 | 0.026000  |
| H  | -2.644942 | -0.403729 | -3.173190 |
| O  | 2.829616  | 0.339834  | -0.601008 |
| C  | 3.713418  | -0.178510 | 0.441834  |
| C  | 4.891169  | -0.974594 | -0.047939 |
| C  | 3.577208  | 1.271287  | 0.225227  |
| H  | 3.153594  | -0.602211 | 1.274380  |
| H  | 5.626718  | -1.084731 | 0.758471  |
| H  | 4.570969  | -1.975371 | -0.357518 |
| H  | 5.373877  | -0.482220 | -0.898264 |
| H  | 4.345868  | 1.807595  | -0.327312 |
| H  | 2.961775  | 1.867546  | 0.894115  |

-----  
**Zn-Int<sub>1</sub>**  
 -----



|    |           |           |           |
|----|-----------|-----------|-----------|
| Zn | -3.152070 | -0.428903 | -0.373044 |
| Zn | -0.225613 | 0.291269  | 0.390578  |
| O  | -2.620430 | -2.195566 | -1.223347 |
| O  | -4.624046 | 0.892471  | 0.121922  |
| O  | -2.377417 | 0.601446  | -2.018503 |
| O  | -2.840009 | -1.243726 | 1.525765  |
| O  | -0.836031 | -0.392272 | 2.169942  |
| O  | -0.384593 | 1.397617  | -1.278091 |
| O  | -2.591791 | 1.592252  | 0.750201  |
| O  | -0.555027 | -1.517259 | -0.595326 |
| C  | -1.365866 | -2.324778 | -1.124285 |
| C  | -3.833638 | 1.738919  | 0.664336  |
| C  | -1.317398 | 1.266069  | -2.126380 |
| C  | -1.902056 | -1.056039 | 2.339915  |
| H  | -0.935755 | -3.238200 | -1.543702 |
| H  | -2.008914 | -1.534075 | 3.323014  |
| H  | -1.168915 | 1.793900  | -3.078070 |
| H  | -4.288001 | 2.648120  | 1.076811  |
| O  | 1.695083  | 0.755855  | 0.832812  |
| C  | 2.815718  | 1.044639  | -0.102814 |
| C  | 3.508894  | 2.357932  | 0.109630  |
| C  | 2.972447  | -0.069627 | 0.811690  |
| H  | 2.561442  | 0.800672  | -1.132208 |
| H  | 4.498214  | 2.289292  | -0.355921 |
| H  | 2.939516  | 3.180932  | -0.339343 |
| H  | 3.645167  | 2.554692  | 1.178254  |
| Br | 5.871811  | -0.577435 | -0.215673 |
| H  | 3.548515  | 0.058681  | 1.719080  |
| H  | 2.831293  | -1.083987 | 0.459082  |

-----

### Zn-TS<sub>1</sub>

|    |          |           |           |
|----|----------|-----------|-----------|
| Zn | 3.095090 | 0.513294  | -0.324507 |
| Zn | 0.172178 | -0.387497 | 0.389738  |
| O  | 2.512388 | 2.418929  | -0.736477 |
| O  | 4.631566 | -0.834884 | -0.212098 |
| O  | 2.273058 | -0.125040 | -2.133428 |
| O  | 2.884991 | 0.896366  | 1.715900  |
| O  | 0.921082 | -0.119197 | 2.235494  |
| O  | 0.325135 | -1.100918 | -1.495002 |
| O  | 2.639888 | -1.698294 | 0.332848  |
| O  | 0.479531 | 1.588328  | -0.187181 |
| C  | 1.263596 | 2.503081  | -0.557370 |

|    |           |           |           |
|----|-----------|-----------|-----------|
| C  | 3.877357  | -1.797164 | 0.161778  |
| C  | 1.214115  | -0.769876 | -2.334938 |
| C  | 1.986731  | 0.509817  | 2.504901  |
| H  | 0.809079  | 3.478414  | -0.743637 |
| H  | 2.138265  | 0.757160  | 3.565503  |
| H  | 1.027829  | -1.078533 | -3.373665 |
| H  | 4.355494  | -2.766581 | 0.340976  |
| O  | -1.708453 | -0.940999 | 0.793959  |
| C  | -2.779648 | -1.161560 | -0.170217 |
| C  | -3.483790 | -2.487102 | -0.045374 |
| C  | -3.113445 | -0.048439 | 0.698727  |
| H  | -2.489463 | -0.904007 | -1.189861 |
| H  | -4.430631 | -2.435368 | -0.593446 |
| H  | -2.864065 | -3.292474 | -0.458424 |
| H  | -3.702212 | -2.709221 | 1.004743  |
| Br | -5.708689 | 0.664692  | -0.188594 |
| H  | -3.648204 | -0.219369 | 1.619953  |
| H  | -2.872977 | 0.964943  | 0.414534  |

-----

**Zn-Int<sub>2</sub>**

-----

|    |           |           |           |
|----|-----------|-----------|-----------|
| Zn | 2.984301  | -0.629851 | -0.001260 |
| Zn | 0.034554  | 0.704880  | -0.172377 |
| O  | 2.567570  | -1.987963 | -1.480743 |
| O  | 4.472310  | 0.008503  | 1.298309  |
| O  | 1.897081  | -1.775119 | 1.345513  |
| O  | 3.210857  | 0.845759  | -1.446214 |
| O  | 1.258396  | 1.981682  | -1.197170 |
| O  | -0.004068 | -0.539095 | 1.476601  |
| O  | 2.532582  | 1.114679  | 1.418973  |
| O  | 0.580116  | -0.907439 | -1.405933 |
| C  | 1.376541  | -1.776110 | -1.846529 |
| C  | 3.712142  | 0.910608  | 1.787690  |
| C  | 0.759596  | -1.489518 | 1.803959  |
| C  | 2.408728  | 1.787337  | -1.679888 |
| H  | 0.986814  | -2.419631 | -2.637268 |
| H  | 2.762779  | 2.533679  | -2.410750 |
| H  | 0.387016  | -2.169352 | 2.588464  |
| H  | 4.118690  | 1.544941  | 2.580675  |
| O  | -1.717176 | 1.488347  | -0.235276 |
| C  | -2.856286 | 1.012838  | 0.414215  |
| C  | -3.722329 | 2.185860  | 0.887838  |

|    |           |           |           |
|----|-----------|-----------|-----------|
| C  | -3.548797 | 0.142542  | -0.638816 |
| H  | -2.614640 | 0.377051  | 1.284102  |
| H  | -4.638329 | 1.848129  | 1.387458  |
| H  | -3.141187 | 2.797912  | 1.587158  |
| H  | -3.994182 | 2.818109  | 0.032209  |
| Br | -5.279789 | -0.802789 | 0.019500  |
| H  | -3.880016 | 0.727915  | -1.496663 |
| H  | -2.918890 | -0.688199 | -0.952053 |

-----

**Zn-Int<sub>3</sub>**

-----

|    |           |           |           |
|----|-----------|-----------|-----------|
| Zn | -3.138912 | -0.758980 | -0.007925 |
| O  | -1.408388 | 1.937109  | 0.998756  |
| O  | -0.028584 | -0.938959 | -1.221956 |
| O  | -2.492339 | 0.769762  | -1.586850 |
| O  | -0.877368 | -0.930336 | 1.622136  |
| O  | -2.906597 | -1.929516 | 1.662620  |
| O  | -4.481806 | -0.246556 | -1.507819 |
| O  | -1.979347 | -2.096510 | -1.094426 |
| O  | -3.417722 | 0.897381  | 1.215798  |
| C  | -2.602450 | 1.838310  | 1.398797  |
| C  | -0.799318 | -1.905319 | -1.486941 |
| C  | -3.643129 | 0.560565  | -2.034459 |
| C  | -1.741905 | -1.708723 | 2.101121  |
| H  | -2.987073 | 2.681809  | 1.996314  |
| H  | -1.444300 | -2.253116 | 2.999817  |
| H  | -3.950334 | 1.102833  | -2.934179 |
| H  | -0.389207 | -2.693201 | -2.140589 |
| O  | 1.658434  | 1.095351  | 0.522574  |
| O  | 0.781157  | 3.229032  | -1.180889 |
| C  | 2.698759  | 0.212994  | 0.843627  |
| C  | 1.859815  | 3.396970  | -0.759461 |
| C  | 3.321716  | -0.162991 | -0.503752 |
| H  | 2.325099  | -0.714125 | 1.315353  |
| C  | 3.685350  | 0.879812  | 1.808493  |
| O  | 2.943688  | 3.680862  | -0.413107 |
| H  | 2.587648  | -0.617848 | -1.165698 |
| H  | 3.818278  | 0.684643  | -0.976726 |
| Br | 4.812252  | -1.598122 | -0.373664 |
| H  | 4.092245  | 1.793632  | 1.358832  |
| H  | 3.153538  | 1.161374  | 2.724725  |
| H  | 4.514098  | 0.211308  | 2.070951  |

|    |           |          |          |
|----|-----------|----------|----------|
| Zn | -0.166117 | 0.497856 | 0.257598 |
|----|-----------|----------|----------|

-----

**Zn-TS<sub>2</sub>**

-----

|    |           |           |           |
|----|-----------|-----------|-----------|
| Zn | -3.057210 | -0.892205 | 0.023439  |
| O  | -1.377213 | 1.582831  | 1.558691  |
| O  | -0.273856 | -0.193243 | -1.729738 |
| O  | -2.910874 | 1.150308  | -1.024516 |
| O  | -0.502036 | -1.210243 | 1.042971  |
| O  | -2.363327 | -2.490832 | 1.112612  |
| O  | -4.735779 | -0.138146 | -0.940627 |
| O  | -2.057068 | -1.600945 | -1.653812 |
| O  | -3.191791 | 0.229149  | 1.767152  |
| C  | -2.438501 | 1.176674  | 2.110666  |
| C  | -1.012314 | -1.122169 | -2.165226 |
| C  | -4.109863 | 0.916369  | -1.299948 |
| C  | -1.153595 | -2.232791 | 1.377244  |
| H  | -2.748973 | 1.715573  | 3.020951  |
| H  | -0.606877 | -2.978080 | 1.961847  |
| H  | -4.658438 | 1.662063  | -1.886378 |
| H  | -0.701008 | -1.585764 | -3.115875 |
| O  | 1.655050  | 1.163268  | 0.425540  |
| O  | 0.436522  | 2.891178  | -0.827422 |
| C  | 2.749663  | 0.361284  | 0.794278  |
| C  | 1.618050  | 2.897577  | -0.667584 |
| C  | 3.387933  | -0.096653 | -0.520592 |
| H  | 2.384038  | -0.530678 | 1.327517  |
| C  | 3.705630  | 1.130558  | 1.711600  |
| O  | 2.730208  | 3.291381  | -0.760375 |
| H  | 2.665551  | -0.609973 | -1.152560 |
| H  | 3.867052  | 0.722247  | -1.056404 |
| Br | 4.891143  | -1.480123 | -0.261700 |
| H  | 4.094965  | 2.018485  | 1.201001  |
| H  | 3.157638  | 1.460538  | 2.601522  |
| H  | 4.548025  | 0.504856  | 2.028405  |
| Zn | -0.241213 | 0.686948  | 0.123996  |

-----

**Zn-Int<sub>4</sub>**

-----

|    |           |           |          |
|----|-----------|-----------|----------|
| Zn | -3.031279 | -1.000037 | 0.061319 |
|----|-----------|-----------|----------|

|    |           |           |           |
|----|-----------|-----------|-----------|
| O  | -4.502753 | 0.398831  | -0.239445 |
| O  | -2.693141 | -3.011570 | 0.405258  |
| O  | -2.795972 | -0.333454 | 2.013424  |
| O  | -2.600022 | -0.987584 | -1.968597 |
| O  | -0.695966 | 0.251909  | -2.011657 |
| O  | -0.875665 | 0.868298  | 1.836250  |
| O  | -0.844387 | -1.756209 | 0.294753  |
| O  | -2.662706 | 1.706124  | -0.360542 |
| C  | -3.903279 | 1.502746  | -0.388665 |
| C  | -1.425777 | -2.855884 | 0.442497  |
| C  | -1.836160 | 0.342943  | 2.465999  |
| C  | -1.597026 | -0.469048 | -2.524509 |
| H  | -4.529281 | 2.381834  | -0.561567 |
| H  | -1.500946 | -0.670426 | -3.603527 |
| H  | -1.842963 | 0.497372  | 3.557072  |
| H  | -0.811371 | -3.745623 | 0.615273  |
| O  | 0.564774  | 2.790585  | -0.361036 |
| C  | 1.741566  | 2.349053  | -0.153126 |
| O  | 1.651442  | 0.926670  | 0.007095  |
| O  | 2.827228  | 2.910768  | -0.092747 |
| C  | 2.753678  | 0.132076  | 0.495534  |
| C  | 3.875408  | 0.190717  | -0.540777 |
| H  | 2.332973  | -0.877477 | 0.503469  |
| C  | 3.157856  | 0.533210  | 1.912045  |
| H  | 3.493369  | 0.005794  | -1.543480 |
| H  | 4.447838  | 1.112916  | -0.500021 |
| Br | 5.235492  | -1.301840 | -0.233546 |
| H  | 3.581928  | 1.541130  | 1.926459  |
| H  | 2.274477  | 0.509827  | 2.558587  |
| H  | 3.898057  | -0.172350 | 2.305029  |
| Zn | -0.640939 | 1.150424  | -0.178627 |

-----

**Zn-TS<sub>3</sub>**

-----

|    |          |           |           |
|----|----------|-----------|-----------|
| Zn | 3.644553 | 0.651115  | -0.038705 |
| O  | 4.670652 | -1.115746 | -0.041975 |
| O  | 3.773697 | 2.704562  | -0.029891 |
| O  | 3.189188 | 0.362076  | 1.977487  |
| O  | 3.200446 | 0.378603  | -2.058553 |
| O  | 1.032768 | -0.296911 | -1.996964 |
| O  | 1.020110 | -0.307116 | 1.896431  |
| O  | 1.687266 | 1.901048  | -0.037450 |

|    |           |           |           |
|----|-----------|-----------|-----------|
| O  | 2.570485  | -1.960167 | -0.049772 |
| C  | 3.826009  | -2.056307 | -0.047385 |
| C  | 2.503644  | 2.851724  | -0.032513 |
| C  | 2.085944  | 0.039078  | 2.485649  |
| C  | 2.101121  | 0.057329  | -2.576576 |
| H  | 4.226322  | -3.073443 | -0.050202 |
| H  | 2.066802  | 0.076688  | -3.677015 |
| H  | 2.045131  | 0.049054  | 3.586157  |
| H  | 2.112212  | 3.875203  | -0.030119 |
| O  | -0.806496 | -1.961000 | -0.043462 |
| C  | -1.972094 | -1.495674 | 0.054668  |
| O  | -2.096546 | -0.144882 | 0.043196  |
| O  | -3.044650 | -2.158281 | 0.151992  |
| C  | -3.455344 | 0.300459  | 0.351432  |
| C  | -4.422778 | -0.797803 | -0.065381 |
| H  | -3.600488 | 1.178266  | -0.275722 |
| C  | -3.539557 | 0.659766  | 1.829289  |
| H  | -4.543700 | -1.047803 | -1.107093 |
| H  | -5.044072 | -1.303177 | 0.653861  |
| Br | -6.439936 | 0.744878  | -0.382139 |
| H  | -3.375439 | -0.226703 | 2.453315  |
| H  | -2.776023 | 1.404043  | 2.076282  |
| H  | -4.529576 | 1.072188  | 2.044970  |
| Zn | 0.838099  | -0.805914 | -0.054061 |

-----

**Zn-Int<sub>5</sub>**

-----

|    |          |           |           |
|----|----------|-----------|-----------|
| Zn | 3.858214 | 0.539004  | -0.062106 |
| O  | 4.736177 | -1.284971 | 0.134610  |
| O  | 4.052360 | 2.560108  | -0.253808 |
| O  | 3.296868 | 0.477342  | 1.954303  |
| O  | 3.381231 | 0.088287  | -2.049527 |
| O  | 1.171127 | -0.427745 | -1.988640 |
| O  | 1.088355 | -0.046255 | 1.900441  |
| O  | 1.918119 | 1.888253  | -0.233523 |
| O  | 2.581342 | -1.978061 | 0.157978  |
| C  | 3.827301 | -2.162454 | 0.201476  |
| C  | 2.793790 | 2.783249  | -0.302242 |
| C  | 2.170498 | 0.281686  | 2.473972  |
| C  | 2.277181 | -0.210027 | -2.568735 |
| H  | 4.160387 | -3.199990 | 0.309542  |
| H  | 2.263146 | -0.308090 | -3.662613 |

|    |           |           |           |
|----|-----------|-----------|-----------|
| H  | 2.110343  | 0.396001  | 3.564822  |
| H  | 2.476430  | 3.828446  | -0.410813 |
| O  | -0.804061 | -1.611738 | 0.064034  |
| C  | -1.954462 | -1.160134 | 0.105857  |
| O  | -2.237871 | 0.124713  | 0.005198  |
| O  | -3.012236 | -1.932438 | 0.257257  |
| C  | -3.700191 | 0.331867  | 0.235136  |
| C  | -4.236094 | -1.104098 | 0.125610  |
| H  | -4.058697 | 0.954497  | -0.580953 |
| C  | -3.892452 | 1.000835  | 1.580792  |
| H  | -4.690224 | -1.325532 | -0.838098 |
| H  | -4.912081 | -1.387597 | 0.927733  |
| Br | -6.972582 | 0.540015  | -0.387636 |
| H  | -3.540252 | 0.358867  | 2.398408  |
| H  | -3.348072 | 1.950455  | 1.619012  |
| H  | -4.963798 | 1.192518  | 1.696761  |
| Zn | 0.990402  | -0.631857 | -0.009705 |

-----

#### Cr-HKUST-1

#### Cr-HKUST-1

-----

|    |           |           |           |
|----|-----------|-----------|-----------|
| Cr | 0.001422  | -0.000559 | -1.424832 |
| Cr | -0.001425 | 0.000563  | 1.424845  |
| O  | 1.413974  | 1.440357  | -1.132841 |
| O  | -1.411198 | -1.441622 | -1.134226 |
| O  | -1.439670 | 1.412217  | -1.135206 |
| O  | 1.442329  | -1.412952 | -1.132096 |
| O  | 1.440726  | -1.411113 | 1.135083  |
| O  | -1.443396 | 1.411854  | 1.131968  |
| O  | -1.412874 | -1.441436 | 1.132952  |
| O  | 1.410094  | 1.442704  | 1.134334  |
| C  | 1.806196  | 1.844249  | 0.000992  |
| C  | -1.806140 | -1.844304 | -0.000884 |
| C  | -1.844297 | 1.806152  | -0.002200 |
| C  | 1.844293  | -1.806146 | 0.002081  |
| H  | 2.575205  | 2.629779  | 0.001506  |
| H  | 2.629692  | -2.575287 | 0.003275  |
| H  | -2.629697 | 2.575293  | -0.003382 |
| H  | -2.575326 | -2.629661 | -0.001398 |

-----

**Cr-Int<sub>0</sub>**

---

|    |           |           |           |
|----|-----------|-----------|-----------|
| Cr | 2.235684  | 0.105140  | 0.403339  |
| Cr | -0.537038 | -0.053910 | -0.382178 |
| O  | 1.771240  | -1.598103 | 1.414955  |
| O  | 2.214015  | 1.779132  | -0.744194 |
| O  | 1.463797  | 1.189520  | 1.942175  |
| O  | 2.520584  | -1.005897 | -1.270707 |
| O  | 0.339614  | -1.143744 | -1.884579 |
| O  | -0.726132 | 1.064747  | 1.357620  |
| O  | 0.030438  | 1.662655  | -1.353467 |
| O  | -0.417101 | -1.738575 | 0.828133  |
| C  | 0.625688  | -2.135418 | 1.422662  |
| C  | 1.179195  | 2.188108  | -1.349336 |
| C  | 0.231514  | 1.431985  | 2.096784  |
| C  | 1.572862  | -1.379121 | -2.023735 |
| H  | 0.530084  | -3.052566 | 2.016769  |
| H  | 1.859412  | -1.976779 | -2.897321 |
| H  | -0.032719 | 2.030657  | 2.977342  |
| H  | 1.296512  | 3.106171  | -1.937206 |
| O  | -2.834607 | -0.277710 | -0.668252 |
| C  | -3.810104 | 0.113961  | 0.342405  |
| C  | -4.974340 | 0.927612  | -0.155959 |
| C  | -3.622505 | -1.302319 | -0.006585 |
| H  | -3.330230 | 0.467261  | 1.254545  |
| H  | -5.773818 | 0.935925  | 0.595468  |
| H  | -4.668943 | 1.964341  | -0.337407 |
| H  | -5.373248 | 0.514489  | -1.088122 |
| H  | -4.338590 | -1.789099 | -0.666728 |
| H  | -3.044617 | -1.954937 | 0.643952  |

---

**Cr-Int<sub>1</sub>**

---

|    |          |           |           |
|----|----------|-----------|-----------|
| Cr | 3.296726 | -0.549897 | 0.374004  |
| Cr | 0.625200 | 0.380659  | -0.324894 |
| O  | 2.462750 | -2.397986 | 0.355722  |
| O  | 3.759406 | 1.429159  | 0.294174  |
| O  | 2.672032 | -0.303985 | 2.289222  |
| O  | 3.545895 | -0.662748 | -1.639048 |
| O  | 1.469739 | 0.073078  | -2.197518 |
| O  | 0.586591 | 0.423631  | 1.760478  |
| O  | 1.679452 | 2.169951  | -0.244030 |



|    |           |           |           |
|----|-----------|-----------|-----------|
| O  | 0.379891  | -1.684288 | -0.197990 |
| C  | 1.232509  | -2.564714 | 0.085558  |
| C  | 2.900821  | 2.322441  | 0.018611  |
| C  | 1.502999  | 0.109101  | 2.563428  |
| C  | 2.628069  | -0.345227 | -2.456517 |
| H  | 0.877583  | -3.602483 | 0.102788  |
| H  | 2.883198  | -0.450367 | -3.518583 |
| H  | 1.270687  | 0.201610  | 3.631667  |
| H  | 3.276199  | 3.353759  | 0.009754  |
| O  | -1.480706 | 0.938199  | -0.739932 |
| C  | -2.613810 | 1.055274  | 0.207731  |
| C  | -3.405160 | 2.329361  | 0.145194  |
| C  | -2.679974 | 0.056057  | -0.842536 |
| H  | -2.349797 | 0.703203  | 1.203741  |
| H  | -4.394033 | 2.125719  | 0.571487  |
| H  | -2.910614 | 3.134168  | 0.704639  |
| H  | -3.540881 | 2.647903  | -0.893964 |
| Br | -5.756038 | -0.599225 | 0.101860  |
| H  | -3.282737 | 0.253116  | -1.721844 |
| H  | -2.487611 | -0.985891 | -0.610849 |

-----

**Cr-TS<sub>1</sub>**

-----

|    |           |           |           |
|----|-----------|-----------|-----------|
| Cr | 3.174990  | -0.643565 | 0.343560  |
| Cr | 0.543068  | 0.467463  | -0.319201 |
| O  | 2.226507  | -2.431286 | 0.428173  |
| O  | 3.795325  | 1.284428  | 0.176716  |
| O  | 2.647902  | -0.286492 | 2.268704  |
| O  | 3.367198  | -0.857400 | -1.665169 |
| O  | 1.333444  | 0.008836  | -2.195738 |
| O  | 0.607262  | 0.584501  | 1.778435  |
| O  | 1.762608  | 2.163587  | -0.337318 |
| O  | 0.181579  | -1.586751 | -0.084746 |
| C  | 0.977590  | -2.514540 | 0.204893  |
| C  | 2.997638  | 2.229103  | -0.113127 |
| C  | 1.523407  | 0.227518  | 2.561169  |
| C  | 2.448230  | -0.504027 | -2.467681 |
| H  | 0.550784  | -3.521958 | 0.275070  |
| H  | 2.663506  | -0.670895 | -3.530256 |
| H  | 1.338696  | 0.375073  | 3.632299  |
| H  | 3.451302  | 3.226155  | -0.173566 |
| O  | -1.461834 | 1.153937  | -0.694379 |

|    |           |           |           |
|----|-----------|-----------|-----------|
| C  | -2.561589 | 1.254385  | 0.215266  |
| C  | -3.328764 | 2.556749  | 0.158418  |
| C  | -2.921440 | 0.155490  | -0.668709 |
| H  | -2.302936 | 0.960997  | 1.238576  |
| H  | -4.269270 | 2.453197  | 0.710764  |
| H  | -2.733928 | 3.367416  | 0.598641  |
| H  | -3.560460 | 2.818079  | -0.880485 |
| Br | -5.396765 | -0.714169 | 0.082224  |
| H  | -3.389970 | 0.366067  | -1.616970 |
| H  | -2.584713 | -0.846695 | -0.455310 |

-----

### Cr-Int<sub>2</sub>

-----

|    |           |           |           |
|----|-----------|-----------|-----------|
| Cr | 2.695475  | -1.032507 | 0.341078  |
| Cr | 0.518772  | 1.163079  | -0.419208 |
| O  | 1.427710  | -2.395098 | 1.185556  |
| O  | 4.007309  | 0.325296  | -0.500529 |
| O  | 2.800567  | -0.026323 | 2.067402  |
| O  | 2.368448  | -1.801463 | -1.473267 |
| O  | 0.921465  | -0.183171 | -2.177924 |
| O  | 1.115671  | 1.469694  | 1.703189  |
| O  | 2.403242  | 1.886170  | -0.826470 |
| O  | -0.123182 | -0.939211 | 0.451576  |
| C  | 0.226962  | -1.991262 | 1.020528  |
| C  | 3.583157  | 1.455941  | -0.871204 |
| C  | 2.020015  | 0.929213  | 2.379942  |
| C  | 1.591857  | -1.231944 | -2.307318 |
| H  | -0.575569 | -2.628952 | 1.416448  |
| H  | 1.537575  | -1.769886 | -3.260012 |
| H  | 2.202433  | 1.301859  | 3.393837  |
| H  | 4.315364  | 2.160868  | -1.283130 |
| O  | -1.325959 | 1.649243  | -0.521787 |
| C  | -2.462141 | 1.222428  | 0.162480  |
| C  | -3.415777 | 2.399814  | 0.396821  |
| C  | -3.047428 | 0.128594  | -0.731398 |
| H  | -2.202185 | 0.771593  | 1.134961  |
| H  | -4.326081 | 2.090396  | 0.924158  |
| H  | -2.902543 | 3.163716  | 0.992338  |
| H  | -3.698003 | 2.851458  | -0.563637 |
| Br | -4.728590 | -0.807529 | 0.060129  |
| H  | -3.393372 | 0.518579  | -1.688726 |
| H  | -2.340942 | -0.687638 | -0.856677 |

-----  
**Cr-Int<sub>3</sub>**  
-----

|    |           |           |           |
|----|-----------|-----------|-----------|
| Cr | -2.908866 | -1.175006 | -0.312024 |
| O  | -1.737765 | -2.829837 | -0.596537 |
| O  | -4.135030 | 0.469651  | -0.032465 |
| O  | -2.638570 | -0.613812 | -2.209052 |
| O  | -2.929857 | -1.496747 | 1.662706  |
| O  | -1.133620 | -0.219706 | 2.257279  |
| O  | -1.078723 | 0.999156  | -1.789068 |
| O  | -2.420101 | 1.771125  | 0.655805  |
| O  | -0.096761 | -1.320636 | -0.304095 |
| C  | -0.512789 | -2.474838 | -0.524270 |
| C  | -3.628300 | 1.545064  | 0.394783  |
| C  | -1.826743 | 0.315478  | -2.524453 |
| C  | -2.077615 | -1.014314 | 2.474969  |
| H  | 0.249415  | -3.254620 | -0.668661 |
| H  | -2.231527 | -1.371711 | 3.499345  |
| H  | -1.820230 | 0.512234  | -3.602273 |
| H  | -4.301015 | 2.395147  | 0.566269  |
| Cr | -0.589450 | 0.883947  | 0.404600  |
| O  | 1.313955  | 1.185663  | 0.536854  |
| O  | 0.433229  | 3.792255  | -0.256350 |
| C  | 2.331680  | 0.289920  | 0.885656  |
| C  | 1.555509  | 3.597657  | -0.527509 |
| C  | 2.955493  | -0.116825 | -0.449764 |
| H  | 1.915486  | -0.612896 | 1.360177  |
| C  | 3.320028  | 0.949645  | 1.854348  |
| O  | 2.681455  | 3.527795  | -0.845070 |
| H  | 2.213750  | -0.584553 | -1.091595 |
| H  | 3.460852  | 0.712927  | -0.943143 |
| Br | 4.429440  | -1.567059 | -0.279416 |
| H  | 3.767041  | 1.840373  | 1.394393  |
| H  | 2.782057  | 1.262986  | 2.756713  |
| H  | 4.124069  | 0.262592  | 2.143886  |

-----  
**Cr-TS<sub>2</sub>**  
-----

|    |           |           |           |
|----|-----------|-----------|-----------|
| Cr | -2.830538 | -1.268938 | -0.133756 |
| O  | -1.591427 | -2.901289 | -0.094061 |

|    |           |           |           |
|----|-----------|-----------|-----------|
| O  | -4.112055 | 0.351755  | -0.169543 |
| O  | -2.603670 | -1.101327 | -2.110933 |
| O  | -2.847114 | -1.200490 | 1.872344  |
| O  | -1.168382 | 0.306077  | 2.216261  |
| O  | -1.131204 | 0.632883  | -1.969896 |
| O  | -2.501780 | 1.885415  | 0.251190  |
| O  | -0.058186 | -1.260528 | -0.033338 |
| C  | -0.392962 | -2.461906 | -0.060778 |
| C  | -3.686255 | 1.522184  | 0.036179  |
| C  | -1.828443 | -0.205147 | -2.582570 |
| C  | -2.053806 | -0.504988 | 2.579606  |
| H  | 0.418763  | -3.204952 | -0.056179 |
| H  | -2.196308 | -0.663054 | 3.655001  |
| H  | -1.805680 | -0.204044 | -3.679038 |
| H  | -4.420600 | 2.337972  | 0.032665  |
| Cr | -0.647283 | 1.059681  | 0.226979  |
| O  | 1.314622  | 1.313318  | 0.405196  |
| O  | 0.280363  | 3.303742  | -0.588662 |
| C  | 2.361252  | 0.449217  | 0.788045  |
| C  | 1.455542  | 3.099540  | -0.539167 |
| C  | 2.986336  | -0.039008 | -0.519033 |
| H  | 1.925539  | -0.417919 | 1.301259  |
| C  | 3.338668  | 1.156329  | 1.732075  |
| O  | 2.604505  | 3.328094  | -0.714747 |
| H  | 2.237787  | -0.525616 | -1.139468 |
| H  | 3.512234  | 0.749547  | -1.055768 |
| Br | 4.414506  | -1.497541 | -0.238017 |
| H  | 3.805435  | 2.016303  | 1.239302  |
| H  | 2.789293  | 1.516812  | 2.609402  |
| H  | 4.126152  | 0.472552  | 2.069400  |

-----

**Cr-Int<sub>4</sub>**

-----

|    |           |           |           |
|----|-----------|-----------|-----------|
| Cr | -2.898149 | -1.255967 | -0.009187 |
| O  | -1.562745 | -2.725200 | -0.283941 |
| O  | -4.118494 | 0.332886  | 0.288255  |
| O  | -3.262307 | -1.169814 | -2.002941 |
| O  | -2.523022 | -1.283760 | 2.002076  |
| O  | -1.030183 | 0.425019  | 2.118264  |
| O  | -1.612468 | 0.362903  | -1.902363 |
| O  | -2.583763 | 2.016547  | 0.336463  |
| O  | 0.070414  | -1.175655 | -0.014328 |

|    |           |           |           |
|----|-----------|-----------|-----------|
| C  | -0.349079 | -2.328359 | -0.236686 |
| C  | -3.746016 | 1.536411  | 0.371203  |
| C  | -2.451765 | -0.323357 | -2.517026 |
| C  | -1.731918 | -0.502738 | 2.599876  |
| H  | 0.386428  | -3.117748 | -0.419331 |
| H  | -1.649871 | -0.651129 | 3.684566  |
| H  | -2.518379 | -0.208339 | -3.609338 |
| H  | -4.554444 | 2.258404  | 0.495050  |
| Cr | -0.718118 | 1.188538  | 0.213310  |
| O  | 1.441681  | 1.389505  | 0.294709  |
| O  | 0.202836  | 2.707802  | -0.918964 |
| C  | 2.629882  | 0.647931  | 0.660311  |
| C  | 1.425213  | 2.451744  | -0.706334 |
| C  | 3.171004  | -0.017499 | -0.602410 |
| H  | 2.234753  | -0.131384 | 1.316093  |
| C  | 3.617523  | 1.531474  | 1.417565  |
| O  | 2.474065  | 2.890492  | -1.147133 |
| H  | 2.380504  | -0.571528 | -1.104247 |
| H  | 3.677919  | 0.675381  | -1.269191 |
| Br | 4.568768  | -1.429026 | -0.140280 |
| H  | 4.008278  | 2.321794  | 0.771420  |
| H  | 3.111458  | 1.992943  | 2.272853  |
| H  | 4.449706  | 0.926368  | 1.793176  |

-----

### Cr-TS<sub>3</sub>

|    |           |           |           |
|----|-----------|-----------|-----------|
| Cr | -3.952503 | -0.693014 | -0.089957 |
| O  | -3.178453 | -1.911804 | -1.515284 |
| O  | -4.401359 | 0.669968  | 1.344517  |
| O  | -4.341215 | 0.699822  | -1.512298 |
| O  | -3.235110 | -1.940073 | 1.340727  |
| O  | -1.156551 | -1.023687 | 1.412041  |
| O  | -2.270555 | 1.635953  | -1.469360 |
| O  | -2.329405 | 1.601264  | 1.417516  |
| O  | -1.101766 | -0.990414 | -1.476277 |
| C  | -1.967850 | -1.802452 | -1.886547 |
| C  | -3.529141 | 1.490125  | 1.771598  |
| C  | -3.452664 | 1.531014  | -1.880231 |
| C  | -2.041695 | -1.841919 | 1.765927  |
| H  | -1.646852 | -2.509356 | -2.662388 |

|    |           |           |           |
|----|-----------|-----------|-----------|
| H  | -1.757000 | -2.566973 | 2.539276  |
| H  | -3.767234 | 2.242757  | -2.654650 |
| H  | -3.877037 | 2.184914  | 2.547362  |
| O  | 0.631814  | 1.564568  | 0.033514  |
| C  | 1.841004  | 1.262329  | 0.127945  |
| O  | 2.154217  | -0.072337 | 0.101664  |
| O  | 2.826862  | 2.052509  | 0.233029  |
| C  | 3.544964  | -0.338730 | 0.415777  |
| C  | 4.402314  | 0.822118  | -0.063494 |
| H  | 3.784398  | -1.230477 | -0.162858 |
| C  | 3.693947  | -0.612102 | 1.909595  |
| H  | 4.402775  | 1.097529  | -1.105840 |
| H  | 4.952870  | 1.440046  | 0.624623  |
| Br | 6.518758  | -0.438767 | -0.444850 |
| H  | 3.438775  | 0.281266  | 2.491534  |
| H  | 3.023000  | -1.424376 | 2.207661  |
| H  | 4.727026  | -0.899737 | 2.129759  |
| Cr | -1.262930 | 0.501047  | -0.019479 |

-----

**Cr-Int<sub>5</sub>**

-----

|    |           |           |           |
|----|-----------|-----------|-----------|
| Cr | -4.111930 | 0.618453  | 0.160219  |
| O  | -3.376802 | 1.655786  | 1.742141  |
| O  | -4.472502 | -0.566920 | -1.450496 |
| O  | -4.427954 | -0.976865 | 1.377064  |
| O  | -3.418702 | 2.064740  | -1.084331 |
| O  | -1.312989 | 1.232585  | -1.264429 |
| O  | -2.322084 | -1.816363 | 1.230336  |
| O  | -2.370510 | -1.412956 | -1.616313 |
| O  | -1.267151 | 0.829162  | 1.590013  |
| C  | -2.164202 | 1.546513  | 2.103581  |
| C  | -3.571901 | -1.294996 | -1.971029 |
| C  | -3.511069 | -1.814285 | 1.641946  |
| C  | -2.223282 | 2.065191  | -1.512499 |
| H  | -1.868806 | 2.153375  | 2.969176  |
| H  | -1.958197 | 2.895275  | -2.180032 |
| H  | -3.797811 | -2.634811 | 2.312781  |
| H  | -3.886865 | -1.892629 | -2.836741 |
| O  | 0.634586  | -1.350916 | -0.216966 |
| C  | 1.809527  | -0.996659 | -0.218732 |
| O  | 2.212581  | 0.248865  | -0.000581 |
| O  | 2.815106  | -1.836742 | -0.444442 |

|    |           |           |           |
|----|-----------|-----------|-----------|
| C  | 3.677866  | 0.347210  | -0.220860 |
| C  | 4.092483  | -1.131440 | -0.233397 |
| H  | 4.094606  | 0.869161  | 0.637603  |
| C  | 3.937434  | 1.103384  | -1.509318 |
| H  | 4.518252  | -1.466804 | 0.711138  |
| H  | 4.760080  | -1.394968 | -1.050065 |
| Br | 6.989492  | 0.286416  | 0.420061  |
| H  | 3.535889  | 0.561794  | -2.375827 |
| H  | 3.476248  | 2.096455  | -1.471166 |
| H  | 5.021972  | 1.211712  | -1.610867 |
| Cr | -1.402961 | -0.449105 | -0.042812 |

-----

**Ti-HKUST-1**

**Ti-HKUST-1**

-----

|    |           |           |           |
|----|-----------|-----------|-----------|
| Ti | 0.000456  | 0.000483  | 1.279484  |
| Ti | -0.000459 | -0.000266 | -1.278246 |
| O  | -2.058875 | -0.047743 | 1.126889  |
| O  | 2.059649  | 0.049129  | 1.125874  |
| O  | -0.047622 | 2.018059  | 1.114898  |
| O  | 0.048925  | -2.017412 | 1.115911  |
| O  | 0.047538  | -2.017168 | -1.116256 |
| O  | -0.048870 | 2.016879  | -1.117262 |
| O  | 2.057506  | 0.047105  | -1.126559 |
| O  | -2.058226 | -0.049106 | -1.125537 |
| C  | -2.647072 | -0.062002 | 0.000771  |
| C  | 2.647097  | 0.061490  | -0.000641 |
| C  | -0.063527 | 2.621393  | -0.001267 |
| C  | 0.063495  | -2.621198 | -0.000008 |
| H  | -3.744352 | -0.086816 | 0.000226  |
| H  | 0.090836  | -3.716637 | -0.000330 |
| H  | -0.090949 | 3.716826  | -0.001973 |
| H  | 3.744388  | 0.085811  | -0.001959 |

-----

**Ti-Int<sub>0</sub>**

-----

|    |           |           |           |
|----|-----------|-----------|-----------|
| Ti | -0.369953 | -0.061009 | -0.480603 |
| Ti | 2.052163  | 0.133029  | 0.552695  |
| O  | 0.264968  | 1.421720  | -1.755455 |
| O  | -0.607027 | -1.548085 | 1.003064  |
| O  | -0.835644 | 1.403851  | 0.962656  |
| O  | 0.493717  | -1.475203 | -1.716985 |

|   |           |           |           |
|---|-----------|-----------|-----------|
| O | 2.554783  | -1.286506 | -0.821414 |
| O | 1.256458  | 1.533107  | 1.799636  |
| O | 1.465402  | -1.313721 | 1.846072  |
| O | 2.330562  | 1.541025  | -0.878978 |
| C | 1.424187  | 1.914994  | -1.690633 |
| C | 0.315751  | -1.854909 | 1.805028  |
| C | 0.034023  | 1.881252  | 1.741718  |
| C | 1.710425  | -1.799748 | -1.623730 |
| H | 1.672798  | 2.726382  | -2.375136 |
| H | 2.074249  | -2.589507 | -2.279718 |
| H | -0.280514 | 2.665382  | 2.430240  |
| H | 0.120731  | -2.650890 | 2.525721  |
| O | -2.586141 | -0.308846 | -0.687476 |
| C | -3.634941 | 0.034813  | 0.272886  |
| C | -4.719658 | 0.936402  | -0.249482 |
| C | -3.463382 | -1.354151 | -0.178267 |
| H | -3.214116 | 0.295332  | 1.242043  |
| H | -5.580336 | 0.915127  | 0.430665  |
| H | -4.360663 | 1.969621  | -0.310844 |
| H | -5.050861 | 0.620909  | -1.244150 |
| H | -4.130277 | -1.755815 | -0.938742 |
| H | -2.954664 | -2.071647 | 0.459836  |

-----

### Ti-Int<sub>1</sub>

|    |          |           |           |
|----|----------|-----------|-----------|
| Ti | 0.714106 | 0.315180  | -0.383162 |
| Ti | 3.346076 | -0.528533 | 0.490539  |
| O  | 1.676127 | 2.182138  | -0.510293 |
| O  | 0.313457 | -1.742883 | -0.052299 |
| O  | 0.470107 | 0.633267  | 1.713247  |
| O  | 1.499028 | -0.168910 | -2.280162 |
| O  | 3.516920 | -0.813200 | -1.505206 |
| O  | 2.545879 | -0.044196 | 2.279040  |
| O  | 2.393928 | -2.306228 | 0.605332  |
| O  | 3.692659 | 1.443152  | 0.174535  |
| C  | 2.887412 | 2.354346  | -0.209639 |
| C  | 1.176519 | -2.574346 | 0.327332  |
| C  | 1.385021 | 0.416180  | 2.547354  |
| C  | 2.662638 | -0.624824 | -2.434075 |
| H  | 3.292137 | 3.374312  | -0.272637 |
| H  | 2.978597 | -0.895482 | -3.450602 |
| H  | 1.185284 | 0.644697  | 3.603070  |
| H  | 0.871489 | -3.625404 | 0.424938  |



|    |           |           |           |
|----|-----------|-----------|-----------|
| O  | -1.316141 | 0.693614  | -0.708661 |
| C  | -2.480481 | 1.002200  | 0.162109  |
| C  | -3.170173 | 2.307923  | -0.102732 |
| C  | -2.578852 | -0.122898 | -0.752378 |
| H  | -2.265915 | 0.769918  | 1.202691  |
| H  | -4.183768 | 2.234235  | 0.306887  |
| H  | -2.633476 | 3.142078  | 0.366393  |
| H  | -3.249837 | 2.492358  | -1.179353 |
| Br | -5.639361 | -0.510612 | 0.107185  |
| H  | -3.120864 | -0.003757 | -1.682755 |
| H  | -2.448231 | -1.133285 | -0.384465 |

-----

**Ti-TS<sub>1</sub>**

-----

|    |           |           |           |
|----|-----------|-----------|-----------|
| Ti | 0.662261  | 0.364678  | -0.381756 |
| Ti | 3.273365  | -0.605689 | 0.472933  |
| O  | 1.725357  | 2.167342  | -0.490765 |
| O  | 0.201347  | -1.676160 | -0.042221 |
| O  | 0.446484  | 0.687523  | 1.729307  |
| O  | 1.417866  | -0.138371 | -2.296081 |
| O  | 3.404122  | -0.885387 | -1.524176 |
| O  | 2.495461  | -0.097579 | 2.263385  |
| O  | 2.256266  | -2.352797 | 0.588636  |
| O  | 3.721784  | 1.351338  | 0.165013  |
| C  | 2.947201  | 2.293083  | -0.206372 |
| C  | 1.024279  | -2.554599 | 0.322745  |
| C  | 1.361508  | 0.418608  | 2.547242  |
| C  | 2.556766  | -0.651793 | -2.449966 |
| H  | 3.386565  | 3.299274  | -0.274056 |
| H  | 2.859356  | -0.939037 | -3.465878 |
| H  | 1.190294  | 0.649631  | 3.607512  |
| H  | 0.662813  | -3.588979 | 0.415520  |
| O  | -1.305993 | 0.836166  | -0.698128 |
| C  | -2.424599 | 1.138413  | 0.166107  |
| C  | -3.070286 | 2.482778  | -0.059672 |
| C  | -2.779839 | -0.006923 | -0.658727 |
| H  | -2.206715 | 0.920382  | 1.213203  |
| H  | -4.044968 | 2.497892  | 0.439867  |
| H  | -2.438790 | 3.283915  | 0.344005  |
| H  | -3.225604 | 2.660678  | -1.129611 |
| Br | -5.416054 | -0.584864 | 0.093358  |
| H  | -3.233828 | 0.144693  | -1.625535 |

H -2.562728 -1.009968 -0.326340

-----  
**Ti-Int<sub>2</sub>**

-----  
Ti 0.586191 0.551062 -0.405218  
Ti 3.095021 -0.767675 0.481835  
O 1.831473 2.224578 -0.175757  
O 0.031594 -1.506320 -0.533437  
O 0.325005 0.525578 1.709255  
O 1.539099 0.284496 -2.248270  
O 3.430725 -0.748620 -1.565943  
O 2.218134 -0.541506 2.342118  
O 1.936261 -2.462576 0.231361  
O 3.698895 1.212306 0.602996  
C 3.007390 2.220985 0.285250  
C 0.749593 -2.490460 -0.202339  
C 1.110796 0.027461 2.561135  
C 2.651804 -0.281776 -2.443935  
H 3.477913 3.200800 0.428667  
H 2.972006 -0.381283 -3.488179  
H 0.800854 0.099615 3.610923  
H 0.294678 -3.482703 -0.306155  
O -1.188011 1.160102 -0.598861  
C -2.437915 1.061787 0.027417  
C -3.186352 2.393411 -0.070685  
C -3.132887 -0.093036 -0.693960  
H -2.305528 0.793552 1.087394  
H -4.165571 2.343822 0.419895  
H -2.589020 3.177342 0.407685  
H -3.329644 2.669437 -1.123521  
Br -4.953847 -0.600424 0.135781  
H -3.371866 0.151658 -1.729124  
H -2.545803 -1.006446 -0.630480  
-----

**Ti-Int<sub>3</sub>**

-----  
Ti -3.098176 -1.040715 -0.393445  
O -1.514714 1.700634 -0.977950  
O -0.562259 -1.472298 1.488160  
O -0.090998 -0.796461 -1.405114  
O -1.989387 1.038394 1.751121

|    |           |           |           |
|----|-----------|-----------|-----------|
| O  | -3.937193 | 0.018722  | 1.205869  |
| O  | -1.997492 | -1.911330 | -1.923820 |
| O  | -2.440215 | -2.569117 | 0.838477  |
| O  | -3.452980 | 0.670671  | -1.542447 |
| C  | -2.601770 | 1.604459  | -1.615291 |
| C  | -1.366883 | -2.438936 | 1.505057  |
| C  | -0.780081 | -1.594557 | -2.092164 |
| C  | -3.207885 | 0.762973  | 1.926758  |
| H  | -2.826011 | 2.411871  | -2.317061 |
| H  | -3.678613 | 1.209208  | 2.806929  |
| H  | -0.272800 | -2.060387 | -2.942195 |
| H  | -1.125240 | -3.263161 | 2.182217  |
| O  | 1.113656  | 0.705881  | 0.721144  |
| O  | 0.432514  | 4.041260  | 0.545653  |
| C  | 2.324737  | 0.046767  | 0.985564  |
| C  | 1.009525  | 3.669063  | -0.400674 |
| C  | 3.028490  | -0.028183 | -0.368240 |
| H  | 2.122538  | -0.976778 | 1.339037  |
| C  | 3.119295  | 0.799627  | 2.056271  |
| O  | 1.608102  | 3.360522  | -1.358334 |
| H  | 2.413615  | -0.542024 | -1.102974 |
| H  | 3.342304  | 0.950633  | -0.730400 |
| Br | 4.781195  | -1.128287 | -0.320196 |
| H  | 3.347778  | 1.818067  | 1.714986  |
| H  | 2.514802  | 0.874548  | 2.966891  |
| H  | 4.060189  | 0.289804  | 2.294863  |
| Ti | -0.708424 | 0.293259  | 0.314753  |

-----

### Ti-TS<sub>2</sub>

|    |           |           |           |
|----|-----------|-----------|-----------|
| Ti | -2.964482 | -1.198017 | 0.015662  |
| O  | -1.742376 | 1.030441  | -1.832110 |
| O  | -0.558536 | -0.352684 | 1.853938  |
| O  | 0.013106  | -1.098060 | -1.005297 |
| O  | -2.285106 | 1.745786  | 0.884084  |
| O  | -4.053540 | 0.335702  | 0.903705  |
| O  | -1.704047 | -2.569741 | -0.875592 |
| O  | -2.258030 | -1.850521 | 1.845385  |
| O  | -3.506916 | -0.384477 | -1.820982 |
| C  | -2.766182 | 0.504790  | -2.343231 |
| C  | -1.242616 | -1.279786 | 2.355048  |
| C  | -0.527011 | -2.215725 | -1.200727 |

|    |           |           |           |
|----|-----------|-----------|-----------|
| C  | -3.470620 | 1.431819  | 1.169997  |
| H  | -3.040168 | 0.843019  | -3.347055 |
| H  | -4.056073 | 2.178613  | 1.713847  |
| H  | 0.076714  | -2.969339 | -1.715571 |
| H  | -0.939040 | -1.633615 | 3.345753  |
| O  | 1.154144  | 1.122433  | 0.222398  |
| O  | 0.101349  | 3.147594  | -0.555093 |
| C  | 2.254564  | 0.343161  | 0.663122  |
| C  | 1.265719  | 2.943942  | -0.363236 |
| C  | 3.142305  | 0.151654  | -0.566030 |
| H  | 1.862616  | -0.637193 | 0.961383  |
| C  | 2.950448  | 0.983073  | 1.866826  |
| O  | 2.410147  | 3.279028  | -0.359623 |
| H  | 2.574785  | -0.291910 | -1.380884 |
| H  | 3.648502  | 1.065287  | -0.871755 |
| Br | 4.669695  | -1.190436 | -0.242495 |
| H  | 3.374170  | 1.957750  | 1.604443  |
| H  | 2.213840  | 1.123667  | 2.665314  |
| H  | 3.753230  | 0.337250  | 2.241468  |
| Ti | -0.813205 | 0.619388  | -0.029604 |

-----

**Ti-Int<sub>4</sub>**

-----

|    |           |           |           |
|----|-----------|-----------|-----------|
| Ti | -3.275254 | -1.098784 | 0.119546  |
| O  | -1.905235 | 0.876327  | -1.966336 |
| O  | -0.666334 | -0.251233 | 1.784909  |
| O  | -0.265937 | -1.241839 | -0.913075 |
| O  | -2.346090 | 1.856539  | 0.769926  |
| O  | -4.205625 | 0.573499  | 0.924908  |
| O  | -2.073301 | -2.589356 | -0.712600 |
| O  | -2.471866 | -1.603628 | 1.969057  |
| O  | -3.771406 | -0.388284 | -1.760133 |
| C  | -2.988596 | 0.399806  | -2.382598 |
| C  | -1.402942 | -1.066316 | 2.396624  |
| C  | -0.879500 | -2.329370 | -1.060359 |
| C  | -3.540857 | 1.647730  | 1.087612  |
| H  | -3.300922 | 0.683509  | -3.395819 |
| H  | -4.074010 | 2.479909  | 1.564405  |
| H  | -0.325071 | -3.142206 | -1.546778 |
| H  | -1.097989 | -1.345650 | 3.413856  |
| O  | 1.403412  | 0.914600  | 0.029708  |
| O  | 0.135760  | 2.581102  | -0.575721 |

|    |           |           |           |
|----|-----------|-----------|-----------|
| C  | 2.590400  | 0.268055  | 0.528159  |
| C  | 1.349563  | 2.322365  | -0.340602 |
| C  | 3.641680  | 0.297647  | -0.580167 |
| H  | 2.261549  | -0.765001 | 0.672874  |
| C  | 3.037855  | 0.861410  | 1.861655  |
| O  | 2.383304  | 2.974401  | -0.377848 |
| H  | 3.220154  | -0.032699 | -1.528040 |
| H  | 4.133551  | 1.261202  | -0.678920 |
| Br | 5.144264  | -1.036675 | -0.203857 |
| H  | 3.353471  | 1.901223  | 1.737912  |
| H  | 2.203116  | 0.822827  | 2.569083  |
| H  | 3.871067  | 0.280142  | 2.272172  |
| Ti | -0.855347 | 0.649484  | -0.137276 |

-----

**Ti-TS<sub>3</sub>**

-----

|    |           |           |           |
|----|-----------|-----------|-----------|
| Ti | -3.788084 | 0.852994  | 0.208123  |
| O  | -0.971040 | 1.017432  | -1.180021 |
| O  | -2.674433 | -1.998102 | 1.007024  |
| O  | -2.567730 | -1.312503 | -1.736921 |
| O  | -1.097138 | 0.281459  | 1.728971  |
| O  | -2.914631 | 1.613639  | 1.921230  |
| O  | -4.454558 | -0.086003 | -1.533205 |
| O  | -4.563570 | -0.782768 | 1.253088  |
| O  | -2.799213 | 2.314004  | -0.866485 |
| C  | -1.640054 | 2.070357  | -1.330087 |
| C  | -3.839777 | -1.803702 | 1.452634  |
| C  | -3.696835 | -0.909041 | -2.130110 |
| C  | -1.790102 | 1.159381  | 2.303893  |
| H  | -1.182892 | 2.861245  | -1.932491 |
| H  | -1.390248 | 1.570247  | 3.236577  |
| H  | -4.052312 | -1.303147 | -3.087938 |
| H  | -4.259598 | -2.594454 | 2.081435  |
| O  | 0.459696  | -1.321814 | -0.270860 |
| C  | 1.682922  | -1.020575 | -0.334232 |
| O  | 2.066831  | 0.155769  | 0.207572  |
| O  | 2.595902  | -1.732643 | -0.844007 |
| C  | 3.460067  | 0.478867  | -0.080832 |
| C  | 4.238693  | -0.814690 | -0.260412 |
| H  | 3.805624  | 0.994558  | 0.813850  |
| C  | 3.521944  | 1.395778  | -1.296820 |

|    |           |           |           |
|----|-----------|-----------|-----------|
| H  | 4.347203  | -1.501692 | 0.563345  |
| H  | 4.703897  | -1.067732 | -1.197596 |
| Br | 6.505536  | 0.119660  | 0.398630  |
| H  | 3.153941  | 0.878293  | -2.190443 |
| H  | 2.899473  | 2.280237  | -1.128368 |
| H  | 4.557031  | 1.709102  | -1.463282 |
| Ti | -1.509097 | -0.695757 | -0.075507 |

-----

**Ti-Int<sub>4</sub>**

-----

|    |           |           |           |
|----|-----------|-----------|-----------|
| Ti | -4.270998 | 0.471642  | 0.319930  |
| O  | -1.346510 | 1.680330  | -0.720663 |
| O  | -2.296859 | -2.216461 | 0.500119  |
| O  | -2.311118 | -0.770482 | -2.076170 |
| O  | -1.341911 | 0.232516  | 1.869877  |
| O  | -3.491646 | 0.851682  | 2.143679  |
| O  | -4.413640 | -0.101529 | -1.615869 |
| O  | -4.398589 | -1.477672 | 0.844246  |
| O  | -3.496714 | 2.223872  | -0.316180 |
| C  | -2.306643 | 2.489797  | -0.698413 |
| C  | -3.491662 | -2.376281 | 0.858357  |
| C  | -3.508886 | -0.555189 | -2.393805 |
| C  | -2.296765 | 0.669903  | 2.558840  |
| H  | -2.123662 | 3.518409  | -1.040483 |
| H  | -2.102953 | 0.915376  | 3.612766  |
| H  | -3.813130 | -0.765159 | -3.429503 |
| H  | -3.792289 | -3.368561 | 1.223959  |
| O  | 0.518077  | -0.833219 | -0.442836 |
| C  | 1.723477  | -0.593289 | -0.382177 |
| O  | 2.236048  | 0.460536  | 0.230208  |
| O  | 2.634860  | -1.381523 | -0.935461 |
| C  | 3.702568  | 0.512742  | -0.017976 |
| C  | 3.979149  | -0.897474 | -0.559401 |
| H  | 4.180763  | 0.669307  | 0.946154  |
| C  | 4.000541  | 1.646715  | -0.978923 |
| H  | 4.388781  | -1.574276 | 0.188620  |
| H  | 4.600690  | -0.914589 | -1.451011 |
| Br | 6.990815  | -0.040012 | 0.395672  |
| H  | 3.533801  | 1.472154  | -1.957091 |
| H  | 3.631411  | 2.596897  | -0.577677 |
| H  | 5.087976  | 1.699679  | -1.092136 |
| Ti | -1.520665 | -0.361404 | -0.158053 |

-----  
**W-HKUST-1**

**W-HKUST-1**  
-----

|   |           |           |           |
|---|-----------|-----------|-----------|
| W | 1.093228  | 0.055361  | -0.054800 |
| W | -1.093068 | -0.057296 | 0.053549  |
| O | 1.154981  | -1.710922 | -1.175103 |
| O | 1.086944  | 1.823344  | 1.064503  |
| O | 1.265935  | -1.058866 | 1.708047  |
| O | 0.974101  | 1.171477  | -1.820947 |
| O | -1.267012 | 1.064081  | -1.704278 |
| O | -0.975393 | -1.164692 | 1.825155  |
| O | -1.154418 | 1.710454  | 1.172836  |
| O | -1.086110 | -1.825600 | -1.064436 |
| C | 0.044769  | -2.283446 | -1.445488 |
| C | -0.044045 | 2.281708  | 1.444532  |
| C | 0.187498  | -1.434160 | 2.282037  |
| C | -0.188845 | 1.444660  | -2.275316 |
| H | 0.063194  | -3.206751 | -2.029085 |
| H | -0.264320 | 2.030487  | -3.194295 |
| H | 0.262767  | -2.011805 | 3.206205  |
| H | -0.062013 | 3.204517  | 2.029000  |

-----  
**W-Int<sub>0</sub>**  
-----

|   |           |           |           |
|---|-----------|-----------|-----------|
| W | -1.618528 | -0.083914 | 0.243989  |
| W | 0.529485  | 0.056920  | -0.247896 |
| O | -1.793644 | -1.815392 | -0.913228 |
| O | -1.491351 | 1.648151  | 1.417058  |
| O | -2.100375 | 1.080694  | -1.422709 |
| O | -1.183413 | -1.253056 | 1.928630  |
| O | 1.008418  | -1.110376 | 1.439366  |
| O | 0.087074  | 1.228594  | -1.926907 |
| O | 0.700133  | 1.797308  | 0.927907  |
| O | 0.395558  | -1.677706 | -1.413803 |
| C | -0.743525 | -2.248796 | -1.500141 |
| C | -0.355616 | 2.223605  | 1.510193  |
| C | -1.140417 | 1.493243  | -2.159665 |
| C | 0.041702  | -1.519709 | 2.169262  |
| H | -0.824873 | -3.153975 | -2.106007 |
| H | 0.276925  | -2.129447 | 3.044994  |

|   |           |           |           |
|---|-----------|-----------|-----------|
| H | -1.383914 | 2.103370  | -3.032292 |
| H | -0.282677 | 3.127529  | 2.119771  |
| O | 3.060387  | 0.283135  | -0.534141 |
| C | 4.042910  | -0.130799 | 0.456732  |
| C | 5.187162  | -0.960416 | -0.062512 |
| C | 3.872596  | 1.290746  | 0.119690  |
| H | 3.572081  | -0.482223 | 1.374403  |
| H | 5.997115  | -0.987746 | 0.677304  |
| H | 4.861673  | -1.990455 | -0.247330 |
| H | 5.579853  | -0.547627 | -0.997522 |
| H | 4.586848  | 1.772286  | -0.546605 |
| H | 3.315052  | 1.947795  | 0.783625  |

-----

### W-Int<sub>1</sub>

|    |           |           |           |
|----|-----------|-----------|-----------|
| W  | 2.360171  | -0.368002 | 0.268052  |
| W  | 0.293551  | 0.266224  | -0.240206 |
| O  | 3.051624  | 1.595819  | 0.034605  |
| O  | 1.724091  | -2.350291 | 0.514213  |
| O  | 2.768732  | -0.750235 | -1.749976 |
| O  | 2.005618  | 0.000793  | 2.301822  |
| O  | -0.092730 | 0.644707  | 1.795079  |
| O  | 0.673069  | -0.108986 | -2.274431 |
| O  | -0.373840 | -1.714205 | 0.000050  |
| O  | 0.956706  | 2.249199  | -0.479610 |
| C  | 2.193495  | 2.489132  | -0.291348 |
| C  | 0.481784  | -2.598864 | 0.326223  |
| C  | 1.829198  | -0.537500 | -2.594248 |
| C  | 0.845253  | 0.430897  | 2.629993  |
| H  | 2.545625  | 3.516841  | -0.415011 |
| H  | 0.648814  | 0.624604  | 3.687851  |
| H  | 2.033483  | -0.735718 | -3.649775 |
| H  | 0.137172  | -3.628250 | 0.454202  |
| O  | -1.978718 | 0.840420  | -0.671603 |
| C  | -3.112740 | 0.972154  | 0.274331  |
| C  | -3.876770 | 2.263070  | 0.216865  |
| C  | -3.193149 | -0.021453 | -0.780819 |
| H  | -2.853596 | 0.611653  | 1.268157  |
| H  | -4.871663 | 2.078656  | 0.637986  |
| H  | -3.366018 | 3.052790  | 0.783051  |
| H  | -4.001899 | 2.591045  | -0.820618 |
| Br | -6.306345 | -0.598426 | 0.107432  |



|   |           |           |           |
|---|-----------|-----------|-----------|
| H | -3.788976 | 0.188760  | -1.661711 |
| H | -3.015077 | -1.066262 | -0.551996 |

-----  
**W-TS<sub>1</sub>**  
-----

|    |           |           |           |
|----|-----------|-----------|-----------|
| W  | 2.287190  | -0.422982 | 0.261391  |
| W  | 0.242267  | 0.310090  | -0.243298 |
| O  | 3.092868  | 1.475282  | -0.110082 |
| O  | 1.538919  | -2.344275 | 0.648349  |
| O  | 2.619670  | -0.953835 | -1.736234 |
| O  | 2.009267  | 0.091484  | 2.276751  |
| O  | -0.060715 | 0.833777  | 1.779673  |
| O  | 0.553653  | -0.215102 | -2.258401 |
| O  | -0.531714 | -1.613755 | 0.140417  |
| O  | 1.028897  | 2.229142  | -0.621123 |
| C  | 2.281835  | 2.398450  | -0.473149 |
| C  | 0.279211  | -2.524957 | 0.502545  |
| C  | 1.673240  | -0.733749 | -2.571738 |
| C  | 0.885556  | 0.611916  | 2.601863  |
| H  | 2.693322  | 3.392710  | -0.666311 |
| H  | 0.730568  | 0.880608  | 3.650325  |
| H  | 1.840370  | -1.009584 | -3.616315 |
| H  | -0.121875 | -3.521943 | 0.701441  |
| O  | -1.906273 | 0.983021  | -0.644162 |
| C  | -3.002308 | 1.121733  | 0.274536  |
| C  | -3.701853 | 2.461241  | 0.242989  |
| C  | -3.398177 | 0.062317  | -0.640274 |
| H  | -2.751133 | 0.793565  | 1.287491  |
| H  | -4.649487 | 2.389946  | 0.788287  |
| H  | -3.070433 | 3.230540  | 0.705275  |
| H  | -3.915329 | 2.757556  | -0.790289 |
| Br | -5.937696 | -0.690862 | 0.091482  |
| H  | -3.862627 | 0.312451  | -1.580934 |
| H  | -3.115405 | -0.959248 | -0.441874 |

-----  
**W-Int<sub>2</sub>**  
-----

|   |          |           |           |
|---|----------|-----------|-----------|
| W | 2.224886 | -0.479043 | 0.230633  |
| W | 0.197012 | 0.386401  | -0.217004 |
| O | 3.076458 | 1.436052  | 0.235111  |
| O | 1.433083 | -2.426940 | 0.242051  |

|    |           |           |           |
|----|-----------|-----------|-----------|
| O  | 2.634985  | -0.656781 | -1.816315 |
| O  | 1.872458  | -0.325407 | 2.296049  |
| O  | -0.170384 | 0.537797  | 1.866949  |
| O  | 0.601388  | 0.211636  | -2.283146 |
| O  | -0.611769 | -1.577465 | -0.205132 |
| O  | 1.045943  | 2.320305  | -0.215917 |
| C  | 2.292828  | 2.425361  | 0.009037  |
| C  | 0.177939  | -2.548082 | 0.019821  |
| C  | 1.725254  | -0.269679 | -2.633072 |
| C  | 0.742342  | 0.152710  | 2.663450  |
| H  | 2.729139  | 3.427215  | 0.013011  |
| H  | 0.554200  | 0.234399  | 3.737522  |
| H  | 1.932593  | -0.363876 | -3.702280 |
| H  | -0.241887 | -3.557154 | 0.023306  |
| O  | -1.783588 | 1.147274  | -0.555435 |
| C  | -2.967794 | 0.964997  | 0.147726  |
| C  | -3.717935 | 2.292299  | 0.319776  |
| C  | -3.724443 | -0.056125 | -0.702203 |
| H  | -2.794361 | 0.527542  | 1.148603  |
| H  | -4.663515 | 2.164809  | 0.862022  |
| H  | -3.080703 | 2.991206  | 0.873817  |
| H  | -3.927414 | 2.733438  | -0.663984 |
| Br | -5.557531 | -0.678847 | 0.105935  |
| H  | -4.002760 | 0.343623  | -1.677131 |
| H  | -3.169840 | -0.986697 | -0.792111 |

-----

### W-Int<sub>3</sub>

-----

|   |           |           |           |
|---|-----------|-----------|-----------|
| W | -2.385349 | -0.547400 | -0.184784 |
| O | -2.791824 | 1.128356  | -1.375688 |
| O | -2.031994 | -2.243924 | 0.997395  |
| O | -3.065704 | 0.491143  | 1.505280  |
| O | -1.770073 | -1.609453 | -1.891620 |
| O | 0.345791  | -0.898940 | -1.545131 |
| O | -0.960011 | 1.220339  | 1.877268  |
| O | 0.080309  | -1.533674 | 1.361517  |
| O | -0.686969 | 1.870660  | -1.028927 |
| C | -1.847575 | 1.978607  | -1.539955 |
| C | -0.867452 | -2.368773 | 1.516144  |
| C | -2.194040 | 1.153539  | 2.172993  |
| C | -0.528379 | -1.550643 | -2.199274 |
| H | -2.057337 | 2.852088  | -2.162743 |

|    |           |           |           |
|----|-----------|-----------|-----------|
| H  | -0.199198 | -2.096553 | -3.087236 |
| H  | -2.536722 | 1.697135  | 3.057075  |
| H  | -0.679009 | -3.252436 | 2.131844  |
| O  | 1.747467  | 0.864056  | 0.462170  |
| O  | 1.353891  | 3.952607  | 0.449836  |
| C  | 2.879266  | 0.151245  | 0.853188  |
| C  | 1.870004  | 3.512923  | -0.503577 |
| C  | 3.589587  | -0.163674 | -0.464623 |
| H  | 2.611950  | -0.803665 | 1.340900  |
| C  | 3.737509  | 0.967836  | 1.828317  |
| O  | 2.414196  | 3.190804  | -1.490135 |
| H  | 2.955412  | -0.742407 | -1.131493 |
| H  | 3.971374  | 0.730335  | -0.956578 |
| Br | 5.285380  | -1.368729 | -0.257016 |
| H  | 4.067781  | 1.902104  | 1.354073  |
| H  | 3.131514  | 1.229459  | 2.703168  |
| H  | 4.623311  | 0.411684  | 2.159936  |
| W  | -0.287510 | 0.174908  | 0.171697  |

-----

**W-TS<sub>2</sub>**

-----

|   |           |           |           |
|---|-----------|-----------|-----------|
| W | -2.315539 | -0.690146 | -0.051932 |
| O | -2.738027 | 0.163470  | -1.913186 |
| O | -1.963163 | -1.587451 | 1.812524  |
| O | -3.283699 | 0.899383  | 0.899485  |
| O | -1.417854 | -2.329471 | -1.011490 |
| O | 0.565052  | -1.259578 | -0.923883 |
| O | -1.312754 | 1.989519  | 1.017981  |
| O | 0.016462  | -0.512590 | 1.927215  |
| O | -0.759887 | 1.244196  | -1.835734 |
| C | -1.857372 | 0.955381  | -2.406923 |
| C | -0.861730 | -1.301061 | 2.400449  |
| C | -2.561675 | 1.907303  | 1.231702  |
| C | -0.159798 | -2.255525 | -1.238849 |
| H | -2.070604 | 1.409609  | -3.378032 |
| H | 0.320134  | -3.104409 | -1.733515 |
| H | -3.056213 | 2.747225  | 1.725851  |
| H | -0.665726 | -1.767999 | 3.370123  |
| O | 1.800652  | 1.180146  | 0.207066  |
| O | 1.078799  | 3.432327  | -0.437258 |
| C | 2.852590  | 0.339894  | 0.656149  |
| C | 2.167039  | 2.943970  | -0.374806 |

|    |           |           |           |
|----|-----------|-----------|-----------|
| C  | 3.701736  | 0.015135  | -0.574261 |
| H  | 2.403358  | -0.599190 | 1.006981  |
| C  | 3.628489  | 0.955709  | 1.825924  |
| O  | 3.357226  | 3.045548  | -0.514048 |
| H  | 3.085361  | -0.403725 | -1.366119 |
| H  | 4.297095  | 0.855838  | -0.920611 |
| Br | 5.089946  | -1.474018 | -0.212261 |
| H  | 4.134708  | 1.876992  | 1.522827  |
| H  | 2.922737  | 1.191248  | 2.630740  |
| H  | 4.374787  | 0.251069  | 2.212474  |
| W  | -0.361379 | 0.388053  | 0.043996  |

-----

#### W-Int<sub>4</sub>

-----

|    |           |           |           |
|----|-----------|-----------|-----------|
| W  | -2.700037 | -0.629921 | 0.160302  |
| O  | -2.135804 | -1.146699 | 2.111667  |
| O  | -3.330791 | -0.150873 | -1.780212 |
| O  | -1.879146 | -2.422096 | -0.550342 |
| O  | -3.588443 | 1.126446  | 0.883034  |
| O  | -1.637867 | 2.214799  | 0.563246  |
| O  | 0.082004  | -1.359775 | -0.889772 |
| O  | -1.378979 | 0.928315  | -2.122998 |
| O  | -0.177817 | -0.069101 | 1.802828  |
| C  | -0.984462 | -0.748261 | 2.511619  |
| C  | -2.523466 | 0.531423  | -2.506413 |
| C  | -0.652745 | -2.395661 | -0.924314 |
| C  | -2.854637 | 2.177347  | 0.926665  |
| H  | -0.679417 | -1.013776 | 3.527813  |
| H  | -3.309005 | 3.099632  | 1.300377  |
| H  | -0.214581 | -3.327397 | -1.293104 |
| H  | -2.845319 | 0.786479  | -3.520334 |
| O  | 1.131127  | 1.627978  | -0.550426 |
| C  | 2.381767  | 1.539318  | -0.354838 |
| O  | 2.734918  | 0.308838  | 0.230563  |
| O  | 3.268902  | 2.359230  | -0.619575 |
| C  | 4.089846  | 0.091901  | 0.646065  |
| C  | 5.038181  | 0.207746  | -0.550493 |
| H  | 4.075289  | -0.956655 | 0.961991  |
| C  | 4.483810  | 0.967245  | 1.837220  |
| H  | 4.618577  | -0.258211 | -1.440220 |
| H  | 5.376886  | 1.217557  | -0.754472 |
| Br | 6.767437  | -0.859488 | -0.204363 |

|   |           |          |           |
|---|-----------|----------|-----------|
| H | 4.491692  | 2.022583 | 1.551536  |
| H | 3.760467  | 0.825926 | 2.647974  |
| H | 5.478028  | 0.684813 | 2.203585  |
| W | -0.761956 | 0.433142 | -0.162594 |

-----

**W-TS<sub>3</sub>**

-----

|    |           |           |           |
|----|-----------|-----------|-----------|
| W  | -2.822431 | -0.523851 | -0.073284 |
| O  | -2.259082 | -1.955692 | 1.348874  |
| O  | -3.451605 | 0.879706  | -1.496354 |
| O  | -2.215103 | -1.809978 | -1.611883 |
| O  | -3.495742 | 0.732467  | 1.463583  |
| O  | -1.451347 | 1.679944  | 1.551215  |
| O  | -0.165293 | -0.874373 | -1.548210 |
| O  | -1.406574 | 1.827323  | -1.430540 |
| O  | -0.208256 | -1.023450 | 1.437268  |
| C  | -1.060764 | -1.894746 | 1.799678  |
| C  | -2.598181 | 1.760452  | -1.869627 |
| C  | -1.004207 | -1.704870 | -2.020009 |
| C  | -2.654769 | 1.570332  | 1.947132  |
| H  | -0.755615 | -2.640580 | 2.539085  |
| H  | -2.997491 | 2.230370  | 2.749261  |
| H  | -0.674715 | -2.372245 | -2.821102 |
| H  | -2.917678 | 2.499103  | -2.610435 |
| O  | 1.267887  | 1.475423  | 0.092681  |
| C  | 2.480666  | 1.178052  | 0.181115  |
| O  | 2.814067  | -0.143750 | 0.055188  |
| O  | 3.451598  | 1.972905  | 0.361790  |
| C  | 4.203054  | -0.414082 | 0.371288  |
| C  | 5.052208  | 0.789047  | -0.007016 |
| H  | 4.463172  | -1.257562 | -0.267766 |
| C  | 4.333612  | -0.796003 | 1.842966  |
| H  | 5.059790  | 1.144412  | -1.024880 |
| H  | 5.583198  | 1.361394  | 0.733928  |
| Br | 7.188582  | -0.410060 | -0.453511 |
| H  | 4.056924  | 0.047955  | 2.485538  |
| H  | 3.669372  | -1.636469 | 2.068994  |
| H  | 5.367281  | -1.085938 | 2.057535  |
| W  | -0.799309 | 0.402884  | 0.001671  |

-----

**W-Int<sub>5</sub>**

---

|    |           |           |           |
|----|-----------|-----------|-----------|
| W  | -2.918844 | -0.494541 | -0.091785 |
| O  | -2.376037 | -2.020427 | 1.236785  |
| O  | -3.521972 | 1.007120  | -1.422226 |
| O  | -2.346993 | -1.696492 | -1.709065 |
| O  | -3.551326 | 0.682886  | 1.522191  |
| O  | -1.486556 | 1.575117  | 1.648363  |
| O  | -0.279626 | -0.811174 | -1.600067 |
| O  | -1.457296 | 1.901154  | -1.311710 |
| O  | -0.308122 | -1.137889 | 1.362168  |
| C  | -1.174735 | -2.013946 | 1.681641  |
| C  | -2.653207 | 1.890106  | -1.748546 |
| C  | -1.137368 | -1.595119 | -2.119301 |
| C  | -2.690419 | 1.471213  | 2.049617  |
| H  | -0.878800 | -2.807390 | 2.373235  |
| H  | -3.010609 | 2.089732  | 2.892771  |
| H  | -0.825727 | -2.218498 | -2.961607 |
| H  | -2.958612 | 2.679016  | -2.441549 |
| O  | 1.333565  | 1.385791  | 0.167035  |
| C  | 2.503576  | 1.016484  | 0.182523  |
| O  | 2.896256  | -0.237227 | -0.008830 |
| O  | 3.519368  | 1.850445  | 0.397284  |
| C  | 4.357306  | -0.345947 | 0.223791  |
| C  | 4.788177  | 1.127598  | 0.203316  |
| H  | 4.774830  | -0.893236 | -0.618427 |
| C  | 4.601242  | -1.073322 | 1.532023  |
| H  | 5.218613  | 1.436021  | -0.748452 |
| H  | 5.459072  | 1.401494  | 1.013948  |
| Br | 7.677719  | -0.347708 | -0.407909 |
| H  | 4.201051  | -0.506392 | 2.382782  |
| H  | 4.128385  | -2.061527 | 1.515360  |
| H  | 5.683843  | -1.191988 | 1.642510  |
| W  | -0.884531 | 0.378132  | 0.023413  |

---

**Mo-HKUST-1****Mo-HKUST-1**

---

|    |           |           |          |
|----|-----------|-----------|----------|
| Mo | -0.000416 | -0.000089 | 1.060859 |
|----|-----------|-----------|----------|

|    |           |           |           |
|----|-----------|-----------|-----------|
| Mo | 0.000060  | 0.000007  | -1.060839 |
| O  | 1.492004  | -1.510356 | 1.120310  |
| O  | -1.492951 | 1.510141  | 1.119728  |
| O  | -1.510942 | -1.492617 | 1.119079  |
| O  | 1.509962  | 1.492507  | 1.119943  |
| O  | 1.510992  | 1.491847  | -1.119606 |
| O  | -1.509858 | -1.492701 | -1.120467 |
| O  | -1.491661 | 1.511201  | -1.119817 |
| O  | 1.493282  | -1.509825 | -1.119237 |
| C  | 1.917148  | -1.939213 | 0.000627  |
| C  | -1.916432 | 1.940177  | -0.000108 |
| C  | -1.939645 | -1.917052 | -0.000824 |
| C  | 1.939952  | 1.916321  | 0.000267  |
| H  | 2.687300  | -2.717710 | 0.000935  |
| H  | 2.719120  | 2.685796  | 0.000371  |
| H  | -2.718358 | -2.686984 | -0.001237 |
| H  | -2.685867 | 2.719382  | -0.000160 |

-----  
**Mo-Int<sub>0</sub>**  
 -----

|    |           |           |           |
|----|-----------|-----------|-----------|
| Mo | 1.733362  | 0.087480  | 0.311538  |
| O  | -0.909666 | 1.086033  | 1.462697  |
| O  | 0.183815  | -1.168055 | -1.991283 |
| O  | -0.559993 | -1.848782 | 0.857325  |
| O  | -0.165928 | 1.760953  | -1.383490 |
| O  | 1.989943  | 1.886887  | -0.783091 |
| O  | 1.598916  | -1.707764 | 1.445228  |
| O  | 2.337762  | -1.031296 | -1.386821 |
| O  | 1.250279  | 1.215425  | 2.049558  |
| C  | 0.019819  | 1.468662  | 2.241484  |
| C  | 1.416028  | -1.417654 | -2.174528 |
| C  | 0.467171  | -2.285194 | 1.466997  |
| C  | 0.968488  | 2.333029  | -1.397060 |
| H  | -0.254683 | 2.048972  | 3.127825  |
| H  | 1.073368  | 3.260452  | -1.967512 |
| H  | 0.371813  | -3.210321 | 2.043840  |
| H  | 1.701298  | -1.996756 | -3.057660 |
| Mo | -0.318290 | -0.037923 | -0.262032 |
| O  | -2.863244 | -0.277968 | -0.661620 |
| C  | -3.884512 | 0.067189  | 0.312277  |
| C  | -5.019075 | 0.916514  | -0.197509 |
| C  | -3.687349 | -1.329885 | -0.103712 |
| H  | -3.453706 | 0.366146  | 1.267609  |
| H  | -5.855785 | 0.892580  | 0.512096  |

|   |           |           |           |
|---|-----------|-----------|-----------|
| H | -4.698504 | 1.958684  | -0.308954 |
| H | -5.373028 | 0.557189  | -1.169410 |
| H | -4.373146 | -1.775631 | -0.823080 |
| H | -3.149149 | -2.022134 | 0.540260  |

-----

**Mo-Int<sub>1</sub>**

-----

|    |           |           |           |
|----|-----------|-----------|-----------|
| Mo | 2.652099  | -0.401935 | 0.340545  |
| O  | 0.216931  | 0.724898  | 1.776505  |
| O  | 1.114772  | -0.251416 | -2.289727 |
| O  | -0.054369 | -1.754684 | 0.056480  |
| O  | 1.387730  | 2.221484  | -0.572449 |
| O  | 3.440080  | 1.553730  | 0.045786  |
| O  | 2.003289  | -2.398185 | 0.675204  |
| O  | 3.167900  | -0.905697 | -1.660994 |
| O  | 2.274032  | 0.063400  | 2.381374  |
| C  | 1.117925  | 0.530558  | 2.645096  |
| C  | 2.266731  | -0.714028 | -2.541731 |
| C  | 0.768896  | -2.630170 | 0.454367  |
| C  | 2.615482  | 2.440861  | -0.350450 |
| H  | 0.891883  | 0.777523  | 3.687154  |
| H  | 2.994689  | 3.455751  | -0.507983 |
| H  | 0.399998  | -3.647051 | 0.619764  |
| H  | 2.505324  | -0.964988 | -3.580203 |
| Mo | 0.688440  | 0.226132  | -0.251444 |
| O  | -1.601962 | 0.801543  | -0.770718 |
| C  | -2.748348 | 1.035629  | 0.133418  |
| C  | -3.502258 | 2.319678  | -0.061447 |
| C  | -2.817876 | -0.052376 | -0.825492 |
| H  | -2.514878 | 0.768791  | 1.162663  |
| H  | -4.506849 | 2.181336  | 0.354429  |
| H  | -2.997744 | 3.157512  | 0.437647  |
| H  | -3.603491 | 2.548959  | -1.127810 |
| Br | -5.977251 | -0.512028 | 0.102440  |
| H  | -3.398952 | 0.078656  | -1.731837 |
| H  | -2.659373 | -1.073314 | -0.495746 |

-----

**Mo-TS<sub>1</sub>**

-----

|    |          |           |          |
|----|----------|-----------|----------|
| Mo | 2.547615 | -0.466558 | 0.341908 |
|----|----------|-----------|----------|



|    |           |           |           |
|----|-----------|-----------|-----------|
| O  | 0.241701  | 0.950059  | 1.737254  |
| O  | 0.963319  | -0.402758 | -2.268532 |
| O  | -0.257213 | -1.634607 | 0.217044  |
| O  | 1.465338  | 2.170741  | -0.754910 |
| O  | 3.475696  | 1.393250  | -0.119633 |
| O  | 1.765154  | -2.378281 | 0.847409  |
| O  | 2.976844  | -1.161403 | -1.622304 |
| O  | 2.261250  | 0.180235  | 2.348509  |
| C  | 1.149607  | 0.752934  | 2.595921  |
| C  | 2.071283  | -0.969741 | -2.499138 |
| C  | 0.511810  | -2.531851 | 0.667625  |
| C  | 2.709935  | 2.307238  | -0.570487 |
| H  | 0.971928  | 1.094969  | 3.620235  |
| H  | 3.161517  | 3.274365  | -0.812574 |
| H  | 0.075732  | -3.502603 | 0.920820  |
| H  | 2.267996  | -1.319958 | -3.517154 |
| Mo | 0.613721  | 0.265785  | -0.267155 |
| O  | -1.530576 | 0.965072  | -0.739815 |
| C  | -2.639369 | 1.200762  | 0.130570  |
| C  | -3.321082 | 2.540857  | -0.041235 |
| C  | -3.057897 | 0.060056  | -0.672431 |
| H  | -2.415740 | 0.972905  | 1.177998  |
| H  | -4.275336 | 2.539846  | 0.497395  |
| H  | -2.681859 | 3.343054  | 0.349188  |
| H  | -3.518298 | 2.736542  | -1.101567 |
| Br | -5.586632 | -0.594657 | 0.083596  |
| H  | -3.489067 | 0.225117  | -1.647219 |
| H  | -2.778695 | -0.938757 | -0.377744 |

-----

### Mo-Int<sub>2</sub>

-----

|    |           |           |           |
|----|-----------|-----------|-----------|
| Mo | 2.466216  | -0.515442 | 0.345801  |
| O  | 0.121649  | 0.784106  | 1.795083  |
| O  | 1.020298  | -0.115409 | -2.325503 |
| O  | -0.350873 | -1.614136 | -0.043221 |
| O  | 1.491273  | 2.260206  | -0.498447 |
| O  | 3.451828  | 1.361547  | 0.146308  |
| O  | 1.634720  | -2.461349 | 0.592869  |
| O  | 2.983244  | -0.994928 | -1.662793 |
| O  | 2.099946  | -0.100445 | 2.401386  |
| C  | 0.986391  | 0.466244  | 2.657807  |
| C  | 2.127504  | -0.681356 | -2.554801 |

|    |           |           |           |
|----|-----------|-----------|-----------|
| C  | 0.389861  | -2.563438 | 0.337318  |
| C  | 2.725155  | 2.337519  | -0.235720 |
| H  | 0.769887  | 0.691411  | 3.706257  |
| H  | 3.206928  | 3.313242  | -0.341050 |
| H  | -0.066795 | -3.549429 | 0.459270  |
| H  | 2.373220  | -0.923842 | -3.592667 |
| Mo | 0.563025  | 0.338719  | -0.278155 |
| O  | -1.415542 | 1.081683  | -0.696042 |
| C  | -2.614442 | 1.026618  | -0.003240 |
| C  | -3.330817 | 2.384272  | -0.016812 |
| C  | -3.385174 | -0.075100 | -0.731263 |
| H  | -2.471439 | 0.717325  | 1.049431  |
| H  | -4.287634 | 2.351881  | 0.520029  |
| H  | -2.682430 | 3.131892  | 0.454687  |
| H  | -3.513351 | 2.700549  | -1.052737 |
| Br | -5.249895 | -0.547739 | 0.114404  |
| H  | -3.638971 | 0.204113  | -1.753750 |
| H  | -2.854422 | -1.022703 | -0.691600 |

-----

**Mo-Int<sub>3</sub>**

-----

|    |           |           |           |
|----|-----------|-----------|-----------|
| Mo | -2.619338 | -0.710638 | -0.216568 |
| O  | -1.414667 | 1.165521  | 1.872004  |
| O  | 0.108043  | -0.943483 | -1.560607 |
| O  | -1.118908 | 1.814601  | -1.082317 |
| O  | -0.183218 | -1.572890 | 1.404853  |
| O  | -2.229795 | -2.412876 | 0.999221  |
| O  | -3.152700 | 0.931625  | -1.461202 |
| O  | -1.945738 | -1.783590 | -1.930706 |
| O  | -3.450193 | 0.298532  | 1.464007  |
| C  | -2.640941 | 1.018885  | 2.137744  |
| C  | -0.709876 | -1.650405 | -2.214021 |
| C  | -2.267113 | 1.835452  | -1.613250 |
| C  | -1.077080 | -2.455868 | 1.542255  |
| H  | -3.039126 | 1.546430  | 3.009031  |
| H  | -0.850691 | -3.322079 | 2.171126  |
| H  | -2.523396 | 2.686781  | -2.250376 |
| H  | -0.332215 | -2.187796 | -3.088677 |
| O  | 1.375962  | 0.868090  | 0.490972  |
| O  | 0.821121  | 3.909716  | 0.513808  |
| C  | 2.533970  | 0.205488  | 0.881551  |
| C  | 1.390973  | 3.512414  | -0.427612 |

|    |           |           |           |
|----|-----------|-----------|-----------|
| C  | 3.264656  | -0.064534 | -0.435288 |
| H  | 2.306467  | -0.765825 | 1.358097  |
| C  | 3.353487  | 1.046263  | 1.870839  |
| O  | 1.982140  | 3.239464  | -1.402131 |
| H  | 2.658584  | -0.661136 | -1.112101 |
| H  | 3.614099  | 0.849311  | -0.914625 |
| Br | 5.009838  | -1.204143 | -0.232777 |
| H  | 3.648608  | 1.998171  | 1.408316  |
| H  | 2.731986  | 1.273859  | 2.744450  |
| H  | 4.259241  | 0.522983  | 2.202610  |
| Mo | -0.648347 | 0.124934  | 0.161873  |

-----

### Mo-TS<sub>2</sub>

-----

|    |           |           |           |
|----|-----------|-----------|-----------|
| Mo | -2.551213 | -0.832470 | -0.062604 |
| O  | -1.767584 | 1.899208  | 1.027304  |
| O  | 0.317055  | -1.302371 | -0.949966 |
| O  | -1.155978 | 1.181124  | -1.871470 |
| O  | -0.294369 | -0.573455 | 1.960652  |
| O  | -2.201470 | -1.754104 | 1.822756  |
| O  | -3.059029 | -0.010316 | -1.953670 |
| O  | -1.599970 | -2.470533 | -1.034241 |
| O  | -3.663273 | 0.700293  | 0.898534  |
| C  | -3.003385 | 1.740851  | 1.233012  |
| C  | -0.352981 | -2.327605 | -1.258915 |
| C  | -2.228299 | 0.828411  | -2.438896 |
| C  | -1.127106 | -1.407206 | 2.415825  |
| H  | -3.547995 | 2.549201  | 1.729232  |
| H  | -0.915196 | -1.868759 | 3.385661  |
| H  | -2.466321 | 1.270254  | -3.411003 |
| H  | 0.169701  | -3.152916 | -1.751937 |
| O  | 1.408822  | 1.176230  | 0.226989  |
| O  | 0.581997  | 3.441927  | -0.405357 |
| C  | 2.487347  | 0.382437  | 0.673521  |
| C  | 1.699862  | 3.037860  | -0.346715 |
| C  | 3.357965  | 0.122433  | -0.557641 |
| H  | 2.089353  | -0.586553 | 1.009069  |
| C  | 3.230029  | 1.017644  | 1.855980  |
| O  | 2.883521  | 3.179165  | -0.463427 |
| H  | 2.769877  | -0.324096 | -1.355603 |
| H  | 3.902603  | 1.001651  | -0.892756 |
| Br | 4.841647  | -1.285930 | -0.218684 |

|    |           |          |          |
|----|-----------|----------|----------|
| H  | 3.689612  | 1.968384 | 1.568209 |
| H  | 2.510242  | 1.206298 | 2.660813 |
| H  | 4.010972  | 0.347472 | 2.236010 |
| Mo | -0.726141 | 0.320335 | 0.037708 |

-----

**Mo-Int<sub>4</sub>**

-----

|    |           |           |           |
|----|-----------|-----------|-----------|
| Mo | -3.077584 | -0.655720 | 0.260490  |
| O  | -0.600794 | 0.137769  | 1.840072  |
| O  | -1.851151 | 0.559411  | -2.249940 |
| O  | -2.126022 | 2.238945  | 0.270937  |
| O  | -0.327608 | -1.544112 | -0.689612 |
| O  | -2.264097 | -2.567992 | -0.188695 |
| O  | -4.046115 | 1.173943  | 0.750715  |
| O  | -3.775376 | -0.484721 | -1.742217 |
| O  | -2.535082 | -0.909559 | 2.300358  |
| C  | -1.393462 | -0.444999 | 2.631819  |
| C  | -2.985055 | 0.096326  | -2.558659 |
| C  | -3.333432 | 2.227042  | 0.641763  |
| C  | -1.045704 | -2.575791 | -0.569401 |
| H  | -1.083880 | -0.564393 | 3.675080  |
| H  | -0.595971 | -3.545716 | -0.804598 |
| H  | -3.805762 | 3.183877  | 0.887695  |
| H  | -3.316831 | 0.198522  | -3.597189 |
| O  | 0.691735  | 1.488520  | -0.756300 |
| C  | 1.942489  | 1.462744  | -0.569970 |
| O  | 2.338149  | 0.338723  | 0.188606  |
| O  | 2.810877  | 2.253082  | -0.963665 |
| C  | 3.701974  | 0.224879  | 0.611668  |
| C  | 4.637034  | 0.195654  | -0.600689 |
| H  | 3.725175  | -0.767059 | 1.075822  |
| C  | 4.080471  | 1.274405  | 1.658837  |
| H  | 4.223187  | -0.400141 | -1.412082 |
| H  | 4.950792  | 1.174056  | -0.947105 |
| Br | 6.397627  | -0.773590 | -0.129028 |
| H  | 4.049348  | 2.277134  | 1.223995  |
| H  | 3.371364  | 1.228833  | 2.492969  |
| H  | 5.087818  | 1.079484  | 2.046162  |
| Mo | -1.223944 | 0.345658  | -0.205229 |

-----

**Mo-TS<sub>3</sub>**

-----

|    |           |           |           |
|----|-----------|-----------|-----------|
| Mo | -3.219084 | -0.552028 | -0.146033 |
| O  | -0.655186 | -1.208320 | 1.353966  |
| O  | -1.882370 | 1.931160  | -1.297754 |
| O  | -1.948926 | 1.505259  | 1.707072  |
| O  | -0.590146 | -0.781470 | -1.656381 |
| O  | -2.621941 | -1.723695 | -1.815674 |
| O  | -3.971595 | 0.548358  | 1.512395  |
| O  | -3.905367 | 0.969934  | -1.463971 |
| O  | -2.686777 | -2.144667 | 1.157914  |
| C  | -1.498675 | -2.111021 | 1.621494  |
| C  | -3.063178 | 1.885298  | -1.747243 |
| C  | -3.147936 | 1.344151  | 2.074280  |
| C  | -1.414736 | -1.569949 | -2.200085 |
| H  | -1.192815 | -2.919486 | 2.293301  |
| H  | -1.074391 | -2.162540 | -3.055238 |
| H  | -3.507205 | 1.924590  | 2.930646  |
| H  | -3.388252 | 2.681961  | -2.424521 |
| O  | 0.817903  | 1.424336  | 0.224257  |
| C  | 2.035878  | 1.156716  | 0.291499  |
| O  | 2.404423  | -0.147715 | 0.066170  |
| O  | 2.990738  | 1.956515  | 0.531879  |
| C  | 3.796659  | -0.408370 | 0.364775  |
| C  | 4.625262  | 0.829547  | 0.060192  |
| H  | 4.072550  | -1.206958 | -0.323860 |
| C  | 3.940635  | -0.876919 | 1.810519  |
| H  | 4.604775  | 1.259493  | -0.928357 |
| H  | 5.142873  | 1.367665  | 0.835505  |
| Br | 6.770949  | -0.280124 | -0.483820 |
| H  | 3.647853  | -0.079734 | 2.503606  |
| H  | 3.295173  | -1.743822 | 1.985969  |
| H  | 4.980814  | -1.157567 | 2.006057  |
| Mo | -1.276490 | 0.354563  | 0.024581  |

-----

**Mo-Int<sub>5</sub>**

-----

|    |           |           |           |
|----|-----------|-----------|-----------|
| Mo | -3.345955 | 0.515653  | 0.149233  |
| O  | -0.784812 | 1.288681  | -1.297370 |
| O  | -1.947037 | -1.970827 | 1.214368  |
| O  | -1.999560 | -1.435862 | -1.762952 |
| O  | -0.733527 | 0.753111  | 1.684308  |

|    |           |           |           |
|----|-----------|-----------|-----------|
| O  | -2.787637 | 1.635493  | 1.866347  |
| O  | -4.048690 | -0.544400 | -1.556692 |
| O  | -3.996032 | -1.075572 | 1.402703  |
| O  | -2.838652 | 2.166632  | -1.089372 |
| C  | -1.647015 | 2.182523  | -1.542832 |
| C  | -3.132722 | -1.977949 | 1.658566  |
| C  | -3.200170 | -1.296035 | -2.140005 |
| C  | -1.580457 | 1.500565  | 2.255415  |
| H  | -1.354046 | 3.021561  | -2.182040 |
| H  | -1.259702 | 2.067343  | 3.135330  |
| H  | -3.532979 | -1.854435 | -3.021446 |
| H  | -3.438150 | -2.809313 | 2.302536  |
| O  | 0.867388  | -1.329874 | -0.269679 |
| C  | 2.042820  | -0.988226 | -0.259986 |
| O  | 2.466365  | 0.238206  | 0.033625  |
| O  | 3.043842  | -1.822074 | -0.547931 |
| C  | 3.926597  | 0.334037  | -0.196683 |
| C  | 4.326049  | -1.144896 | -0.300084 |
| H  | 4.360496  | 0.801145  | 0.684777  |
| C  | 4.184220  | 1.160848  | -1.442047 |
| H  | 4.753270  | -1.538929 | 0.621270  |
| H  | 4.990403  | -1.363552 | -1.132797 |
| Br | 7.258945  | 0.224871  | 0.413649  |
| H  | 3.769717  | 0.674295  | -2.334762 |
| H  | 3.733025  | 2.154444  | -1.342855 |
| H  | 5.268945  | 1.264952  | -1.546711 |
| Mo | -1.387453 | -0.328542 | -0.036706 |

-----  
**V-HKUST-1**

**V-HKUST-1**

-----

|   |           |           |           |
|---|-----------|-----------|-----------|
| V | -0.000098 | -0.000026 | -1.295868 |
| V | 0.000102  | 0.000026  | 1.295869  |
| O | -0.000238 | -2.035393 | -1.122334 |
| O | 0.000062  | 2.035348  | -1.122416 |
| O | 2.066326  | -0.000184 | -1.129138 |
| O | -2.066495 | 0.000140  | -1.128833 |
| O | -2.066322 | 0.000214  | 1.129130  |
| O | 2.066498  | -0.000169 | 1.128825  |
| O | 0.000258  | 2.035394  | 1.122341  |
| O | -0.000097 | -2.035348 | 1.122423  |

|   |           |           |           |
|---|-----------|-----------|-----------|
| C | -0.000190 | -2.621783 | 0.000057  |
| C | 0.000180  | 2.621783  | -0.000050 |
| C | 2.640480  | -0.000124 | -0.000201 |
| C | -2.640476 | 0.000120  | 0.000193  |
| H | -0.000557 | -3.719368 | 0.000079  |
| H | -3.739758 | 0.000676  | 0.000278  |
| H | 3.739761  | -0.000668 | -0.000285 |
| H | 0.000544  | 3.719368  | -0.000072 |

-----  
**V-Int<sub>0</sub>**  
-----

|   |           |           |           |
|---|-----------|-----------|-----------|
| V | 2.085813  | 0.103686  | 0.586723  |
| V | -0.526920 | -0.052280 | -0.582080 |
| O | 1.167049  | -0.448472 | 2.418147  |
| O | 2.887079  | 0.655625  | -1.322211 |
| O | 1.525965  | 2.079331  | 0.909830  |
| O | 2.163529  | -1.895540 | 0.031493  |
| O | 0.086124  | -2.062427 | -0.867657 |
| O | -0.560995 | 1.983546  | 0.022378  |
| O | 0.766544  | 0.465275  | -2.004239 |
| O | -0.840319 | -0.537630 | 1.403092  |
| C | -0.074244 | -0.642072 | 2.412958  |
| C | 2.001377  | 0.709182  | -2.208017 |
| C | 0.406016  | 2.572685  | 0.593974  |
| C | 1.219207  | -2.521049 | -0.530441 |
| H | -0.574957 | -0.930236 | 3.357484  |
| H | 1.421525  | -3.582578 | -0.741478 |
| H | 0.272362  | 3.634394  | 0.853563  |
| H | 2.268833  | 0.982002  | -3.245402 |
| O | -2.650492 | -0.323006 | -0.724744 |
| C | -3.652771 | 0.125792  | 0.247088  |
| C | -4.787373 | 0.929182  | -0.325209 |
| C | -3.465672 | -1.307124 | -0.025547 |
| H | -3.181377 | 0.510480  | 1.148906  |
| H | -5.605535 | 0.983826  | 0.403630  |
| H | -4.459498 | 1.951237  | -0.544355 |
| H | -5.168908 | 0.477313  | -1.246422 |
| H | -4.158643 | -1.824505 | -0.685517 |
| H | -2.903460 | -1.917449 | 0.675271  |

-----  
**V-Int<sub>1</sub>**  
-----

|    |           |           |           |
|----|-----------|-----------|-----------|
| V  | 2.999903  | -0.662864 | 0.626051  |
| V  | 0.690255  | 0.502655  | -0.562727 |
| O  | 1.746757  | -1.831655 | 1.864398  |
| O  | 4.212946  | 0.554957  | -0.662354 |
| O  | 2.845410  | 0.933110  | 1.955124  |
| O  | 2.818473  | -2.066044 | -0.899028 |
| O  | 0.977550  | -1.151736 | -1.866901 |
| O  | 0.999192  | 1.882306  | 1.030867  |
| O  | 2.279045  | 1.356728  | -1.469511 |
| O  | 0.005734  | -0.830216 | 0.848403  |
| C  | 0.513390  | -1.638098 | 1.680956  |
| C  | 3.546530  | 1.297061  | -1.426985 |
| C  | 1.929783  | 1.804662  | 1.882497  |
| C  | 1.893593  | -2.015704 | -1.763037 |
| H  | -0.211203 | -2.210499 | 2.287412  |
| H  | 1.904271  | -2.827861 | -2.504872 |
| H  | 1.963080  | 2.580725  | 2.661668  |
| H  | 4.078534  | 1.963328  | -2.130645 |
| O  | -1.288881 | 0.907766  | -0.943944 |
| C  | -2.413801 | 1.130919  | 0.010879  |
| C  | -3.175604 | 2.409618  | -0.174446 |
| C  | -2.517920 | 0.022766  | -0.917960 |
| H  | -2.121956 | 0.879570  | 1.027616  |
| H  | -4.152685 | 2.282138  | 0.304610  |
| H  | -2.643272 | 3.256181  | 0.276569  |
| H  | -3.341029 | 2.612647  | -1.237885 |
| Br | -5.438587 | -0.574529 | 0.161193  |
| H  | -3.115098 | 0.130676  | -1.814900 |
| H  | -2.309365 | -0.982631 | -0.575658 |

### V-TS<sub>1</sub>

|   |          |           |           |
|---|----------|-----------|-----------|
| V | 2.950273 | -0.700227 | 0.594299  |
| V | 0.650414 | 0.527077  | -0.542557 |
| O | 1.694492 | -1.931667 | 1.765833  |
| O | 4.167120 | 0.581687  | -0.622350 |
| O | 2.793860 | 0.824172  | 2.007273  |
| O | 2.786371 | -2.029984 | -0.997504 |
| O | 0.955593 | -1.058907 | -1.930682 |
| O | 0.949994 | 1.819728  | 1.126612  |
| O | 2.241384 | 1.436435  | -1.399548 |



|    |           |           |           |
|----|-----------|-----------|-----------|
| O  | -0.046788 | -0.882504 | 0.794962  |
| C  | 0.461780  | -1.730151 | 1.585203  |
| C  | 3.507238  | 1.366656  | -1.349562 |
| C  | 1.877172  | 1.696746  | 1.976016  |
| C  | 1.868021  | -1.929155 | -1.864423 |
| H  | -0.261735 | -2.336409 | 2.157711  |
| H  | 1.881622  | -2.700235 | -2.648120 |
| H  | 1.905156  | 2.430356  | 2.794848  |
| H  | 4.048492  | 2.066497  | -2.011014 |
| O  | -1.281061 | 0.981115  | -0.917289 |
| C  | -2.359682 | 1.230004  | 0.028178  |
| C  | -3.076515 | 2.543295  | -0.150071 |
| C  | -2.688226 | 0.074028  | -0.785559 |
| H  | -2.062057 | 1.012665  | 1.054723  |
| H  | -4.018480 | 2.508465  | 0.407755  |
| H  | -2.460103 | 3.371109  | 0.221371  |
| H  | -3.306974 | 2.717145  | -1.206919 |
| Br | -5.272480 | -0.622839 | 0.141591  |
| H  | -3.217235 | 0.198537  | -1.717659 |
| H  | -2.414148 | -0.915469 | -0.455619 |

-----

**V-Int<sub>2</sub>**

-----

|   |           |           |           |
|---|-----------|-----------|-----------|
| V | 2.929626  | -0.794103 | 0.288615  |
| V | 0.553681  | 0.635021  | -0.234633 |
| O | 1.866624  | -2.608292 | 0.021428  |
| O | 3.917364  | 1.088565  | 0.534311  |
| O | 2.278692  | -0.695174 | 2.279357  |
| O | 3.267953  | -0.689655 | -1.771066 |
| O | 1.364522  | 0.481424  | -2.207636 |
| O | 0.355546  | 0.452625  | 1.873609  |
| O | 1.931758  | 2.080234  | 0.134738  |
| O | 0.011324  | -1.368089 | -0.348530 |
| C | 0.643112  | -2.458275 | -0.240462 |
| C | 3.172935  | 2.091445  | 0.389664  |
| C | 1.197084  | -0.132083 | 2.612635  |
| C | 2.436096  | -0.103715 | -2.524247 |
| H | 0.038170  | -3.365932 | -0.397738 |
| H | 2.690727  | -0.113221 | -3.592453 |
| H | 0.968095  | -0.159752 | 3.686260  |
| H | 3.620631  | 3.092937  | 0.491499  |
| O | -1.199147 | 1.221264  | -0.716549 |

|    |           |           |           |
|----|-----------|-----------|-----------|
| C  | -2.392325 | 1.077326  | 0.000593  |
| C  | -3.151734 | 2.407230  | 0.041131  |
| C  | -3.130622 | -0.027907 | -0.755216 |
| H  | -2.206172 | 0.737241  | 1.033380  |
| H  | -4.102709 | 2.316238  | 0.579441  |
| H  | -2.532134 | 3.160403  | 0.541156  |
| H  | -3.351976 | 2.755883  | -0.980522 |
| Br | -4.922224 | -0.598003 | 0.125384  |
| H  | -3.419952 | 0.282964  | -1.759012 |
| H  | -2.547238 | -0.945121 | -0.773929 |

-----

**V-Int<sub>3</sub>**

-----

|    |           |           |           |
|----|-----------|-----------|-----------|
| V  | -3.051650 | -0.909490 | -0.489941 |
| O  | -4.032820 | 0.054568  | 1.151231  |
| O  | -1.997353 | -1.816686 | -2.090174 |
| O  | -2.532937 | -2.502431 | 0.767045  |
| O  | -3.238593 | 0.844065  | -1.611461 |
| O  | -1.304263 | 1.766584  | -0.846519 |
| O  | -0.564597 | -1.636287 | 1.512772  |
| O  | -0.108610 | -0.905623 | -1.244498 |
| O  | -2.006144 | 0.798886  | 1.797824  |
| C  | -3.263883 | 0.696056  | 1.911930  |
| C  | -0.757584 | -1.590425 | -2.086877 |
| C  | -1.466757 | -2.518651 | 1.446056  |
| C  | -2.356591 | 1.747297  | -1.544874 |
| H  | -3.700923 | 1.228756  | 2.771773  |
| H  | -2.538992 | 2.622927  | -2.180861 |
| H  | -1.314991 | -3.420410 | 2.053459  |
| H  | -0.153047 | -2.026211 | -2.899193 |
| O  | 1.153964  | 0.869506  | 0.640354  |
| O  | 0.467952  | 3.963818  | 0.610569  |
| C  | 2.311196  | 0.137564  | 0.944677  |
| C  | 0.979238  | 3.597293  | -0.375593 |
| C  | 3.036347  | 0.014717  | -0.396041 |
| H  | 2.059603  | -0.874793 | 1.302995  |
| C  | 3.126491  | 0.857809  | 2.023276  |
| O  | 1.521954  | 3.329883  | -1.378327 |
| H  | 2.412713  | -0.486064 | -1.132168 |
| H  | 3.393450  | 0.975871  | -0.764667 |
| Br | 4.743716  | -1.155760 | -0.310683 |
| H  | 3.407082  | 1.861806  | 1.678463  |

|   |           |          |          |
|---|-----------|----------|----------|
| H | 2.513696  | 0.968262 | 2.924994 |
| H | 4.038113  | 0.304887 | 2.278668 |
| V | -0.629477 | 0.192810 | 0.439272 |

-----

**V-TS<sub>2</sub>**

-----

|    |           |           |           |
|----|-----------|-----------|-----------|
| V  | -3.003876 | -1.134241 | -0.097700 |
| O  | -4.383968 | 0.510982  | -0.310621 |
| O  | -1.723990 | -2.821502 | 0.100200  |
| O  | -3.089228 | -0.947272 | 1.958539  |
| O  | -2.628666 | -1.081469 | -2.131419 |
| O  | -0.802172 | 0.275695  | -2.038698 |
| O  | -1.300081 | 0.443860  | 2.187403  |
| O  | -0.031631 | -1.345783 | 0.257721  |
| O  | -2.470614 | 1.659236  | -0.127690 |
| C  | -3.723376 | 1.584407  | -0.270912 |
| C  | -0.505330 | -2.514003 | 0.235692  |
| C  | -2.261688 | -0.244834 | 2.617283  |
| C  | -1.660014 | -0.431538 | -2.630452 |
| H  | -4.254745 | 2.554681  | -0.367632 |
| H  | -1.583458 | -0.515044 | -3.723729 |
| H  | -2.432419 | -0.261008 | 3.703538  |
| H  | 0.238887  | -3.330730 | 0.347411  |
| O  | 1.272370  | 1.119576  | 0.357925  |
| O  | 0.052626  | 3.135795  | -0.452340 |
| C  | 2.385810  | 0.372060  | 0.770467  |
| C  | 1.238703  | 3.081037  | -0.412262 |
| C  | 3.122512  | 0.024040  | -0.523833 |
| H  | 2.042690  | -0.564802 | 1.230921  |
| C  | 3.234496  | 1.144029  | 1.787167  |
| O  | 2.365748  | 3.415442  | -0.528432 |
| H  | 2.473330  | -0.520042 | -1.206164 |
| H  | 3.565739  | 0.896469  | -1.002766 |
| Br | 4.722836  | -1.261312 | -0.249627 |
| H  | 3.623595  | 2.070419  | 1.350020  |
| H  | 2.606362  | 1.405418  | 2.646684  |
| H  | 4.078306  | 0.539596  | 2.140591  |
| V  | -0.679923 | 0.650038  | 0.097633  |

-----

**V-Int<sub>4</sub>**

-----

|    |           |           |           |
|----|-----------|-----------|-----------|
| V  | -3.201860 | -1.018387 | 0.116830  |
| O  | -4.503074 | 0.612062  | -0.350718 |
| O  | -1.998855 | -2.729639 | 0.599001  |
| O  | -3.159254 | -0.428926 | 2.096929  |
| O  | -2.936005 | -1.399965 | -1.894801 |
| O  | -1.045888 | -0.157240 | -2.158415 |
| O  | -1.281096 | 0.853245  | 1.972491  |
| O  | -0.263703 | -1.321542 | 0.371689  |
| O  | -2.549135 | 1.705834  | -0.508927 |
| C  | -3.805827 | 1.645009  | -0.563874 |
| C  | -0.768155 | -2.454067 | 0.609683  |
| C  | -2.262409 | 0.334617  | 2.568276  |
| C  | -1.969484 | -0.913848 | -2.558493 |
| H  | -4.314392 | 2.596634  | -0.823919 |
| H  | -1.966719 | -1.212312 | -3.617257 |
| H  | -2.385555 | 0.552024  | 3.639551  |
| H  | -0.037862 | -3.256925 | 0.846182  |
| O  | 1.414801  | 0.872751  | -0.060912 |
| O  | 0.120849  | 2.557982  | -0.540364 |
| C  | 2.589266  | 0.232704  | 0.475637  |
| C  | 1.341117  | 2.299391  | -0.344003 |
| C  | 3.690198  | 0.320998  | -0.580189 |
| H  | 2.270925  | -0.808349 | 0.573338  |
| C  | 2.962219  | 0.793598  | 1.845731  |
| O  | 2.367845  | 2.963703  | -0.361588 |
| H  | 3.320010  | 0.023726  | -1.559950 |
| H  | 4.170637  | 1.294560  | -0.618773 |
| Br | 5.193862  | -1.005711 | -0.182490 |
| H  | 3.271370  | 1.839866  | 1.767488  |
| H  | 2.095267  | 0.729318  | 2.511696  |
| H  | 3.781105  | 0.209796  | 2.280630  |
| V  | -0.797417 | 0.646867  | -0.144810 |

-----

### V-TS<sub>3</sub>

-----

|   |           |           |           |
|---|-----------|-----------|-----------|
| V | -3.822725 | 0.707271  | 0.421490  |
| O | -3.193645 | 2.163726  | -0.911134 |
| O | -4.125218 | -0.940517 | 1.638290  |
| O | -2.807181 | 1.705358  | 2.002084  |
| O | -4.805839 | -0.327052 | -1.200785 |
| O | -2.810319 | -1.268697 | -1.603507 |

|    |           |           |           |
|----|-----------|-----------|-----------|
| O  | -0.970216 | 0.583748  | 1.343078  |
| O  | -2.202064 | -2.018716 | 1.075387  |
| O  | -1.257590 | 1.124984  | -1.501798 |
| C  | -2.100324 | 2.062973  | -1.542175 |
| C  | -3.289737 | -1.891186 | 1.700365  |
| C  | -1.584678 | 1.396733  | 2.090542  |
| C  | -4.042985 | -1.090193 | -1.847765 |
| H  | -1.871247 | 2.905074  | -2.203280 |
| H  | -4.456607 | -1.665079 | -2.705498 |
| H  | -0.976868 | 1.872448  | 2.891547  |
| H  | -3.562218 | -2.697702 | 2.389294  |
| O  | 0.525287  | -1.297676 | -0.435172 |
| C  | 1.744116  | -0.989704 | -0.463897 |
| O  | 2.118095  | 0.158039  | 0.151189  |
| O  | 2.669259  | -1.667316 | -1.001494 |
| C  | 3.512667  | 0.499474  | -0.096849 |
| C  | 4.303943  | -0.779417 | -0.320728 |
| H  | 3.839279  | 0.975671  | 0.826560  |
| C  | 3.595288  | 1.471967  | -1.268065 |
| H  | 4.384066  | -1.512085 | 0.466083  |
| H  | 4.787104  | -0.987357 | -1.259844 |
| Br | 6.543416  | 0.112527  | 0.439054  |
| H  | 3.249243  | 0.994334  | -2.192156 |
| H  | 2.964802  | 2.345204  | -1.072474 |
| H  | 4.631882  | 1.797512  | -1.398726 |
| V  | -1.393070 | -0.610635 | -0.293926 |

-----

**V-Int<sub>5</sub>**

-----

|   |           |           |           |
|---|-----------|-----------|-----------|
| V | -3.958640 | 0.691093  | 0.386291  |
| O | -3.737400 | 1.551702  | -1.484459 |
| O | -3.818602 | -0.382375 | 2.150398  |
| O | -2.863944 | 2.292043  | 1.262841  |
| O | -5.006798 | -0.968764 | -0.521754 |
| O | -2.974139 | -1.817371 | -0.929798 |
| O | -1.008546 | 1.156226  | 0.696831  |
| O | -1.862070 | -1.432060 | 1.659990  |
| O | -1.778764 | 0.526118  | -2.016070 |
| C | -2.748874 | 1.304207  | -2.235915 |
| C | -2.852098 | -1.162952 | 2.396105  |
| C | -1.610833 | 2.143968  | 1.211088  |
| C | -4.243701 | -1.857208 | -0.978823 |

|    |           |           |           |
|----|-----------|-----------|-----------|
| H  | -2.750351 | 1.839140  | -3.191976 |
| H  | -4.684639 | -2.755099 | -1.467419 |
| H  | -0.960953 | 2.935376  | 1.647426  |
| H  | -2.895235 | -1.658874 | 3.371949  |
| O  | 0.528641  | -1.106735 | -0.480909 |
| C  | 1.719321  | -0.793296 | -0.413207 |
| O  | 2.162610  | 0.334747  | 0.107100  |
| O  | 2.679144  | -1.583358 | -0.870174 |
| C  | 3.633732  | 0.435415  | -0.105333 |
| C  | 3.991084  | -1.000899 | -0.514307 |
| H  | 4.072813  | 0.696658  | 0.854727  |
| C  | 3.907916  | 1.496614  | -1.152322 |
| H  | 4.415584  | -1.588808 | 0.297535  |
| H  | 4.631271  | -1.065534 | -1.390345 |
| Br | 6.922729  | 0.069019  | 0.432963  |
| H  | 3.477947  | 1.217976  | -2.123161 |
| H  | 3.485628  | 2.459081  | -0.843501 |
| H  | 4.994709  | 1.590769  | -1.242467 |
| V  | -1.494517 | -0.605998 | -0.251603 |

-----

**Cd-HKUST-1**

**Cd-HKUST-1**

-----

|    |           |           |           |
|----|-----------|-----------|-----------|
| Cd | -1.536856 | -0.002448 | -0.000242 |
| Cd | 1.537725  | 0.002473  | -0.000136 |
| O  | -1.783991 | -1.385795 | -1.652568 |
| O  | -1.791115 | 1.378589  | 1.652976  |
| O  | -0.476725 | 1.596038  | -1.334732 |
| O  | -0.468948 | -1.596900 | 1.333746  |
| O  | 1.790533  | -1.651338 | 1.380074  |
| O  | 1.782733  | 1.658653  | -1.378636 |
| O  | 0.468175  | 1.334531  | 1.594778  |
| O  | 0.475259  | -1.333895 | -1.595098 |
| C  | -0.624319 | -1.724960 | -2.059491 |
| C  | -0.632472 | 1.721358  | 2.060039  |
| C  | 0.623189  | 2.063971  | -1.720413 |
| C  | 0.632093  | -2.060321 | 1.721475  |
| H  | -0.602504 | -2.431553 | -2.903986 |
| H  | 0.613356  | -2.905325 | 2.427557  |
| H  | 0.602035  | 2.909952  | -2.425263 |

|   |           |          |          |
|---|-----------|----------|----------|
| H | -0.612950 | 2.426384 | 2.905893 |
|---|-----------|----------|----------|

-----  
**Cd-Int<sub>0</sub>**  
-----

|    |           |           |           |
|----|-----------|-----------|-----------|
| Cd | -0.850718 | 0.054140  | -0.579345 |
| Cd | 2.115017  | -0.020412 | 0.462731  |
| O  | -0.554271 | -1.773043 | -1.691680 |
| O  | -1.187796 | 1.946888  | 0.427071  |
| O  | 0.996539  | 1.065954  | -1.790129 |
| O  | -0.381833 | -1.026784 | 1.522160  |
| O  | 1.738059  | -1.116157 | 2.309360  |
| O  | 3.152901  | 1.049956  | -1.131560 |
| O  | 0.937331  | 1.815608  | 1.207657  |
| O  | 1.542823  | -1.833016 | -0.831129 |
| C  | 0.596204  | -2.283975 | -1.520383 |
| C  | -0.186053 | 2.359295  | 1.093479  |
| C  | 2.213531  | 1.349004  | -1.938509 |
| C  | 0.491534  | -1.358423 | 2.366764  |
| H  | 0.754632  | -3.233120 | -2.039476 |
| H  | 0.167703  | -1.918285 | 3.259636  |
| H  | 2.523621  | 1.905356  | -2.837988 |
| H  | -0.351452 | 3.299037  | 1.628173  |
| O  | -3.173734 | -0.305021 | -0.474424 |
| C  | -4.050471 | 0.227386  | 0.565323  |
| C  | -5.336308 | 0.837451  | 0.077345  |
| C  | -3.774162 | -1.215470 | 0.489028  |
| H  | -3.498493 | 0.800129  | 1.308808  |
| H  | -6.037389 | 0.946522  | 0.914058  |
| H  | -5.153211 | 1.832717  | -0.342801 |
| H  | -5.802342 | 0.212693  | -0.691466 |
| H  | -4.511788 | -1.881247 | 0.045320  |
| H  | -3.063421 | -1.669432 | 1.176303  |

-----  
**Cd-Int<sub>1</sub>**  
-----

|    |           |           |           |
|----|-----------|-----------|-----------|
| Cd | 0.007509  | 0.236274  | 0.306309  |
| Cd | -3.139217 | -0.232619 | -0.230579 |
| O  | -0.399672 | -0.791459 | 2.155735  |
| O  | -0.007674 | 0.940513  | -1.736062 |
| O  | -1.685130 | 1.862137  | 0.848063  |
| O  | -1.231696 | -1.871410 | -0.760577 |

|    |           |           |           |
|----|-----------|-----------|-----------|
| O  | -3.411549 | -2.248529 | -1.151161 |
| O  | -3.915284 | 1.700981  | 0.550725  |
| O  | -2.252484 | 0.771952  | -2.074756 |
| O  | -2.651044 | -0.975615 | 1.869922  |
| C  | -1.576202 | -1.110278 | 2.502294  |
| C  | -1.078184 | 1.068311  | -2.401743 |
| C  | -2.862079 | 2.303692  | 0.925423  |
| C  | -2.182357 | -2.584439 | -1.175315 |
| H  | -1.638767 | -1.558651 | 3.496513  |
| H  | -1.962208 | -3.582693 | -1.597851 |
| H  | -3.013731 | 3.310152  | 1.357581  |
| H  | -0.935042 | 1.503843  | -3.393338 |
| O  | 2.169124  | 0.691617  | 0.628719  |
| C  | 3.291486  | 0.853877  | -0.331935 |
| C  | 3.953047  | 2.200735  | -0.340755 |
| C  | 3.458913  | -0.083135 | 0.762508  |
| H  | 3.059379  | 0.431425  | -1.307701 |
| H  | 4.948945  | 2.077858  | -0.780513 |
| H  | 3.371501  | 2.922966  | -0.927168 |
| H  | 4.073344  | 2.579082  | 0.679964  |
| Br | 6.402560  | -0.670206 | -0.162071 |
| H  | 4.026889  | 0.211059  | 1.636470  |
| H  | 3.357603  | -1.147323 | 0.585740  |

-----

**Cd-TS<sub>1</sub>**

-----

|    |           |           |           |
|----|-----------|-----------|-----------|
| Cd | 0.085576  | 0.315833  | 0.326969  |
| Cd | -3.104138 | -0.243776 | -0.225647 |
| O  | -0.508684 | -0.336970 | 2.307087  |
| O  | 0.068087  | 0.351376  | -1.850516 |
| O  | -1.540151 | 2.005250  | 0.366680  |
| O  | -1.390915 | -2.058609 | -0.277284 |
| O  | -3.578687 | -2.400039 | -0.643083 |
| O  | -3.768367 | 1.872468  | 0.031306  |
| O  | -2.173121 | 0.252821  | -2.240045 |
| O  | -2.765477 | -0.438146 | 2.016785  |
| C  | -1.707132 | -0.490629 | 2.688209  |
| C  | -0.970160 | 0.374625  | -2.575599 |
| C  | -2.696641 | 2.498419  | 0.285607  |
| C  | -2.372549 | -2.799829 | -0.539410 |
| H  | -1.816552 | -0.689846 | 3.759215  |
| H  | -2.198691 | -3.878361 | -0.695136 |
| H  | -2.796675 | 3.583641  | 0.450518  |



|    |           |           |           |
|----|-----------|-----------|-----------|
| H  | -0.773475 | 0.530857  | -3.641192 |
| O  | 2.206399  | 0.826496  | 0.604420  |
| C  | 3.259973  | 0.907158  | -0.392981 |
| C  | 3.914401  | 2.258575  | -0.528157 |
| C  | 3.660224  | -0.016770 | 0.652982  |
| H  | 2.978862  | 0.454969  | -1.346278 |
| H  | 4.853607  | 2.144682  | -1.079984 |
| H  | 3.256614  | 2.952711  | -1.066110 |
| H  | 4.140062  | 2.676761  | 0.458876  |
| Br | 6.248251  | -0.785461 | -0.110329 |
| H  | 4.183877  | 0.342843  | 1.524761  |
| H  | 3.453185  | -1.072351 | 0.566668  |

-----

### **Cd-Int<sub>2</sub>**

|    |           |           |           |
|----|-----------|-----------|-----------|
| Cd | -0.246248 | 0.835220  | -0.178745 |
| Cd | 2.850281  | -0.536954 | 0.239663  |
| O  | 1.192029  | 2.223823  | -1.126402 |
| O  | -0.520201 | -1.353291 | 0.206796  |
| O  | 1.072107  | 0.884813  | 1.713865  |
| O  | 1.834694  | -0.856500 | -1.947128 |
| O  | 3.870757  | -1.665545 | -1.465069 |
| O  | 3.094223  | 0.160901  | 2.386646  |
| O  | 1.471229  | -2.202561 | 0.911087  |
| O  | 3.280895  | 1.561930  | -0.502773 |
| C  | 2.445975  | 2.345943  | -1.019750 |
| C  | 0.232050  | -2.240696 | 0.701952  |
| C  | 1.996001  | 0.758456  | 2.562396  |
| C  | 2.882728  | -1.480525 | -2.247075 |
| H  | 2.863308  | 3.275829  | -1.436147 |
| H  | 2.958019  | -1.902407 | -3.261197 |
| H  | 1.822716  | 1.213342  | 3.547237  |
| H  | -0.269643 | -3.175486 | 0.994759  |
| O  | -2.193457 | 1.630814  | -0.357469 |
| C  | -3.373434 | 1.128859  | 0.191646  |
| C  | -4.467657 | 2.201377  | 0.120703  |
| C  | -3.708022 | -0.124639 | -0.622034 |
| H  | -3.254936 | 0.824096  | 1.249652  |
| H  | -5.415980 | 1.852623  | 0.546790  |
| H  | -4.134228 | 3.088740  | 0.671018  |
| H  | -4.632724 | 2.495257  | -0.924219 |
| Br | -5.398170 | -1.138044 | 0.034559  |

|   |           |           |           |
|---|-----------|-----------|-----------|
| H | -3.932092 | 0.113096  | -1.662267 |
| H | -2.926154 | -0.878038 | -0.542710 |

-----

### **Cd-Int<sub>3</sub>**

-----

|    |           |           |           |
|----|-----------|-----------|-----------|
| Cd | -3.010793 | -0.787955 | -0.014095 |
| O  | -1.215842 | 1.735645  | 1.623333  |
| O  | -0.008022 | -0.423626 | -1.760561 |
| O  | -2.705134 | 1.298454  | -1.230771 |
| O  | -0.645600 | -1.324931 | 1.176110  |
| O  | -2.513713 | -2.571777 | 1.303106  |
| O  | -4.666217 | 0.209658  | -1.236698 |
| O  | -1.886794 | -1.712457 | -1.749601 |
| O  | -3.152075 | 0.549099  | 1.811338  |
| C  | -2.335905 | 1.448106  | 2.134735  |
| C  | -0.785027 | -1.316272 | -2.206481 |
| C  | -3.904720 | 1.171694  | -1.579517 |
| C  | -1.305932 | -2.321460 | 1.575981  |
| H  | -2.635808 | 2.073582  | 2.989715  |
| H  | -0.775436 | -3.035567 | 2.221931  |
| H  | -4.336272 | 1.948107  | -2.231725 |
| H  | -0.444355 | -1.821962 | -3.123097 |
| O  | 2.137232  | 1.120106  | 0.502641  |
| O  | 0.851525  | 3.083288  | -0.848361 |
| C  | 3.181187  | 0.255112  | 0.840614  |
| C  | 2.008737  | 3.267537  | -0.754445 |
| C  | 3.731059  | -0.246657 | -0.498686 |
| H  | 2.822684  | -0.621030 | 1.411764  |
| C  | 4.229816  | 0.986019  | 1.687859  |
| O  | 3.128260  | 3.610464  | -0.759798 |
| H  | 2.961441  | -0.741017 | -1.089093 |
| H  | 4.209162  | 0.550861  | -1.068035 |
| Br | 5.206096  | -1.689203 | -0.321331 |
| H  | 4.625002  | 1.847953  | 1.135818  |
| H  | 3.753831  | 1.358632  | 2.602241  |
| H  | 5.063143  | 0.329208  | 1.964632  |
| Cd | 0.074106  | 0.645819  | 0.192974  |

-----

### **Cd-TS<sub>2</sub>**

-----

|    |           |           |           |
|----|-----------|-----------|-----------|
| Cd | -3.050783 | -0.798065 | 0.022867  |
| O  | -1.121363 | 1.566697  | 1.760253  |
| O  | -0.228896 | -0.164564 | -1.958678 |
| O  | -2.877421 | 1.423424  | -0.964362 |
| O  | -0.563586 | -1.415189 | 0.907927  |
| O  | -2.401734 | -2.703806 | 1.068496  |
| O  | -4.819685 | 0.302608  | -0.914919 |
| O  | -2.083587 | -1.487164 | -1.906849 |
| O  | -3.017027 | 0.323681  | 1.992872  |
| C  | -2.182249 | 1.196285  | 2.340077  |
| C  | -1.037694 | -1.018726 | -2.422607 |
| C  | -4.103712 | 1.313837  | -1.211719 |
| C  | -1.174506 | -2.462894 | 1.250551  |
| H  | -2.401150 | 1.710328  | 3.288185  |
| H  | -0.579105 | -3.237770 | 1.755091  |
| H  | -4.604084 | 2.151696  | -1.724104 |
| H  | -0.784528 | -1.411008 | -3.419124 |
| O  | 2.118459  | 1.033113  | 0.349474  |
| O  | 0.947473  | 2.980948  | -0.752771 |
| C  | 3.179344  | 0.212603  | 0.756810  |
| C  | 2.127174  | 2.967515  | -0.616109 |
| C  | 3.891235  | -0.195817 | -0.536798 |
| H  | 2.793867  | -0.702978 | 1.237263  |
| C  | 4.088649  | 0.939487  | 1.754768  |
| O  | 3.256113  | 3.302176  | -0.661820 |
| H  | 3.208513  | -0.692697 | -1.223884 |
| H  | 4.387329  | 0.646997  | -1.017666 |
| Br | 5.395962  | -1.578434 | -0.257472 |
| H  | 4.511318  | 1.842261  | 1.298807  |
| H  | 3.493799  | 1.242453  | 2.624085  |
| H  | 4.909313  | 0.297717  | 2.096015  |
| Cd | 0.005089  | 0.681171  | 0.078175  |

-----

**Cd-Int<sub>4</sub>**

-----

|    |           |           |           |
|----|-----------|-----------|-----------|
| Cd | -3.017813 | -0.937643 | 0.129625  |
| O  | -1.047351 | 1.453051  | 1.813518  |
| O  | -0.687587 | 0.280516  | -2.219558 |
| O  | -3.263943 | 1.400788  | -0.573513 |
| O  | -0.337036 | -1.294123 | 0.477317  |
| O  | -1.962485 | -2.826631 | 0.773022  |
| O  | -5.024721 | 0.031566  | -0.331575 |

|    |           |           |           |
|----|-----------|-----------|-----------|
| O  | -2.359779 | -1.254133 | -2.016420 |
| O  | -2.736741 | -0.029692 | 2.188188  |
| C  | -1.943201 | 0.890754  | 2.506022  |
| C  | -1.482769 | -0.607290 | -2.641282 |
| C  | -4.495967 | 1.155950  | -0.612264 |
| C  | -0.755863 | -2.445287 | 0.771813  |
| H  | -2.031527 | 1.264379  | 3.535087  |
| H  | -0.000868 | -3.195186 | 1.056661  |
| H  | -5.180137 | 1.967913  | -0.910364 |
| H  | -1.383509 | -0.844129 | -3.709114 |
| O  | 2.158399  | 0.896560  | 0.069516  |
| O  | 1.111685  | 2.728967  | -0.566133 |
| C  | 3.290014  | 0.144444  | 0.559237  |
| C  | 2.272254  | 2.292763  | -0.309992 |
| C  | 4.337786  | 0.063638  | -0.551342 |
| H  | 2.866336  | -0.852760 | 0.711295  |
| C  | 3.805327  | 0.692051  | 1.888486  |
| O  | 3.379893  | 2.814642  | -0.341814 |
| H  | 3.883175  | -0.204173 | -1.503922 |
| H  | 4.939307  | 0.963239  | -0.641295 |
| Br | 5.668700  | -1.441560 | -0.185234 |
| H  | 4.218487  | 1.696063  | 1.760480  |
| H  | 2.981857  | 0.736692  | 2.609450  |
| H  | 4.581942  | 0.032300  | 2.290752  |
| Cd | -0.259015 | 0.982561  | -0.182965 |

-----

**Cd-TS<sub>3</sub>**

-----

|    |          |           |           |
|----|----------|-----------|-----------|
| Cd | 3.318687 | 0.734372  | -0.004966 |
| O  | 0.649161 | -0.487258 | 2.055847  |
| O  | 0.662852 | -0.338326 | -2.176161 |
| O  | 2.504417 | -1.915718 | -0.107521 |
| O  | 1.178364 | 1.973415  | 0.039465  |
| O  | 3.178967 | 2.987502  | 0.078336  |
| O  | 4.607170 | -1.102914 | -0.071406 |
| O  | 2.789729 | 0.476832  | -2.200392 |
| O  | 2.780565 | 0.309382  | 2.162963  |
| C  | 1.696886 | -0.095143 | 2.649721  |
| C  | 1.712951 | 0.105922  | -2.727666 |
| C  | 3.757936 | -2.040934 | -0.109627 |
| C  | 1.904109 | 2.998962  | 0.076760  |
| H  | 1.639159 | -0.122614 | 3.745069  |
| H  | 1.417065 | 3.988297  | 0.111197  |

|    |           |           |           |
|----|-----------|-----------|-----------|
| H  | 4.158057  | -3.066567 | -0.148396 |
| H  | 1.664367  | 0.164649  | -3.822024 |
| O  | -1.225269 | -2.418042 | -0.100153 |
| C  | -2.322402 | -1.820322 | 0.005914  |
| O  | -2.252309 | -0.452807 | 0.013782  |
| O  | -3.483761 | -2.311439 | 0.097901  |
| C  | -3.533250 | 0.183832  | 0.340265  |
| C  | -4.641526 | -0.774718 | -0.074063 |
| H  | -3.560608 | 1.074911  | -0.283900 |
| C  | -3.549342 | 0.541084  | 1.819990  |
| H  | -4.820154 | -0.978198 | -1.117604 |
| H  | -5.325219 | -1.187138 | 0.647889  |
| Br | -6.437184 | 1.054341  | -0.338616 |
| H  | -3.505575 | -0.363633 | 2.437827  |
| H  | -2.686618 | 1.169082  | 2.062835  |
| H  | -4.469555 | 1.086902  | 2.047413  |
| Cd | 0.421297  | -0.880721 | -0.079571 |

-----

#### **Cd-Int<sub>5</sub>**

-----

|    |           |           |           |
|----|-----------|-----------|-----------|
| Cd | 3.701396  | 0.528631  | -0.044585 |
| O  | 0.777950  | -0.111264 | 2.087453  |
| O  | 0.881530  | -0.503426 | -2.163357 |
| O  | 2.536643  | -2.011850 | 0.160603  |
| O  | 1.605603  | 1.959001  | -0.226421 |
| O  | 3.705086  | 2.754015  | -0.248089 |
| O  | 4.719397  | -1.438455 | 0.161243  |
| O  | 3.089413  | 0.050349  | -2.190393 |
| O  | 2.984901  | 0.445731  | 2.121289  |
| C  | 1.866242  | 0.225638  | 2.644001  |
| C  | 1.996746  | -0.266965 | -2.718304 |
| C  | 3.767016  | -2.275496 | 0.214340  |
| C  | 2.439122  | 2.899178  | -0.292511 |
| H  | 1.799925  | 0.325883  | 3.731213  |
| H  | 2.071846  | 3.936744  | -0.396945 |
| H  | 4.062003  | -3.335108 | 0.317868  |
| H  | 1.983615  | -0.365832 | -3.807477 |
| O  | -1.302026 | -1.677400 | 0.058896  |
| C  | -2.442917 | -1.207859 | 0.102271  |
| O  | -2.701336 | 0.087001  | 0.015087  |
| O  | -3.520845 | -1.956763 | 0.241551  |
| C  | -4.159193 | 0.322201  | 0.242760  |

|    |           |           |           |
|----|-----------|-----------|-----------|
| C  | -4.724677 | -1.100832 | 0.114298  |
| H  | -4.502841 | 0.961669  | -0.566747 |
| C  | -4.343962 | 0.979044  | 1.595567  |
| H  | -5.179675 | -1.300327 | -0.853878 |
| H  | -5.410999 | -1.378187 | 0.909868  |
| Br | -7.422440 | 0.618486  | -0.389332 |
| H  | -4.007714 | 0.320921  | 2.407092  |
| H  | -3.782198 | 1.917949  | 1.647257  |
| H  | -5.411855 | 1.190234  | 1.709608  |
| Cd | 0.664489  | -0.573338 | -0.018512 |

-----

### Sc-HKUST-1

### Sc-HKUST-1

-----

|    |           |           |           |
|----|-----------|-----------|-----------|
| Sc | 0.000239  | 0.001180  | -1.442960 |
| Sc | -0.000324 | -0.001402 | 1.443507  |
| O  | -1.479163 | 1.515185  | -1.124877 |
| O  | 1.480540  | -1.511893 | -1.126548 |
| O  | -1.513411 | -1.478291 | -1.128010 |
| O  | 1.513319  | 1.481336  | -1.125560 |
| O  | 1.507238  | 1.484151  | 1.126643  |
| O  | -1.507564 | -1.487292 | 1.124179  |
| O  | 1.485250  | -1.508750 | 1.125659  |
| O  | -1.486141 | 1.505674  | 1.127302  |
| C  | -1.886914 | 1.922215  | 0.001632  |
| C  | 1.887396  | -1.921870 | -0.000724 |
| C  | -1.922302 | -1.887022 | -0.002389 |
| C  | 1.921964  | 1.887103  | 0.001144  |
| H  | -2.657579 | 2.707251  | 0.002625  |
| H  | 2.706754  | 2.658019  | 0.002313  |
| H  | -2.707344 | -2.657679 | -0.003485 |
| H  | 2.658522  | -2.706454 | -0.001231 |

-----

### Sc-Int<sub>0</sub>

-----

|    |           |           |           |
|----|-----------|-----------|-----------|
| Sc | -0.373792 | -0.122716 | -0.679176 |
| Sc | 2.142870  | 0.198657  | 0.788757  |
| O  | 0.726327  | -1.707267 | -1.578269 |
| O  | -0.908481 | 1.556574  | 0.611921  |
| O  | 0.592480  | 1.244929  | -1.983414 |

|   |           |           |           |
|---|-----------|-----------|-----------|
| O | -0.753737 | -1.462522 | 1.020025  |
| O | 1.199089  | -1.183007 | 2.122324  |
| O | 2.546243  | 1.495941  | -0.883188 |
| O | 1.054513  | 1.796379  | 1.705337  |
| O | 2.678437  | -1.464954 | -0.473037 |
| C | 1.924607  | -2.026497 | -1.313192 |
| C | -0.142373 | 2.110759  | 1.451819  |
| C | 1.752494  | 1.733915  | -1.833291 |
| C | 0.045307  | -1.674206 | 1.977578  |
| H | 2.342438  | -2.874820 | -1.870841 |
| H | -0.301654 | -2.354682 | 2.766139  |
| H | 2.093344  | 2.431688  | -2.607980 |
| H | -0.560826 | 2.950804  | 2.022699  |
| O | -2.687114 | -0.307868 | -0.805539 |
| C | -3.683144 | 0.002586  | 0.222982  |
| C | -4.763306 | 0.963720  | -0.191326 |
| C | -3.572083 | -1.358725 | -0.316904 |
| H | -3.213426 | 0.188152  | 1.186653  |
| H | -5.591848 | 0.925693  | 0.527040  |
| H | -4.374674 | 1.987751  | -0.208491 |
| H | -5.150688 | 0.718871  | -1.185669 |
| H | -4.284576 | -1.698784 | -1.066128 |
| H | -3.059808 | -2.124368 | 0.260093  |

-----

**Sc-Int<sub>1</sub>**

-----

|    |          |           |           |
|----|----------|-----------|-----------|
| Sc | 0.769521 | 0.329047  | -0.569150 |
| Sc | 3.294047 | -0.560906 | 0.718316  |
| O  | 1.671165 | -0.653184 | -2.240910 |
| O  | 0.527463 | 1.164998  | 1.430702  |
| O  | 2.008309 | 2.020968  | -1.028973 |
| O  | 0.189819 | -1.631549 | 0.162244  |
| O  | 2.101637 | -2.284111 | 1.177005  |
| O  | 3.938879 | 1.357958  | -0.058023 |
| O  | 2.446924 | 0.464990  | 2.402061  |
| O  | 3.591023 | -1.357338 | -1.278596 |
| C  | 2.784401 | -1.255814 | -2.242315 |
| C  | 1.324595 | 1.048348  | 2.401851  |
| C  | 3.219943 | 2.173544  | -0.697186 |
| C  | 0.891302 | -2.433076 | 0.839428  |
| H  | 3.073685 | -1.739020 | -3.186670 |
| H  | 0.397841 | -3.357999 | 1.170167  |

|    |           |           |           |
|----|-----------|-----------|-----------|
| H  | 3.693829  | 3.118983  | -1.000441 |
| H  | 1.008079  | 1.504017  | 3.351092  |
| O  | -1.347476 | 0.754251  | -0.819704 |
| C  | -2.491536 | 1.064068  | 0.084714  |
| C  | -3.185393 | 2.370424  | -0.167103 |
| C  | -2.634376 | -0.068602 | -0.805727 |
| H  | -2.242004 | 0.845186  | 1.120379  |
| H  | -4.181894 | 2.308892  | 0.284400  |
| H  | -2.626196 | 3.206017  | 0.271737  |
| H  | -3.308064 | 2.543800  | -1.241491 |
| Br | -5.598470 | -0.531963 | 0.108771  |
| H  | -3.196954 | 0.042354  | -1.724082 |
| H  | -2.482357 | -1.073701 | -0.432996 |

-----

**Sc-TS<sub>1</sub>**

-----

|    |           |           |           |
|----|-----------|-----------|-----------|
| Sc | 0.725248  | 0.371538  | -0.539665 |
| Sc | 3.260662  | -0.628359 | 0.672157  |
| O  | 1.563312  | -0.601089 | -2.253491 |
| O  | 0.556611  | 1.163780  | 1.488610  |
| O  | 2.009178  | 2.035830  | -0.986719 |
| O  | 0.107158  | -1.589527 | 0.169778  |
| O  | 2.022552  | -2.322616 | 1.122719  |
| O  | 3.941302  | 1.288365  | -0.080697 |
| O  | 2.479991  | 0.388478  | 2.395095  |
| O  | 3.480322  | -1.387546 | -1.348882 |
| C  | 2.656454  | -1.237965 | -2.291519 |
| C  | 1.375149  | 1.002602  | 2.435213  |
| C  | 3.232745  | 2.140687  | -0.682118 |
| C  | 0.800957  | -2.426743 | 0.810229  |
| H  | 2.910463  | -1.708538 | -3.252431 |
| H  | 0.287815  | -3.344854 | 1.130210  |
| H  | 3.729050  | 3.077838  | -0.975369 |
| H  | 1.096504  | 1.445944  | 3.402290  |
| O  | -1.334800 | 0.875475  | -0.771477 |
| C  | -2.461204 | 1.182294  | 0.111803  |
| C  | -3.134670 | 2.505510  | -0.137074 |
| C  | -2.746657 | 0.023710  | -0.709005 |
| H  | -2.218072 | 0.984866  | 1.156012  |
| H  | -4.109802 | 2.499501  | 0.362042  |
| H  | -2.526136 | 3.329562  | 0.255222  |
| H  | -3.296907 | 2.661311  | -1.209150 |



|    |           |           |           |
|----|-----------|-----------|-----------|
| Br | -5.449577 | -0.590662 | 0.092838  |
| H  | -3.245654 | 0.142542  | -1.658928 |
| H  | -2.537835 | -0.971516 | -0.346244 |

-----

### Sc-Int<sub>2</sub>

-----

|    |           |           |           |
|----|-----------|-----------|-----------|
| Sc | -0.564804 | 0.477880  | -0.046517 |
| Sc | -3.406669 | -0.699475 | 0.058416  |
| O  | -0.860153 | 0.269989  | 2.101134  |
| O  | -1.075058 | 0.388530  | -2.162595 |
| O  | -1.746421 | 2.290320  | 0.062444  |
| O  | -0.165082 | -1.682781 | -0.120709 |
| O  | -2.267649 | -2.526745 | -0.046046 |
| O  | -3.838176 | 1.424448  | 0.139042  |
| O  | -3.160240 | -0.494442 | -2.082190 |
| O  | -2.949525 | -0.603400 | 2.172892  |
| C  | -1.878094 | -0.186789 | 2.693061  |
| C  | -2.143674 | -0.042921 | -2.678638 |
| C  | -3.006244 | 2.371705  | 0.124491  |
| C  | -1.009753 | -2.620119 | -0.108302 |
| H  | -1.820485 | -0.225356 | 3.793149  |
| H  | -0.600689 | -3.641947 | -0.156853 |
| H  | -3.423152 | 3.390344  | 0.170619  |
| H  | -2.192546 | -0.021199 | -3.779599 |
| O  | 1.312192  | 0.997385  | -0.159169 |
| C  | 2.686769  | 1.035160  | -0.377251 |
| C  | 3.288726  | 2.341247  | 0.151894  |
| C  | 3.228191  | -0.213000 | 0.320944  |
| H  | 2.904084  | 0.952548  | -1.456762 |
| H  | 4.369133  | 2.394287  | -0.027833 |
| H  | 2.803808  | 3.188453  | -0.345969 |
| H  | 3.102033  | 2.429782  | 1.229844  |
| Br | 5.239053  | -0.547780 | -0.029468 |
| H  | 3.152874  | -0.144003 | 1.406239  |
| H  | 2.744406  | -1.115243 | -0.046959 |

-----

### Sc-Int<sub>3</sub>

-----

|    |           |           |           |
|----|-----------|-----------|-----------|
| Sc | -3.480996 | -0.762709 | -0.555468 |
| O  | -1.924442 | 1.009843  | 1.917254  |

|    |           |           |           |
|----|-----------|-----------|-----------|
| O  | -0.212915 | -1.143873 | -1.353416 |
| O  | -1.148317 | 1.718044  | -0.891937 |
| O  | -1.008010 | -1.822493 | 1.509657  |
| O  | -3.068559 | -2.411514 | 0.772754  |
| O  | -3.198794 | 1.098704  | -1.628219 |
| O  | -2.283113 | -1.735162 | -2.061456 |
| O  | -3.988019 | 0.430259  | 1.187184  |
| C  | -3.187067 | 0.998891  | 1.977657  |
| C  | -1.021826 | -1.721333 | -2.130625 |
| C  | -2.198926 | 1.863304  | -1.582128 |
| C  | -2.016546 | -2.579376 | 1.450692  |
| H  | -3.633359 | 1.550390  | 2.819852  |
| H  | -1.974226 | -3.493308 | 2.063784  |
| H  | -2.242898 | 2.762579  | -2.216183 |
| H  | -0.572965 | -2.277480 | -2.968731 |
| O  | 1.197134  | 0.327426  | 0.887496  |
| O  | 0.585638  | 4.024087  | 0.484160  |
| C  | 2.510843  | -0.102128 | 1.089798  |
| C  | 1.136090  | 3.566290  | -0.440524 |
| C  | 3.096314  | -0.261147 | -0.313721 |
| H  | 2.515019  | -1.089635 | 1.582950  |
| C  | 3.281207  | 0.889415  | 1.967824  |
| O  | 1.724199  | 3.166119  | -1.370089 |
| H  | 2.500003  | -0.941886 | -0.917218 |
| H  | 3.230854  | 0.694892  | -0.819310 |
| Br | 4.983012  | -1.109403 | -0.321520 |
| H  | 3.327727  | 1.871812  | 1.479946  |
| H  | 2.756110  | 1.009621  | 2.921942  |
| H  | 4.303956  | 0.547141  | 2.165165  |
| Sc | -0.691126 | 0.047469  | 0.431661  |

-----

**Sc-TS<sub>1</sub>**

-----

|    |           |           |           |
|----|-----------|-----------|-----------|
| Sc | -3.198359 | -1.276754 | 0.005282  |
| O  | -2.288101 | 1.818811  | 0.983132  |
| O  | -0.010612 | -1.199377 | -1.030739 |
| O  | -1.730155 | 1.060248  | -1.922551 |
| O  | -0.583052 | -0.449507 | 1.912929  |
| O  | -2.367671 | -1.844978 | 1.899525  |
| O  | -3.540801 | -0.297633 | -1.888342 |
| O  | -1.799956 | -2.586498 | -0.955548 |
| O  | -4.089147 | 0.447824  | 0.953534  |

|    |           |           |           |
|----|-----------|-----------|-----------|
| C  | -3.492731 | 1.528130  | 1.220305  |
| C  | -0.602742 | -2.291072 | -1.239162 |
| C  | -2.793813 | 0.581180  | -2.402536 |
| C  | -1.315439 | -1.350762 | 2.399272  |
| H  | -4.089755 | 2.306649  | 1.718316  |
| H  | -1.006159 | -1.756597 | 3.375031  |
| H  | -3.104922 | 0.974083  | -3.382548 |
| H  | -0.012106 | -3.081608 | -1.726357 |
| O  | 1.220246  | 1.065513  | 0.254043  |
| O  | 0.032389  | 3.056726  | -0.551747 |
| C  | 2.331861  | 0.315379  | 0.693215  |
| C  | 1.212836  | 2.999311  | -0.389352 |
| C  | 3.187105  | 0.102419  | -0.555638 |
| H  | 1.975076  | -0.665294 | 1.039489  |
| C  | 3.056974  | 1.009786  | 1.849648  |
| O  | 2.331838  | 3.384439  | -0.389332 |
| H  | 2.610711  | -0.390161 | -1.335585 |
| H  | 3.648400  | 1.022665  | -0.911799 |
| Br | 4.779344  | -1.170795 | -0.243893 |
| H  | 3.451426  | 1.982654  | 1.536378  |
| H  | 2.345553  | 1.169442  | 2.667482  |
| H  | 3.885795  | 0.396125  | 2.221647  |
| Sc | -0.796174 | 0.610520  | -0.016688 |

-----

**Sc-Int<sub>4</sub>**

-----

|    |           |           |           |
|----|-----------|-----------|-----------|
| Sc | -3.351424 | -1.192652 | 0.143801  |
| O  | -2.409951 | 1.942685  | 0.748845  |
| O  | -0.149531 | -1.290647 | -0.869637 |
| O  | -1.870846 | 0.800870  | -2.092492 |
| O  | -0.649647 | -0.167440 | 1.889259  |
| O  | -2.468845 | -1.500350 | 2.085618  |
| O  | -3.709128 | -0.499913 | -1.857632 |
| O  | -1.950438 | -2.641322 | -0.636847 |
| O  | -4.247415 | 0.625175  | 0.866138  |
| C  | -3.623249 | 1.717965  | 0.998984  |
| C  | -0.753438 | -2.394784 | -0.955410 |
| C  | -2.952880 | 0.292157  | -2.490457 |
| C  | -1.403841 | -0.968724 | 2.507053  |
| H  | -4.204618 | 2.571998  | 1.379588  |
| H  | -1.102201 | -1.236348 | 3.532412  |
| H  | -3.277961 | 0.564534  | -3.506694 |

|    |           |           |           |
|----|-----------|-----------|-----------|
| H  | -0.166333 | -3.236413 | -1.355502 |
| O  | 1.361019  | 0.938365  | 0.045285  |
| O  | 0.088549  | 2.575343  | -0.629923 |
| C  | 2.559153  | 0.305814  | 0.540783  |
| C  | 1.303425  | 2.329896  | -0.383096 |
| C  | 3.586735  | 0.295672  | -0.589384 |
| H  | 2.231800  | -0.721087 | 0.725713  |
| C  | 3.032293  | 0.943421  | 1.844323  |
| O  | 2.334093  | 2.983068  | -0.445991 |
| H  | 3.146057  | -0.070965 | -1.514916 |
| H  | 4.075464  | 1.255097  | -0.733812 |
| Br | 5.098114  | -1.022940 | -0.193650 |
| H  | 3.346783  | 1.977838  | 1.679775  |
| H  | 2.211436  | 0.929565  | 2.568680  |
| H  | 3.872553  | 0.374646  | 2.257834  |
| Sc | -0.919006 | 0.627835  | -0.139663 |

-----

### Sc-TS<sub>3</sub>

|    |           |           |           |
|----|-----------|-----------|-----------|
| Sc | -4.438213 | 0.194712  | 0.190677  |
| O  | -1.786103 | 1.428613  | -1.463565 |
| O  | -1.938147 | -1.734470 | 1.357809  |
| O  | -2.196371 | -1.540859 | -1.606250 |
| O  | -1.547777 | 1.227811  | 1.534251  |
| O  | -3.777692 | 1.542693  | 1.746527  |
| O  | -4.432077 | -1.254465 | -1.421594 |
| O  | -4.170662 | -1.449811 | 1.579571  |
| O  | -4.018657 | 1.736531  | -1.264087 |
| C  | -2.878126 | 2.002106  | -1.736664 |
| C  | -3.072445 | -2.011041 | 1.844434  |
| C  | -3.396884 | -1.764140 | -1.932988 |
| C  | -2.571074 | 1.754247  | 2.054636  |
| H  | -2.827099 | 2.823990  | -2.468027 |
| H  | -2.387360 | 2.476649  | 2.865766  |
| H  | -3.551179 | -2.482474 | -2.753768 |
| H  | -3.099768 | -2.831642 | 2.578360  |
| O  | 0.630447  | -0.340692 | -0.302334 |
| C  | 1.884605  | -0.266092 | -0.371880 |
| O  | 2.499792  | 0.566920  | 0.499261  |
| O  | 2.635244  | -0.902398 | -1.166676 |
| C  | 3.925993  | 0.715887  | 0.220388  |

|    |           |           |           |
|----|-----------|-----------|-----------|
| C  | 4.427323  | -0.549372 | -0.457100 |
| H  | 4.382913  | 0.813158  | 1.203850  |
| C  | 4.145236  | 1.974682  | -0.610357 |
| H  | 4.425465  | -1.487292 | 0.074637  |
| H  | 4.822354  | -0.534475 | -1.458406 |
| Br | 6.853676  | -0.308515 | 0.287771  |
| H  | 3.668475  | 1.878130  | -1.592986 |
| H  | 3.713536  | 2.840414  | -0.097720 |
| H  | 5.218583  | 2.136343  | -0.747355 |
| Sc | -1.476851 | -0.204781 | -0.080318 |

-----

### Sc-Int<sub>5</sub>

|    |           |           |           |
|----|-----------|-----------|-----------|
| Sc | -4.155496 | 0.871577  | 0.093884  |
| O  | -1.118806 | 1.043781  | -1.256892 |
| O  | -2.762907 | -1.984630 | 1.225708  |
| O  | -2.608349 | -1.522843 | -1.681486 |
| O  | -1.307208 | 0.541669  | 1.786612  |
| O  | -3.224799 | 1.737966  | 1.828481  |
| O  | -4.543983 | -0.356978 | -1.647239 |
| O  | -4.707977 | -0.838489 | 1.314277  |
| O  | -3.046819 | 2.221183  | -1.151876 |
| C  | -1.851423 | 2.035229  | -1.523091 |
| C  | -3.958971 | -1.810843 | 1.602383  |
| C  | -3.748868 | -1.209344 | -2.130466 |
| C  | -2.078654 | 1.422462  | 2.259552  |
| H  | -1.401040 | 2.821807  | -2.145757 |
| H  | -1.714798 | 1.972368  | 3.140391  |
| H  | -4.080320 | -1.737906 | -3.037368 |
| H  | -4.383908 | -2.593508 | 2.247807  |
| O  | 0.525417  | -1.197481 | -0.150269 |
| C  | 1.715509  | -0.867432 | -0.176055 |
| O  | 2.168373  | 0.285448  | 0.275381  |
| O  | 2.659355  | -1.657806 | -0.659700 |
| C  | 3.623386  | 0.403393  | -0.027529 |
| C  | 3.981263  | -1.040498 | -0.409369 |
| H  | 4.113090  | 0.703571  | 0.895925  |
| C  | 3.814287  | 1.433600  | -1.122542 |
| H  | 4.467366  | -1.592835 | 0.392690  |
| H  | 4.564518  | -1.125835 | -1.322583 |
| Br | 6.936006  | 0.099957  | 0.338866  |
| H  | 3.331593  | 1.116473  | -2.055895 |

|    |           |           |           |
|----|-----------|-----------|-----------|
| H  | 3.393859  | 2.398567  | -0.819322 |
| H  | 4.891754  | 1.542562  | -1.281348 |
| Sc | -1.614973 | -0.651467 | 0.012016  |

-----

### Fe-HKUST-1

#### Fe-HKUST-1

-----

|    |           |           |           |
|----|-----------|-----------|-----------|
| Fe | 0.000022  | -0.000024 | -1.219656 |
| Fe | -0.000007 | 0.000049  | 1.221138  |
| O  | 0.000638  | 2.029860  | -1.124446 |
| O  | -0.000546 | -2.029909 | -1.124386 |
| O  | -2.057721 | 0.000601  | -1.130984 |
| O  | 2.057789  | -0.000682 | -1.130918 |
| O  | 2.055572  | -0.003654 | 1.129627  |
| O  | -2.055617 | 0.003619  | 1.129560  |
| O  | -0.003800 | -2.031284 | 1.124006  |
| O  | 0.003649  | 2.031359  | 1.123951  |
| C  | 0.002644  | 2.610202  | -0.000573 |
| C  | -0.002660 | -2.610191 | -0.000481 |
| C  | -2.629045 | 0.002685  | -0.000297 |
| C  | 2.629057  | -0.002631 | -0.000208 |
| H  | 0.003993  | 3.708793  | -0.001337 |
| H  | 3.728636  | -0.004014 | 0.001098  |
| H  | -3.728625 | 0.003698  | 0.000948  |
| H  | -0.004092 | -3.708782 | -0.001186 |

-----

#### Fe-Int<sub>0</sub>

-----

|    |           |           |           |
|----|-----------|-----------|-----------|
| Fe | -0.535186 | -0.073810 | -0.372282 |
| Fe | 2.136710  | 0.134095  | 0.401355  |
| O  | -0.674342 | 1.945646  | 0.351968  |
| O  | 0.002369  | -2.077724 | -0.914073 |
| O  | -0.680687 | -0.719889 | 1.624015  |
| O  | 0.296842  | 0.616395  | -2.120461 |
| O  | 2.466798  | 0.792039  | -1.526680 |
| O  | 1.483021  | -0.548637 | 2.242216  |
| O  | 2.146769  | -1.751330 | -0.263651 |
| O  | 1.523262  | 1.972664  | 0.897856  |
| C  | 0.364314  | 2.490627  | 0.797221  |

|   |           |           |           |
|---|-----------|-----------|-----------|
| C | 1.191137  | -2.441222 | -0.747034 |
| C | 0.266566  | -0.820521 | 2.454811  |
| C | 1.508767  | 0.889675  | -2.348230 |
| H | 0.291222  | 3.529765  | 1.144608  |
| H | 1.751712  | 1.248553  | -3.364784 |
| H | 0.002573  | -1.181922 | 3.466399  |
| H | 1.462841  | -3.463054 | -1.042968 |
| O | -2.637695 | -0.290952 | -0.660339 |
| C | -3.636137 | 0.079565  | 0.340518  |
| C | -4.772865 | 0.924271  | -0.165241 |
| C | -3.448627 | -1.328519 | -0.045904 |
| H | -3.172851 | 0.394020  | 1.274104  |
| H | -5.592193 | 0.919977  | 0.564365  |
| H | -4.445096 | 1.960414  | -0.303397 |
| H | -5.151507 | 0.546271  | -1.120342 |
| H | -4.143836 | -1.792540 | -0.742537 |
| H | -2.892122 | -1.997868 | 0.604974  |

-----

#### Fe-Int<sub>1</sub>

|    |           |           |           |
|----|-----------|-----------|-----------|
| Fe | 0.472998  | 0.420878  | -0.377079 |
| Fe | 3.154602  | -0.577571 | 0.405789  |
| O  | 0.566850  | 0.787987  | 1.728056  |
| O  | 1.340586  | -0.205734 | -2.214306 |
| O  | 0.168516  | -1.649890 | 0.073424  |
| O  | 1.741243  | 2.130017  | -0.570514 |
| O  | 3.771945  | 1.343108  | 0.035444  |
| O  | 2.219281  | -2.374306 | 0.682749  |
| O  | 3.357439  | -1.000921 | -1.569171 |
| O  | 2.608425  | -0.014724 | 2.277370  |
| C  | 1.480272  | 0.514147  | 2.540122  |
| C  | 2.449424  | -0.747322 | -2.425686 |
| C  | 0.972178  | -2.526098 | 0.469159  |
| C  | 2.969510  | 2.251875  | -0.354108 |
| H  | 1.303152  | 0.754079  | 3.602564  |
| H  | 3.415348  | 3.253468  | -0.516093 |
| H  | 0.567847  | -3.540192 | 0.654248  |
| H  | 2.679820  | -1.040767 | -3.464336 |
| O  | -1.422974 | 0.949698  | -0.768260 |
| C  | -2.534041 | 1.091272  | 0.216932  |
| C  | -3.289932 | 2.385088  | 0.148157  |
| C  | -2.675789 | 0.058801  | -0.790763 |

|    |           |           |           |
|----|-----------|-----------|-----------|
| H  | -2.230991 | 0.765299  | 1.209939  |
| H  | -4.260766 | 2.226529  | 0.630310  |
| H  | -2.744154 | 3.188471  | 0.657869  |
| H  | -3.469135 | 2.674200  | -0.892505 |
| Br | -5.568153 | -0.610651 | 0.096200  |
| H  | -3.272544 | 0.250392  | -1.672570 |
| H  | -2.461047 | -0.973108 | -0.544096 |

-----

**Fe-TS<sub>1</sub>**

|    |           |           |           |
|----|-----------|-----------|-----------|
| Fe | 0.434581  | 0.449427  | -0.374938 |
| Fe | 3.118612  | -0.603692 | 0.393790  |
| O  | 0.147201  | -1.632810 | -0.020809 |
| O  | 1.728567  | 2.136778  | -0.461699 |
| O  | 1.333009  | -0.113663 | -2.240178 |
| O  | 0.516626  | 0.698003  | 1.768488  |
| O  | 2.549881  | -0.136122 | 2.298060  |
| O  | 3.346473  | -0.926681 | -1.608779 |
| O  | 3.751250  | 1.318625  | 0.135462  |
| O  | 2.188446  | -2.404216 | 0.568101  |
| C  | 0.942266  | -2.532332 | 0.334823  |
| C  | 2.952782  | 2.244016  | -0.221538 |
| C  | 2.448451  | -0.635693 | -2.464994 |
| C  | 1.420903  | 0.384065  | 2.576451  |
| H  | 0.530816  | -3.548627 | 0.461853  |
| H  | 1.234335  | 0.575015  | 3.651236  |
| H  | 2.696722  | -0.875082 | -3.517479 |
| H  | 3.400037  | 3.248530  | -0.328168 |
| O  | -1.423771 | 1.033840  | -0.764033 |
| C  | -2.512431 | 1.184029  | 0.209761  |
| C  | -3.255205 | 2.490027  | 0.136657  |
| C  | -2.773998 | 0.108356  | -0.726969 |
| H  | -2.209034 | 0.884559  | 1.213096  |
| H  | -4.203638 | 2.377762  | 0.672743  |
| H  | -2.667286 | 3.296655  | 0.591314  |
| H  | -3.475802 | 2.751133  | -0.903748 |
| Br | -5.436859 | -0.666757 | 0.094938  |
| H  | -3.323962 | 0.303102  | -1.635054 |
| H  | -2.513200 | -0.910513 | -0.480829 |

-----



**Fe-Int<sub>2</sub>**

---

|    |           |           |           |
|----|-----------|-----------|-----------|
| Fe | 0.313987  | 0.664353  | -0.264165 |
| Fe | 3.001292  | -0.726501 | 0.259309  |
| O  | 0.005599  | -1.491196 | -0.440725 |
| O  | 1.785993  | 2.200914  | 0.123530  |
| O  | 1.337111  | 0.471238  | -2.184416 |
| O  | 0.450690  | 0.266220  | 1.887404  |
| O  | 2.456237  | -0.726592 | 2.231611  |
| O  | 3.288580  | -0.597760 | -1.760873 |
| O  | 3.760899  | 1.147793  | 0.478924  |
| O  | 1.997522  | -2.478215 | -0.006973 |
| C  | 0.755399  | -2.480064 | -0.293881 |
| C  | 3.008953  | 2.173076  | 0.373076  |
| C  | 2.425119  | -0.042473 | -2.519194 |
| C  | 1.332531  | -0.251735 | 2.605150  |
| H  | 0.305270  | -3.479496 | -0.425281 |
| H  | 1.133087  | -0.313661 | 3.693418  |
| H  | 2.687943  | -0.023238 | -3.595592 |
| H  | 3.515572  | 3.142618  | 0.523001  |
| O  | -1.383537 | 1.437473  | -0.534518 |
| C  | -2.574923 | 1.141809  | 0.130448  |
| C  | -3.452652 | 2.394838  | 0.220961  |
| C  | -3.199196 | 0.015849  | -0.697514 |
| H  | -2.390112 | 0.762867  | 1.151001  |
| H  | -4.399499 | 2.195681  | 0.736971  |
| H  | -2.906815 | 3.173569  | 0.765525  |
| H  | -3.668112 | 2.773784  | -0.786767 |
| Br | -4.966017 | -0.733098 | 0.092370  |
| H  | -3.479803 | 0.350337  | -1.696361 |
| H  | -2.548338 | -0.854973 | -0.738585 |

---

**Fe-Int<sub>3</sub>**

---

|    |           |           |           |
|----|-----------|-----------|-----------|
| Fe | -3.156871 | -0.849810 | -0.338010 |
| O  | -1.323117 | 1.684516  | -0.995677 |
| O  | -0.613835 | -1.609854 | 1.437415  |
| O  | -0.173301 | -1.015837 | -1.403621 |
| O  | -1.799993 | 1.027841  | 1.825992  |
| O  | -3.832485 | 0.180441  | 1.300221  |
| O  | -2.239625 | -1.780072 | -1.921285 |
| O  | -2.652297 | -2.409906 | 0.857637  |

|    |           |           |           |
|----|-----------|-----------|-----------|
| O  | -3.365745 | 0.824320  | -1.463782 |
| C  | -2.440527 | 1.696671  | -1.554650 |
| C  | -1.534066 | -2.454395 | 1.468842  |
| C  | -0.982486 | -1.665646 | -2.101031 |
| C  | -3.027619 | 0.879536  | 2.001917  |
| H  | -2.674209 | 2.554439  | -2.208469 |
| H  | -3.481819 | 1.409963  | 2.861983  |
| H  | -0.573884 | -2.207099 | -2.976912 |
| H  | -1.381322 | -3.351446 | 2.093500  |
| O  | 1.332704  | 0.958924  | 0.687061  |
| O  | 0.614008  | 4.031515  | 0.380479  |
| C  | 2.488636  | 0.223289  | 0.972915  |
| C  | 1.175321  | 3.583146  | -0.542066 |
| C  | 3.086601  | -0.112268 | -0.395879 |
| H  | 2.246288  | -0.722841 | 1.487414  |
| C  | 3.425561  | 1.041177  | 1.868206  |
| O  | 1.758433  | 3.226525  | -1.493379 |
| H  | 2.390784  | -0.685229 | -1.005125 |
| H  | 3.433223  | 0.775849  | -0.923587 |
| Br | 4.762827  | -1.324090 | -0.293902 |
| H  | 3.714419  | 1.971696  | 1.361729  |
| H  | 2.896543  | 1.307062  | 2.790173  |
| H  | 4.333844  | 0.483635  | 2.125531  |
| Fe | -0.396563 | 0.261762  | 0.364253  |

-----

**Fe-TS<sub>2</sub>**

-----

|    |           |           |           |
|----|-----------|-----------|-----------|
| Fe | -3.070297 | -1.067317 | -0.014596 |
| O  | -1.702202 | 1.161284  | -1.709399 |
| O  | -0.505847 | -0.654255 | 1.731354  |
| O  | -0.039293 | -1.140541 | -1.137909 |
| O  | -2.056861 | 1.759985  | 1.124656  |
| O  | -3.914795 | 0.472121  | 1.012040  |
| O  | -1.917579 | -2.398589 | -1.035969 |
| O  | -2.411230 | -1.872539 | 1.756956  |
| O  | -3.552245 | -0.138879 | -1.777526 |
| C  | -2.771308 | 0.765772  | -2.222046 |
| C  | -1.286340 | -1.499379 | 2.223379  |
| C  | -0.709436 | -2.169613 | -1.373787 |
| C  | -3.257149 | 1.508080  | 1.362404  |
| H  | -3.081546 | 1.251249  | -3.167145 |
| H  | -3.834924 | 2.256259  | 1.941065  |

|    |           |           |           |
|----|-----------|-----------|-----------|
| H  | -0.218414 | -2.987618 | -1.938927 |
| H  | -0.971638 | -1.982491 | 3.169184  |
| O  | 1.351578  | 1.248118  | 0.264418  |
| O  | 0.421635  | 3.210410  | -0.608791 |
| C  | 2.414819  | 0.392800  | 0.689693  |
| C  | 1.561278  | 2.883331  | -0.391898 |
| C  | 3.223524  | 0.065418  | -0.565499 |
| H  | 1.943071  | -0.528527 | 1.049615  |
| C  | 3.211467  | 1.024147  | 1.832091  |
| O  | 2.727590  | 3.178809  | -0.438541 |
| H  | 2.581741  | -0.361973 | -1.333385 |
| H  | 3.792290  | 0.915553  | -0.936084 |
| Br | 4.627479  | -1.389834 | -0.225856 |
| H  | 3.703719  | 1.944744  | 1.505830  |
| H  | 2.526157  | 1.263848  | 2.652706  |
| H  | 3.968983  | 0.325295  | 2.204444  |
| Fe | -0.541178 | 0.687206  | 0.013878  |

-----

#### Fe-Int<sub>4</sub>

|    |           |           |           |
|----|-----------|-----------|-----------|
| Fe | -3.635220 | -0.894521 | 0.209759  |
| O  | -0.688282 | -1.383888 | -0.834469 |
| O  | -2.498885 | 2.028836  | 0.551612  |
| O  | -0.967158 | -0.125464 | 1.791892  |
| O  | -2.183530 | 0.785096  | -2.079271 |
| O  | -4.104444 | -0.351131 | -1.705135 |
| O  | -2.893065 | -1.279107 | 2.077869  |
| O  | -4.410013 | 0.865109  | 0.892584  |
| O  | -2.621774 | -2.514561 | -0.507423 |
| C  | -1.401795 | -2.409732 | -0.862939 |
| C  | -3.690674 | 1.918429  | 0.910089  |
| C  | -1.762240 | -0.825705 | 2.455284  |
| C  | -3.304948 | 0.347084  | -2.413652 |
| H  | -0.933801 | -3.340404 | -1.235899 |
| H  | -3.660977 | 0.581848  | -3.438146 |
| H  | -1.465188 | -1.092614 | 3.490518  |
| H  | -4.192147 | 2.829652  | 1.288247  |
| Fe | -1.033401 | 0.653518  | -0.235404 |
| O  | 0.492135  | 1.815981  | -0.597208 |
| C  | 1.749200  | 1.682865  | -0.380585 |
| O  | 2.036366  | 0.438187  | 0.173857  |
| O  | 2.643260  | 2.492781  | -0.616902 |

|    |          |           |           |
|----|----------|-----------|-----------|
| C  | 3.375085 | 0.141376  | 0.611383  |
| C  | 4.334464 | 0.206126  | -0.578963 |
| H  | 3.290321 | -0.904355 | 0.922696  |
| C  | 3.795011 | 0.991674  | 1.810050  |
| H  | 3.906453 | -0.269980 | -1.459684 |
| H  | 4.687901 | 1.207221  | -0.803606 |
| Br | 6.030429 | -0.880519 | -0.197459 |
| H  | 3.880133 | 2.044557  | 1.528415  |
| H  | 3.045776 | 0.896606  | 2.603480  |
| H  | 4.759172 | 0.644312  | 2.198558  |

-----

### Fe-TS<sub>3</sub>

|    |           |           |           |
|----|-----------|-----------|-----------|
| Fe | 3.856115  | 0.700950  | -0.160101 |
| O  | 1.018829  | 0.826396  | -1.563403 |
| O  | 2.323606  | -1.475138 | 1.572385  |
| O  | 1.063067  | 1.146417  | 1.346234  |
| O  | 2.243515  | -1.806456 | -1.328215 |
| O  | 4.278232  | -0.827290 | -1.451170 |
| O  | 3.113453  | 2.080704  | 1.154815  |
| O  | 4.359044  | -0.501727 | 1.408497  |
| O  | 3.067587  | 1.773532  | -1.704187 |
| C  | 1.855380  | 1.611548  | -2.062615 |
| C  | 3.513368  | -1.306460 | 1.920063  |
| C  | 1.925383  | 2.013765  | 1.611597  |
| C  | 3.417983  | -1.719745 | -1.750290 |
| H  | 1.517199  | 2.239339  | -2.907833 |
| H  | 3.763533  | -2.496444 | -2.463059 |
| H  | 1.638888  | 2.818215  | 2.319413  |
| H  | 3.885004  | -1.917569 | 2.764152  |
| Fe | 1.123598  | -0.571377 | 0.044532  |
| O  | -0.599272 | -1.539198 | 0.208557  |
| C  | -1.813101 | -1.200130 | 0.256882  |
| O  | -2.110059 | 0.101093  | 0.053522  |
| O  | -2.787852 | -1.978008 | 0.466959  |
| C  | -3.515656 | 0.403003  | 0.312616  |
| C  | -4.335237 | -0.853089 | 0.059735  |
| H  | -3.767116 | 1.162819  | -0.425363 |
| C  | -3.656874 | 0.946460  | 1.729071  |
| H  | -4.403623 | -1.265774 | -0.934002 |
| H  | -4.891820 | -1.330952 | 0.847556  |
| Br | -6.521395 | 0.354356  | -0.462811 |

|   |           |          |          |
|---|-----------|----------|----------|
| H | -3.389154 | 0.180175 | 2.466195 |
| H | -2.993103 | 1.805931 | 1.865810 |
| H | -4.692214 | 1.258173 | 1.896010 |

-----

**Fe-Int<sub>5</sub>**

-----

|    |           |           |           |
|----|-----------|-----------|-----------|
| Fe | -3.951484 | 0.607957  | 0.068239  |
| O  | -1.163871 | 1.200080  | 1.272665  |
| O  | -2.365075 | -1.758541 | -1.196646 |
| O  | -1.121491 | 0.932437  | -1.644650 |
| O  | -2.043304 | -1.528105 | 1.769648  |
| O  | -4.114613 | -0.617247 | 1.652805  |
| O  | -3.269996 | 1.639665  | -1.515113 |
| O  | -4.475182 | -0.948036 | -1.178183 |
| O  | -3.237527 | 2.094743  | 1.316791  |
| C  | -2.011030 | 2.056549  | 1.637062  |
| C  | -3.576273 | -1.772129 | -1.531630 |
| C  | -2.101633 | 1.606279  | -2.029443 |
| C  | -3.226118 | -1.388833 | 2.149118  |
| H  | -1.643788 | 2.856480  | 2.304936  |
| H  | -3.567407 | -1.988480 | 3.010195  |
| H  | -1.968552 | 2.255690  | -2.911141 |
| H  | -3.891952 | -2.589255 | -2.205853 |
| Fe | -1.288214 | -0.452062 | 0.031179  |
| O  | 0.551252  | -1.389518 | -0.194362 |
| C  | 1.723242  | -1.007815 | -0.208330 |
| O  | 2.113363  | 0.198992  | 0.160967  |
| O  | 2.717684  | -1.793021 | -0.592840 |
| C  | 3.570213  | 0.354738  | -0.105989 |
| C  | 3.999973  | -1.100378 | -0.345135 |
| H  | 4.015204  | 0.756831  | 0.801205  |
| C  | 3.758449  | 1.290839  | -1.283085 |
| H  | 4.473141  | -1.559136 | 0.521344  |
| H  | 4.626424  | -1.237581 | -1.222771 |
| Br | 6.891217  | 0.240064  | 0.380299  |
| H  | 3.321952  | 0.871455  | -2.198670 |
| H  | 3.287990  | 2.259363  | -1.081928 |
| H  | 4.835640  | 1.432043  | -1.416728 |

-----

## Ru-HKUST-1

### Ru-HKUST-1

-----

|    |           |           |           |
|----|-----------|-----------|-----------|
| Ru | -0.000441 | 0.000375  | -1.178876 |
| Ru | 0.000322  | -0.000229 | 1.179064  |
| O  | -2.007212 | -0.515428 | -1.131624 |
| O  | 2.006258  | 0.516531  | -1.132655 |
| O  | 0.515538  | -2.005806 | -1.132772 |
| O  | -0.516708 | 2.006455  | -1.131363 |
| O  | -0.515476 | 2.006228  | 1.132569  |
| O  | 0.516924  | -2.006487 | 1.131160  |
| O  | 2.007418  | 0.515120  | 1.131485  |
| O  | -2.006425 | -0.516978 | 1.132512  |
| C  | -2.563181 | -0.659609 | 0.000595  |
| C  | 2.563269  | 0.658949  | -0.000712 |
| C  | 0.659390  | -2.562821 | -0.000984 |
| C  | -0.659178 | 2.563037  | 0.000799  |
| H  | -3.625277 | -0.933040 | 0.000717  |
| H  | -0.932539 | 3.625097  | 0.000988  |
| H  | 0.933229  | -3.624758 | -0.001536 |
| H  | 3.625506  | 0.931831  | -0.001149 |

-----

### Ru-Int<sub>0</sub>

-----

|    |           |           |           |
|----|-----------|-----------|-----------|
| Ru | 1.802791  | 0.130183  | 0.220254  |
| Ru | -0.461277 | -0.079519 | -0.198042 |
| O  | 1.837597  | 1.839048  | -0.961547 |
| O  | 1.720989  | -1.589507 | 1.396164  |
| O  | 2.195811  | -1.037486 | -1.459012 |
| O  | 1.359631  | 1.297057  | 1.896273  |
| O  | -0.859004 | 1.092514  | 1.502369  |
| O  | -0.018652 | -1.252341 | -1.872852 |
| O  | -0.497906 | -1.801476 | 1.000223  |
| O  | -0.381277 | 1.645324  | -1.370503 |
| C  | 0.745229  | 2.207957  | -1.486094 |
| C  | 0.600747  | -2.161286 | 1.519292  |
| C  | 1.203455  | -1.462826 | -2.122169 |
| C  | 0.141514  | 1.513163  | 2.156954  |
| H  | 0.781023  | 3.104254  | -2.099505 |
| H  | -0.070267 | 2.122914  | 3.035632  |

|   |           |           |           |
|---|-----------|-----------|-----------|
| H | 1.427616  | -2.074163 | -2.996493 |
| H | 0.577183  | -3.055411 | 2.136601  |
| O | -2.729097 | -0.297296 | -0.594488 |
| C | -3.737335 | 0.084271  | 0.390146  |
| C | -4.881375 | 0.902937  | -0.144016 |
| C | -3.533478 | -1.329518 | 0.037254  |
| H | -3.285127 | 0.431734  | 1.317717  |
| H | -5.707432 | 0.904626  | 0.578202  |
| H | -4.567817 | 1.940428  | -0.304653 |
| H | -5.246081 | 0.498413  | -1.093693 |
| H | -4.220170 | -1.814644 | -0.654152 |
| H | -2.972817 | -1.982231 | 0.701743  |

-----

### Ru-Int<sub>1</sub>

-----

|    |           |           |           |
|----|-----------|-----------|-----------|
| Ru | 2.641758  | -0.473756 | 0.296356  |
| Ru | 0.502077  | 0.285761  | -0.228432 |
| O  | 3.331022  | 1.498704  | 0.243550  |
| O  | 1.912366  | -2.432624 | 0.339171  |
| O  | 3.044365  | -0.666699 | -1.748985 |
| O  | 2.192266  | -0.263611 | 2.331521  |
| O  | 0.111044  | 0.479542  | 1.829097  |
| O  | 0.962841  | 0.069741  | -2.266399 |
| O  | -0.168087 | -1.694841 | -0.176715 |
| O  | 1.248866  | 2.247988  | -0.261893 |
| C  | 2.478226  | 2.398005  | -0.022275 |
| C  | 0.679225  | -2.590633 | 0.094266  |
| C  | 2.116448  | -0.352470 | -2.554226 |
| C  | 1.036219  | 0.161600  | 2.628166  |
| H  | 2.851745  | 3.418886  | -0.046255 |
| H  | 0.815141  | 0.265645  | 3.690947  |
| H  | 2.341725  | -0.458738 | -3.615930 |
| H  | 0.306350  | -3.611126 | 0.119634  |
| O  | -1.521505 | 1.007871  | -0.754895 |
| C  | -2.645471 | 1.136475  | 0.203866  |
| C  | -3.402703 | 2.431580  | 0.144908  |
| C  | -2.742047 | 0.131997  | -0.840345 |
| H  | -2.374147 | 0.784035  | 1.196426  |
| H  | -4.384320 | 2.265748  | 0.602698  |
| H  | -2.869639 | 3.226306  | 0.682076  |
| H  | -3.556930 | 2.743558  | -0.893558 |

|    |           |           |           |
|----|-----------|-----------|-----------|
| Br | -5.702854 | -0.618833 | 0.097308  |
| H  | -3.332242 | 0.336525  | -1.725813 |
| H  | -2.551372 | -0.907773 | -0.606440 |

-----

### **Ru-TS<sub>1</sub>**

-----

|    |           |           |           |
|----|-----------|-----------|-----------|
| Ru | 2.612017  | -0.472475 | 0.291894  |
| Ru | 0.460156  | 0.285853  | -0.233051 |
| O  | 3.306668  | 1.498846  | 0.198668  |
| O  | 1.880312  | -2.428858 | 0.373293  |
| O  | 2.996949  | -0.704319 | -1.748871 |
| O  | 2.177870  | -0.224261 | 2.327751  |
| O  | 0.092299  | 0.510844  | 1.825527  |
| O  | 0.917093  | 0.036432  | -2.272568 |
| O  | -0.205468 | -1.699351 | -0.141027 |
| O  | 1.218790  | 2.243759  | -0.295227 |
| C  | 2.450046  | 2.394513  | -0.066487 |
| C  | 0.646659  | -2.589284 | 0.133722  |
| C  | 2.069274  | -0.391834 | -2.555851 |
| C  | 1.021397  | 0.200336  | 2.623205  |
| H  | 2.821895  | 3.416167  | -0.099436 |
| H  | 0.800048  | 0.311341  | 3.686003  |
| H  | 2.299594  | -0.507643 | -3.616480 |
| H  | 0.278969  | -3.611635 | 0.167307  |
| O  | -1.508916 | 0.990228  | -0.750641 |
| C  | -2.588425 | 1.164837  | 0.190719  |
| C  | -3.288501 | 2.500316  | 0.110457  |
| C  | -2.972033 | 0.067549  | -0.684373 |
| H  | -2.312578 | 0.876476  | 1.207214  |
| H  | -4.228619 | 2.447613  | 0.670368  |
| H  | -2.653320 | 3.289035  | 0.532412  |
| H  | -3.517348 | 2.752033  | -0.931081 |
| Br | -5.530107 | -0.627282 | 0.091992  |
| H  | -3.454693 | 0.272993  | -1.626751 |
| H  | -2.691047 | -0.945287 | -0.441959 |

-----

### **Ru-Int<sub>2</sub>**

-----

|    |          |           |           |
|----|----------|-----------|-----------|
| Ru | 2.553499 | -0.585883 | 0.269997  |
| Ru | 0.369460 | 0.422116  | -0.223319 |



|    |           |           |           |
|----|-----------|-----------|-----------|
| O  | 3.413442  | 1.291989  | 0.048549  |
| O  | 1.594840  | -2.424632 | 0.477416  |
| O  | 2.789055  | -0.945736 | -1.768544 |
| O  | 2.216299  | -0.176835 | 2.290035  |
| O  | 0.175910  | 0.740462  | 1.856477  |
| O  | 0.772312  | -0.001280 | -2.257917 |
| O  | -0.441811 | -1.505501 | 0.031541  |
| O  | 1.399787  | 2.249324  | -0.431074 |
| C  | 2.643973  | 2.264854  | -0.249231 |
| C  | 0.333451  | -2.458885 | 0.310712  |
| C  | 1.853328  | -0.573240 | -2.551729 |
| C  | 1.118530  | 0.382915  | 2.612130  |
| H  | 3.136864  | 3.237121  | -0.357507 |
| H  | 0.982322  | 0.577054  | 3.684693  |
| H  | 2.019692  | -0.783390 | -3.617274 |
| H  | -0.133629 | -3.442854 | 0.423174  |
| O  | -1.443213 | 1.307920  | -0.705079 |
| C  | -2.583065 | 1.057042  | 0.058747  |
| C  | -3.366395 | 2.355740  | 0.289037  |
| C  | -3.343086 | 0.020657  | -0.769873 |
| H  | -2.336128 | 0.612445  | 1.038389  |
| H  | -4.279448 | 2.185302  | 0.872893  |
| H  | -2.727079 | 3.066119  | 0.825316  |
| H  | -3.638581 | 2.805406  | -0.675058 |
| Br | -5.112857 | -0.661786 | 0.109734  |
| H  | -3.674289 | 0.421312  | -1.727648 |
| H  | -2.763294 | -0.890404 | -0.891473 |

-----

### **Ru-Int<sub>3</sub>**

|    |           |           |           |
|----|-----------|-----------|-----------|
| Ru | -2.709666 | -0.711007 | -0.247318 |
| O  | -3.383176 | 0.298298  | 1.438337  |
| O  | -1.956196 | -1.678268 | -1.928412 |
| O  | -2.239439 | -2.370635 | 0.928046  |
| O  | -3.063645 | 0.985365  | -1.404632 |
| O  | -0.984039 | 1.821240  | -0.982996 |
| O  | -0.140466 | -1.596001 | 1.367284  |
| O  | 0.144038  | -0.914540 | -1.499944 |
| O  | -1.298192 | 1.095727  | 1.883590  |
| C  | -2.528201 | 0.963124  | 2.111898  |
| C  | -0.710456 | -1.559818 | -2.163903 |
| C  | -1.082087 | -2.428626 | 1.456030  |

|    |           |           |           |
|----|-----------|-----------|-----------|
| C  | -2.130463 | 1.847898  | -1.502466 |
| H  | -2.914662 | 1.481027  | 2.996987  |
| H  | -2.365375 | 2.722287  | -2.123053 |
| H  | -0.887333 | -3.321022 | 2.064951  |
| H  | -0.338574 | -2.080770 | -3.053181 |
| O  | 1.423762  | 0.991485  | 0.514377  |
| O  | 0.852355  | 4.008596  | 0.482766  |
| C  | 2.525343  | 0.211193  | 0.877223  |
| C  | 1.389114  | 3.587337  | -0.467544 |
| C  | 3.250502  | -0.046313 | -0.445218 |
| H  | 2.214302  | -0.757605 | 1.301665  |
| C  | 3.382747  | 0.950369  | 1.912546  |
| O  | 1.952174  | 3.288965  | -1.451129 |
| H  | 2.612187  | -0.567824 | -1.153601 |
| H  | 3.664204  | 0.864145  | -0.877650 |
| Br | 4.904627  | -1.303344 | -0.273997 |
| H  | 3.735971  | 1.905477  | 1.501104  |
| H  | 2.769610  | 1.167824  | 2.794308  |
| H  | 4.252788  | 0.356778  | 2.219098  |
| Ru | -0.459458 | 0.148595  | 0.212536  |

-----

**Ru-TS<sub>2</sub>**

-----

|    |           |           |           |
|----|-----------|-----------|-----------|
| Ru | -2.673055 | -0.894167 | 0.026380  |
| O  | -3.697497 | 0.678309  | 0.883151  |
| O  | -1.612952 | -2.448206 | -0.856455 |
| O  | -2.117767 | -1.574960 | 1.916111  |
| O  | -3.195764 | -0.174838 | -1.840816 |
| O  | -1.289747 | 1.058992  | -1.948776 |
| O  | -0.223164 | -0.321896 | 1.881864  |
| O  | 0.280725  | -1.195226 | -0.922396 |
| O  | -1.810401 | 1.946096  | 0.907836  |
| C  | -3.028516 | 1.738767  | 1.131279  |
| C  | -0.384172 | -2.245869 | -1.124154 |
| C  | -1.025259 | -1.139987 | 2.405904  |
| C  | -2.381939 | 0.635478  | -2.402211 |
| H  | -3.591134 | 2.560497  | 1.587406  |
| H  | -2.681980 | 1.003098  | -3.393065 |
| H  | -0.755540 | -1.528181 | 3.398612  |
| H  | 0.153048  | -3.085510 | -1.579715 |
| O  | 1.577063  | 1.169474  | 0.111913  |
| O  | 0.579811  | 3.023192  | -0.597082 |

|    |           |           |           |
|----|-----------|-----------|-----------|
| C  | 2.696188  | 0.406227  | 0.585784  |
| C  | 1.707810  | 2.591119  | -0.346256 |
| C  | 3.681924  | 0.246849  | -0.571285 |
| H  | 2.265728  | -0.575098 | 0.805263  |
| C  | 3.295016  | 0.992323  | 1.864371  |
| O  | 2.861404  | 3.031258  | -0.394944 |
| H  | 3.169498  | -0.064990 | -1.479264 |
| H  | 4.299999  | 1.123823  | -0.737853 |
| Br | 5.013555  | -1.279424 | -0.209292 |
| H  | 3.716113  | 1.982734  | 1.672661  |
| H  | 2.507119  | 1.079710  | 2.620256  |
| H  | 4.079943  | 0.332701  | 2.253300  |
| Ru | -0.663699 | 0.463804  | -0.031067 |

-----

**Ru-Int<sub>4</sub>**

-----

|    |           |           |           |
|----|-----------|-----------|-----------|
| Ru | -3.014819 | -0.775774 | 0.229141  |
| O  | -2.336012 | -1.159874 | 2.166489  |
| O  | -3.679275 | -0.385448 | -1.713360 |
| O  | -2.056639 | -2.511133 | -0.442528 |
| O  | -3.959019 | 0.969638  | 0.901381  |
| O  | -2.078663 | 2.172700  | 0.492024  |
| O  | -0.172965 | -1.324657 | -0.883781 |
| O  | -1.795837 | 0.808133  | -2.143591 |
| O  | -0.454733 | 0.048235  | 1.768084  |
| C  | -1.214693 | -0.658171 | 2.482120  |
| C  | -2.915010 | 0.314791  | -2.444584 |
| C  | -0.859400 | -2.380223 | -0.842009 |
| C  | -3.270981 | 2.035491  | 0.875209  |
| H  | -0.867871 | -0.865973 | 3.492423  |
| H  | -3.773161 | 2.939345  | 1.226104  |
| H  | -0.367496 | -3.291138 | -1.188055 |
| H  | -3.271982 | 0.512232  | -3.453685 |
| O  | 0.613452  | 1.709562  | -0.672417 |
| C  | 1.864692  | 1.600170  | -0.454987 |
| O  | 2.195509  | 0.399522  | 0.176857  |
| O  | 2.752356  | 2.407885  | -0.750598 |
| C  | 3.544437  | 0.183159  | 0.614344  |
| C  | 4.501055  | 0.229739  | -0.579998 |
| H  | 3.510230  | -0.849225 | 0.977699  |
| C  | 3.939580  | 1.106976  | 1.767451  |
| H  | 4.082452  | -0.278940 | -1.446566 |

|    |           |           |           |
|----|-----------|-----------|-----------|
| H  | 4.846253  | 1.226117  | -0.833928 |
| Br | 6.219016  | -0.827387 | -0.167587 |
| H  | 3.970512  | 2.147529  | 1.433373  |
| H  | 3.203654  | 1.016435  | 2.573947  |
| H  | 4.923877  | 0.824045  | 2.159030  |
| Ru | -1.068942 | 0.455548  | -0.201154 |

-----

### Ru-TS<sub>3</sub>

-----

|    |           |           |           |
|----|-----------|-----------|-----------|
| Ru | -3.191132 | 0.668946  | 0.211469  |
| O  | -2.344734 | 2.273043  | -0.821179 |
| O  | -4.022094 | -0.944189 | 1.243501  |
| O  | -2.462619 | 1.444644  | 2.012387  |
| O  | -3.904019 | -0.116751 | -1.592180 |
| O  | -1.984659 | -1.291700 | -1.868997 |
| O  | -0.540864 | 0.268754  | 1.761324  |
| O  | -2.100499 | -2.123701 | 0.990311  |
| O  | -0.421799 | 1.103225  | -1.105190 |
| C  | -1.157575 | 2.117566  | -1.239315 |
| C  | -3.283816 | -1.964684 | 1.393319  |
| C  | -1.304583 | 1.066806  | 2.368078  |
| C  | -3.137899 | -0.915912 | -2.211809 |
| H  | -0.724538 | 2.958998  | -1.775916 |
| H  | -3.524674 | -1.322749 | -3.148226 |
| H  | -0.927233 | 1.480689  | 3.304655  |
| H  | -3.726662 | -2.799183 | 1.933294  |
| O  | 0.793871  | -1.291645 | -0.507442 |
| C  | 2.007729  | -0.970318 | -0.509101 |
| O  | 2.341041  | 0.267213  | -0.050634 |
| O  | 2.971231  | -1.701200 | -0.889242 |
| C  | 3.737159  | 0.596817  | -0.272019 |
| C  | 4.568404  | -0.675043 | -0.219563 |
| H  | 3.996511  | 1.236735  | 0.570764  |
| C  | 3.885052  | 1.353006  | -1.588743 |
| H  | 4.571596  | -1.281256 | 0.672007  |
| H  | 5.107283  | -1.033504 | -1.079744 |
| Br | 6.822127  | 0.099426  | 0.538692  |
| H  | 3.608885  | 0.712198  | -2.434207 |
| H  | 3.229237  | 2.229543  | -1.589443 |
| H  | 4.923246  | 1.678304  | -1.709730 |
| Ru | -1.213272 | -0.534642 | -0.059288 |

-----

**Ru-Int<sub>5</sub>**

---

|    |           |           |           |
|----|-----------|-----------|-----------|
| Ru | -3.286304 | -0.611475 | -0.100319 |
| O  | -2.667963 | -1.995241 | 1.332922  |
| O  | -3.884711 | 0.782301  | -1.533333 |
| O  | -2.579135 | -1.867624 | -1.613822 |
| O  | -3.975277 | 0.654727  | 1.416690  |
| O  | -1.946609 | 1.657338  | 1.531298  |
| O  | -0.551107 | -0.863084 | -1.524279 |
| O  | -1.855759 | 1.789184  | -1.434943 |
| O  | -0.636666 | -0.996420 | 1.448883  |
| C  | -1.486597 | -1.869257 | 1.775856  |
| C  | -3.032772 | 1.659434  | -1.869175 |
| C  | -1.374423 | -1.704519 | -1.977323 |
| C  | -3.147571 | 1.495845  | 1.881923  |
| H  | -1.171993 | -2.595738 | 2.521048  |
| H  | -3.516679 | 2.151573  | 2.672181  |
| H  | -1.011935 | -2.364108 | -2.766617 |
| H  | -3.356097 | 2.381093  | -2.615921 |
| O  | 0.769334  | 1.484844  | 0.147356  |
| C  | 1.932934  | 1.085130  | 0.171772  |
| O  | 2.303446  | -0.170198 | -0.021878 |
| O  | 2.953501  | 1.905339  | 0.400869  |
| C  | 3.764347  | -0.302456 | 0.209454  |
| C  | 4.216079  | 1.165902  | 0.221950  |
| H  | 4.172881  | -0.837265 | -0.645233 |
| C  | 3.996714  | -1.062136 | 1.500764  |
| H  | 4.672435  | 1.484295  | -0.713921 |
| H  | 4.870696  | 1.416898  | 1.053425  |
| Br | 7.093933  | -0.311356 | -0.385780 |
| H  | 3.601954  | -0.509256 | 2.363377  |
| H  | 3.511399  | -2.043744 | 1.461312  |
| H  | 5.078089  | -1.195540 | 1.608760  |
| Ru | -1.208767 | 0.410389  | 0.006557  |

---

## S9. References

1. B. Supronowicz, A. Mavrandonakis and T. Heine, *The Journal of Physical Chemistry C*, 2015, **119**, 3024-3032.
2. L. W. Chung, W. M. C. Sameera, R. Ramozzi, A. J. Page, M. Hatanaka, G. P. Petrova, T. V. Harris, X. Li, Z. Ke and F. Liu, *Chem. Rev.*, 2015, **115**, 5678-5796.
3. H. Hirao, W. K. H. Ng, A. M. P. Moeljadi and S. Bureekaew, *ACS Catal.*, 2015, **5**, 3287-3291.
4. S. O. Odoh, C. J. Cramer, D. G. Truhlar and L. Gagliardi, *Chem. Rev.*, 2015, **115**, 6051-6111.
5. P. Verma, X. Xu and D. G. Truhlar, *J. Phys. Chem. C*, 2013, **117**, 12648-12660.
6. Y. Zhao and D. G. Truhlar, *Theor. Chem. Acc.*, 2008, **120**, 215-241.
7. C. Adamo and V. Barone, *J. Chem. Phys.*, 1999, **110**, 6158-6170.
8. S. Grimme, J. Antony, S. Ehrlich and H. Krieg, *J. Chem. Phys.*, 2010, **132**, 154104.
9. P. J. Stephens, F. J. Devlin, C. F. N. Chabalowski and M. J. Frisch, *J. Phys. Chem.*, 1994, **98**, 11623-11627.
10. A. S. Rosen, J. M. Notestein and R. Q. Snurr, *ACS Catal.*, 2019.
